# Supplementary material
Source: PubMed Central journal article supplement (PMC2920598)
Supplement: NIHMS61470-supplement-si20060726_071.pdf [file NIHMS61470-supplement-si20060726_071.pdf]

# Pseudotetrahedral manganese complexes supported by the anionic tris(phosphino)borate ligand [PhBP<sup>i</sup>Pr<sub>3</sub>]

Connie C. Lu and Jonas C. Peters\*

*Division of Chemistry and Chemical Engineering, Arnold and Mabel Beckman Laboratories of Chemical Synthesis, California Institute of Technology, Pasadena, California 91125*

## Supporting Information

- S3 Figure 1. Fully labeled drawing of [PhBP<sup>i</sup>Pr<sub>3</sub>]MnCl (**1a**).
- S4 Figure 2. Fully labeled drawing of {[PhBP<sup>i</sup>Pr<sub>3</sub>]Mn( $\mu$ -Cl)}<sub>2</sub> (**1b**).
- S5 Figure 3. Fully labeled drawing of [PhBP<sup>i</sup>Pr<sub>3</sub>]MnI (**2**).
- S6 Figure 4. Fully labeled drawing of [PhBP<sup>i</sup>Pr<sub>3</sub>]Mn(N<sub>3</sub>) (**3**).
- S7 Figure 5. Fully labeled drawing of [PhBP<sup>i</sup>Pr<sub>3</sub>]Mn(CH<sub>2</sub>Ph) (**4**).
- S8 Figure 6. Fully labeled drawing of [PhBP<sup>i</sup>Pr<sub>3</sub>]Mn(NH(2,6-<sup>i</sup>Pr<sub>2</sub>-C<sub>6</sub>H<sub>3</sub>)) (**6**).
- S9 Figure 7. Fully labeled drawing of [PhBP<sup>i</sup>Pr<sub>3</sub>]Mn(dbabh) (**7**).
- S10 Figure 8. Fully labeled drawing of [PhBP<sup>i</sup>Pr<sub>3</sub>]Mn(1-Ph(isoindolate)) (**8**).
- S11 Figure 9. Fully labeled drawing of [PhBP<sup>i</sup>Pr<sub>3</sub>]Ti-MnBr(CO)<sub>4</sub> (**9**).
- S12 Figure 10. Fully labeled drawing of [PhBP<sup>i</sup>Pr<sub>3</sub>]Mn(CN<sup>t</sup>Bu)<sub>3</sub> (**10**).
- S13 Figure 11. Fully labeled drawing of {(Hdbabh)MnI( $\mu$ -N-dbabh)}<sub>2</sub>.
- S14 Table 1. Crystal data and structure refinement for [PhBP<sup>i</sup>Pr<sub>3</sub>]MnCl (**1a**).
- S16 Table 2. Atomic coordinates and equivalent isotropic displacement parameters for **1a**.
- S17 Table 3. Bond lengths and angles for **1a**.
- S20 Table 4. Anisotropic parameters for **1a**.
- S21 Table 5. Crystal data and structure refinement for {[PhBP<sup>i</sup>Pr<sub>3</sub>]Mn( $\mu$ -Cl)}<sub>2</sub> (**1b**).
- S23 Table 6. Atomic coordinates and equivalent isotropic displacement parameters for **1b**.
- S24 Table 7. Bond lengths and angles for **1b**.
- S28 Table 8. Anisotropic parameters for **1b**.
- S29 Table 9. Crystal data and structure refinement for [PhBP<sup>i</sup>Pr<sub>3</sub>]MnI (**2**).
- S31 Table 10. Atomic coordinates and equivalent isotropic displacement parameters for **2**.
- S32 Table 11. Bond lengths and angles for **2**.
- S35 Table 12. Anisotropic parameters for **2**.
- S36 Table 13. Crystal data and structure refinement for [PhBP<sup>i</sup>Pr<sub>3</sub>]Mn(N<sub>3</sub>) (**3**).
- S38 Table 14. Atomic coordinates and equivalent isotropic displacement parameters for **3**.
- S40 Table 15. Bond lengths and angles for **3**.
- S46 Table 16. Anisotropic parameters for **3**.

|      |                                                                                                                                                   |
|------|---------------------------------------------------------------------------------------------------------------------------------------------------|
| S48  | Table 17. Crystal data and structure refinement for [PhBP <sup>iPr</sup> <sub>3</sub> ]Mn(CH <sub>2</sub> Ph) ( <b>4</b> ).                       |
| S50  | Table 18. Atomic coordinates and equivalent isotropic displacement parameters for <b>4</b> .                                                      |
| S51  | Table 19. Bond lengths and angles for <b>4</b> .                                                                                                  |
| S54  | Table 20. Anisotropic parameters for <b>4</b> .                                                                                                   |
| S55  | Table 21. Crystal data and structure refinement for [PhBP <sup>iPr</sup> <sub>3</sub> ]Mn(NH(2,6- <sup>i</sup> Pr <sub>2</sub> Ph)) ( <b>6</b> ). |
| S57  | Table 22. Atomic coordinates and equivalent isotropic displacement parameters for <b>6</b> .                                                      |
| S59  | Table 23. Bond lengths and angles for <b>6</b> .                                                                                                  |
| S63  | Table 24. Anisotropic parameters for <b>6</b> .                                                                                                   |
| S65  | Table 25. Crystal data and structure refinement for [PhBP <sup>iPr</sup> <sub>3</sub> ]Mn(dbabh) ( <b>7</b> ).                                    |
| S67  | Table 26. Atomic coordinates and equivalent isotropic displacement parameters for <b>7</b> .                                                      |
| S69  | Table 27. Bond lengths and angles for <b>7</b> .                                                                                                  |
| S73  | Table 28. Anisotropic parameters for <b>7</b> .                                                                                                   |
| S75  | Table 29. Crystal data and structure refinement for [PhBP <sup>iPr</sup> <sub>3</sub> ]Mn(1-Ph(isoindolate)) ( <b>8</b> ).                        |
| S77  | Table 30. Atomic coordinates and equivalent isotropic displacement parameters for <b>8</b> .                                                      |
| S79  | Table 31. Bond lengths and angles for <b>8</b> .                                                                                                  |
| S84  | Table 32. Anisotropic parameters for <b>8</b> .                                                                                                   |
| S85  | Table 33. Crystal data and structure refinement for [PhBP <sup>iPr</sup> <sub>3</sub> ]Tl-MnBr(CO) <sub>4</sub> ( <b>9</b> ).                     |
| S87  | Table 34. Atomic coordinates and equivalent isotropic displacement parameters for <b>9</b> .                                                      |
| S88  | Table 35. Bond lengths and angles for <b>9</b> .                                                                                                  |
| S91  | Table 36. Anisotropic parameters for <b>9</b> .                                                                                                   |
| S92  | Table 37. Crystal data and structure refinement for [PhBP <sup>iPr</sup> <sub>3</sub> ]Mn(CN <sup>t</sup> Bu) <sub>3</sub> ( <b>10</b> ).         |
| S94  | Table 38. Atomic coordinates and equivalent isotropic displacement parameters for <b>10</b> .                                                     |
| S96  | Table 39. Bond lengths and angles for <b>10</b> .                                                                                                 |
| S100 | Table 40. Anisotropic parameters for <b>10</b> .                                                                                                  |
| S102 | Table 41. Crystal data and structure refinement for {(Hdbabh)MnI(μ- <i>N</i> -dbabh)} <sub>2</sub> .                                              |
| S104 | Table 42. Atomic coordinates and equivalent isotropic displacement parameters for {(Hdbabh)MnI(μ- <i>N</i> -dbabh)} <sub>2</sub> .                |
| S106 | Table 43. Bond lengths and angles for {(Hdbabh)MnI(μ- <i>N</i> -dbabh)} <sub>2</sub> .                                                            |
| S110 | Table 44. Anisotropic parameters for {(Hdbabh)MnI(μ- <i>N</i> -dbabh)} <sub>2</sub> .                                                             |

**Figure 1.** Fully labeled drawing of  $[\text{PhBP}^{i\text{Pr}}_3]\text{MnCl}$  (**1a**). Displacement ellipsoid (50%) representation. Hydrogen atoms have been omitted for clarity.

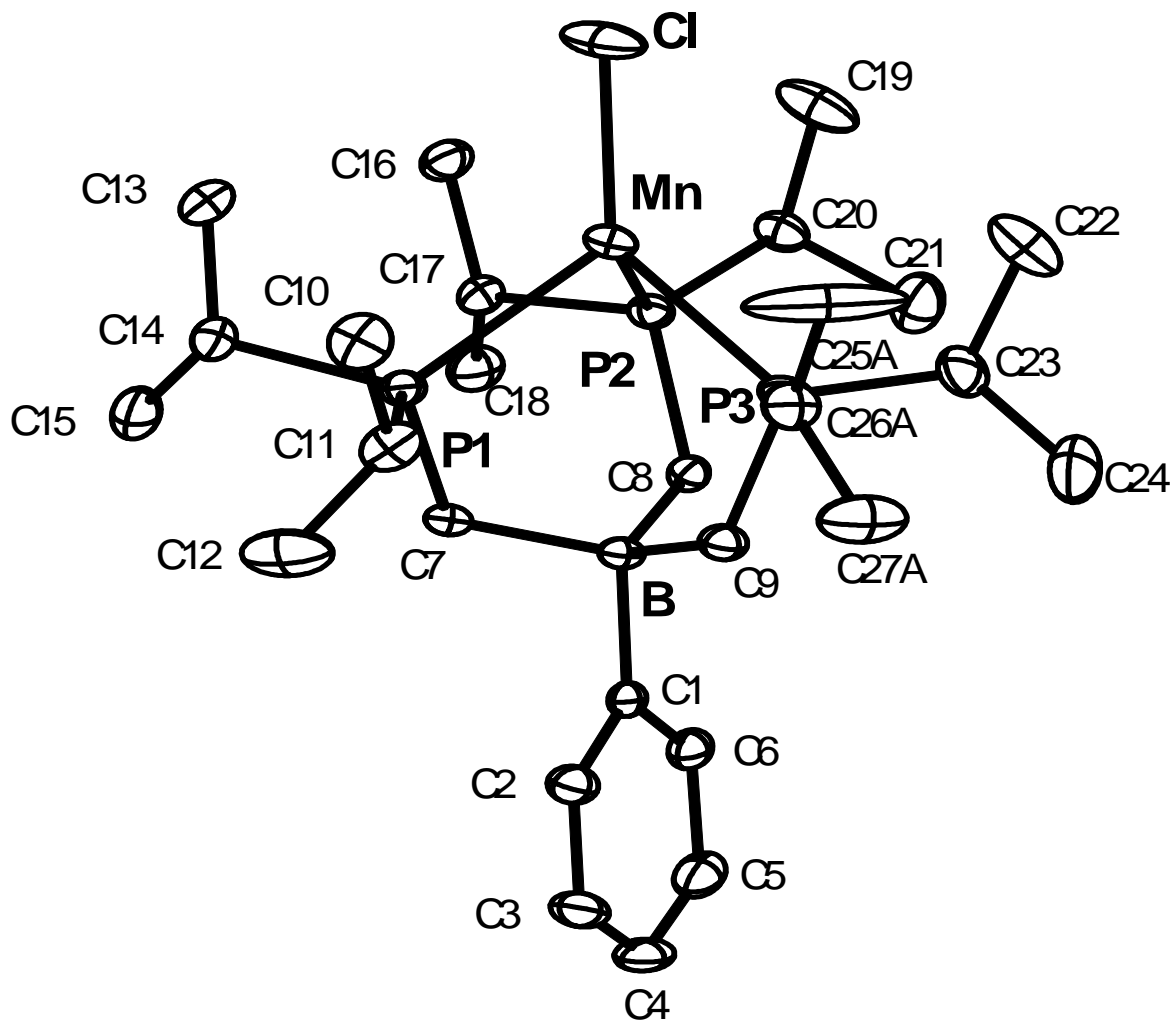

**Figure 2.** Fully labeled drawing of  $\{[\text{PhBP}^{i\text{Pr}}_3]\text{Mn}(\mu\text{-Cl})\}_2$  (**1b**). Displacement ellipsoid (50%) representation. Hydrogen atoms have been omitted for clarity.

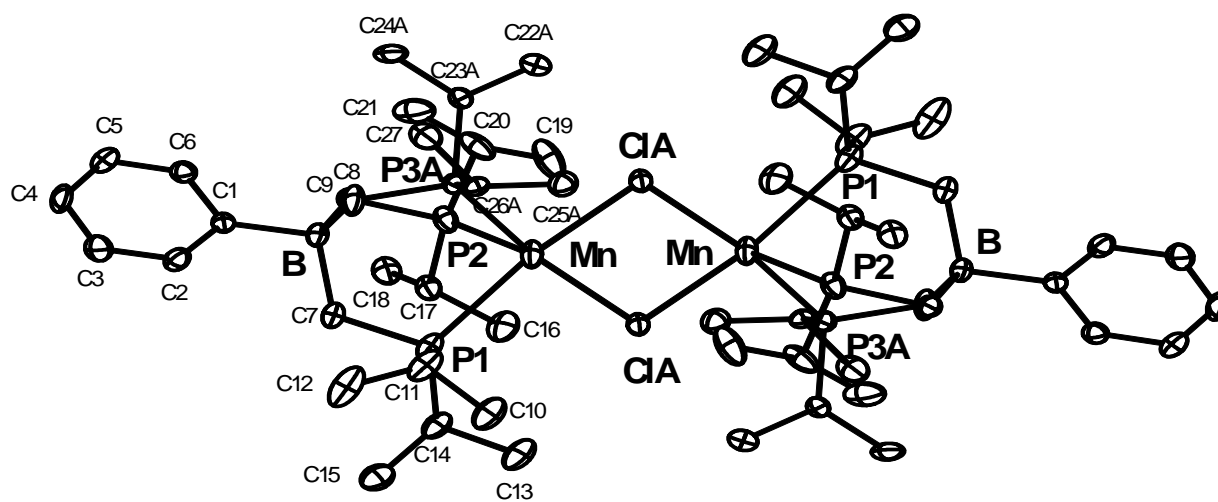

**Figure 3.** Fully labeled drawing of  $[\text{PhBP}^{\text{iPr}}_3]\text{MnI}$  (**2**). Displacement ellipsoid (50%) representation. Hydrogen atoms and solvent molecule have been omitted for clarity.

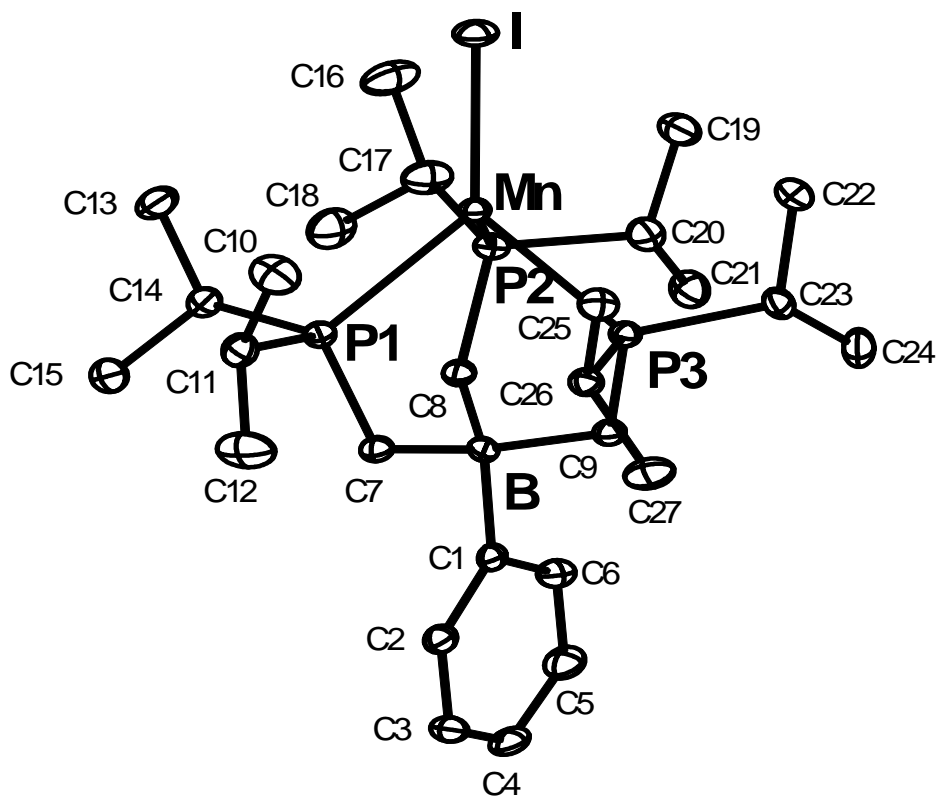

**Figure 4.** Fully labeled drawing of  $[\text{PhBP}^{\text{iPr}}_3]\text{Mn}(\text{N}_3)$  (**3**). Displacement ellipsoid (50%) representation. Two molecules were present in the asymmetric unit, but only one is shown. Hydrogen atoms have been omitted for clarity.

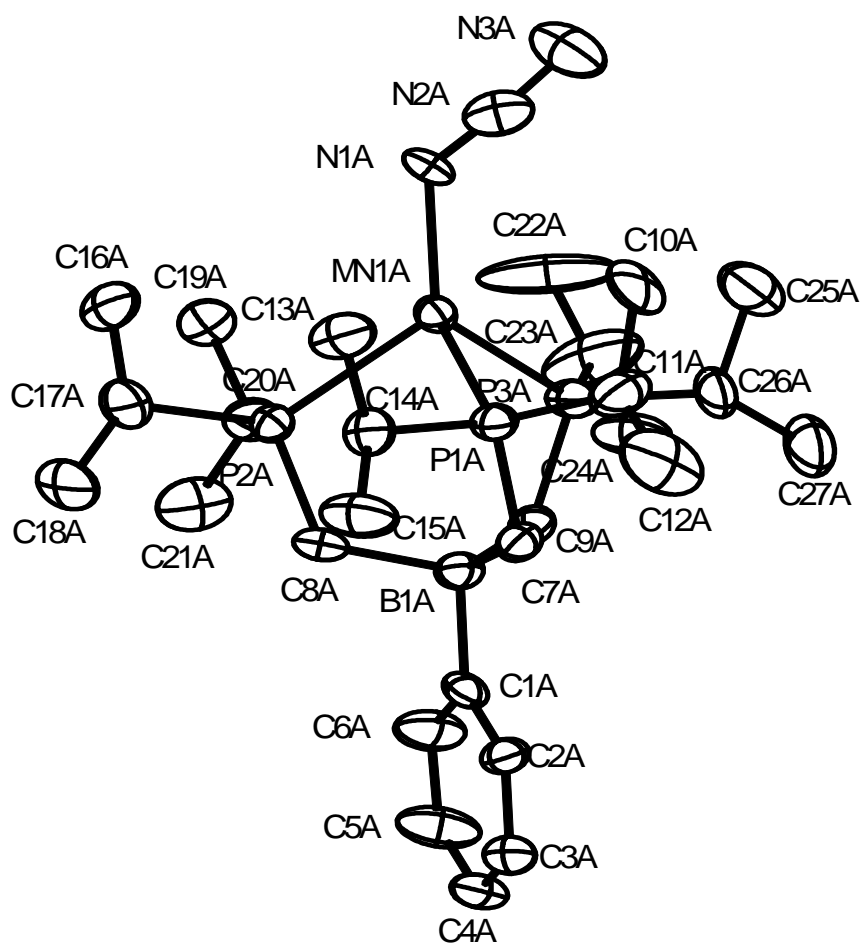



**Figure 6.** Fully labeled drawing of  $[\text{PhBP}^{i\text{Pr}}_3]\text{Mn}(\text{NH}(2,6\text{-}i\text{Pr}_2\text{-C}_6\text{H}_3))$  (**6**). Displacement ellipsoid (50%) representation. Hydrogen atoms have been omitted for clarity.

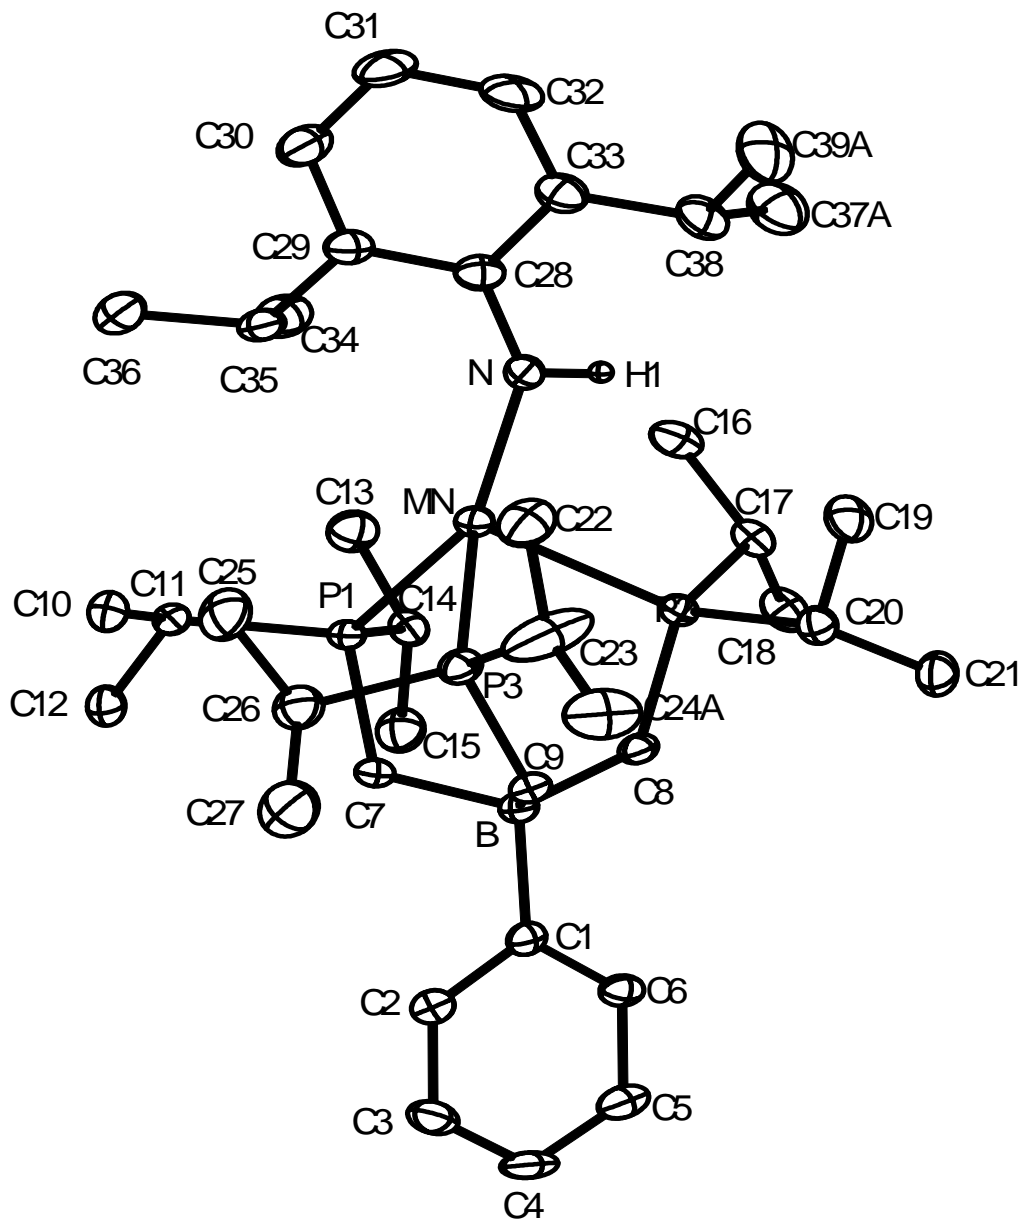



**Figure 7.** Fully labeled drawing of  $[\text{PhBP}^{\text{iPr}}_3]\text{Mn}(\text{dbabh})$  (**7**). Displacement ellipsoid (50%) representation. Hydrogen atoms have been omitted for clarity.

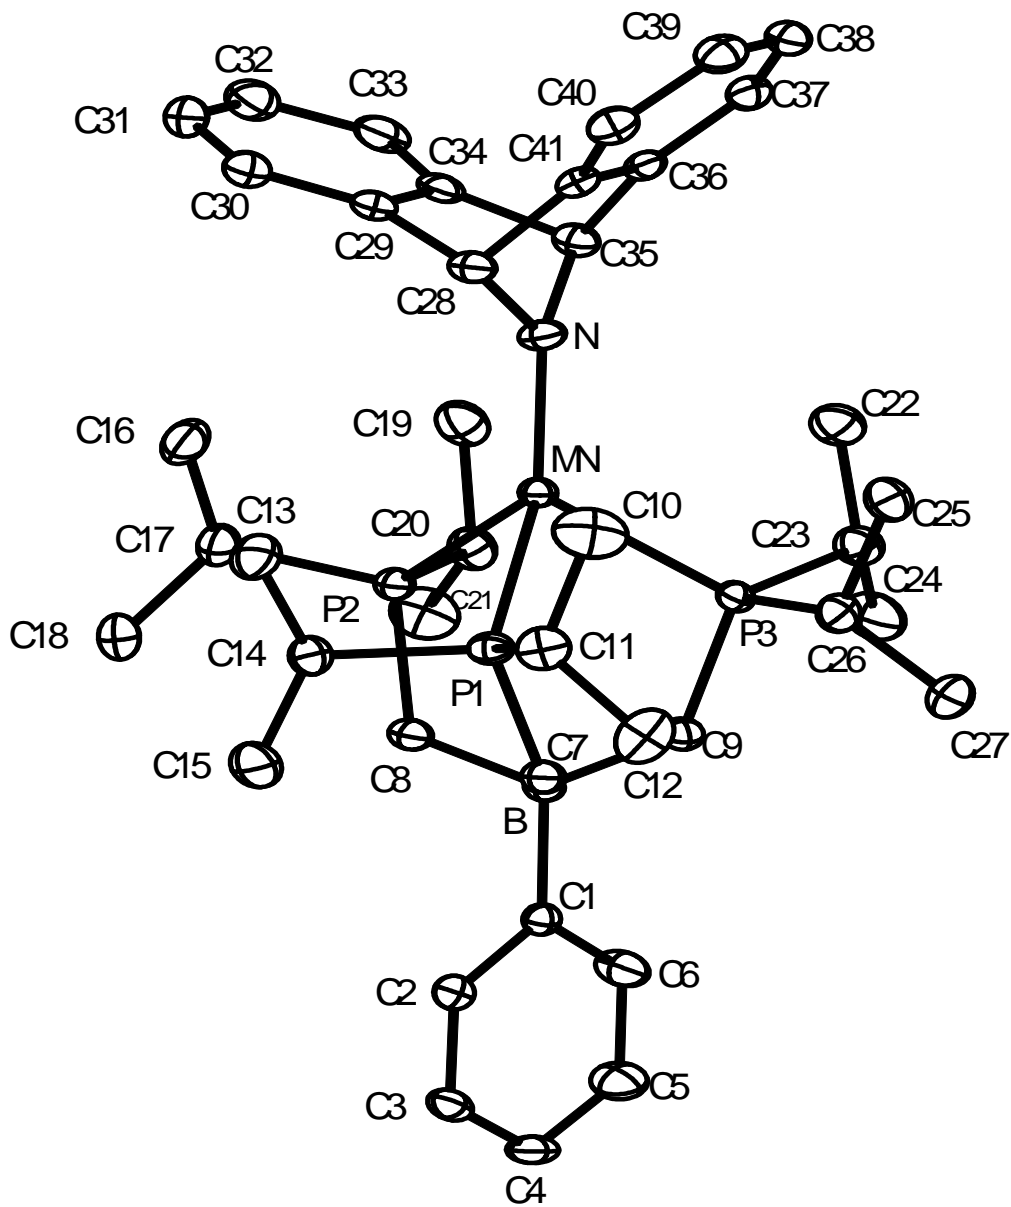

**Figure 8.** Fully labeled drawing of  $[\text{PhBP}^{\text{iPr}}_3]\text{Mn}(1\text{-Ph(isoindolate)})$  (**8**). Displacement ellipsoid (50%) representation (C2-C6 are isotropic). Hydrogen atoms and solvent molecules have been omitted for clarity.

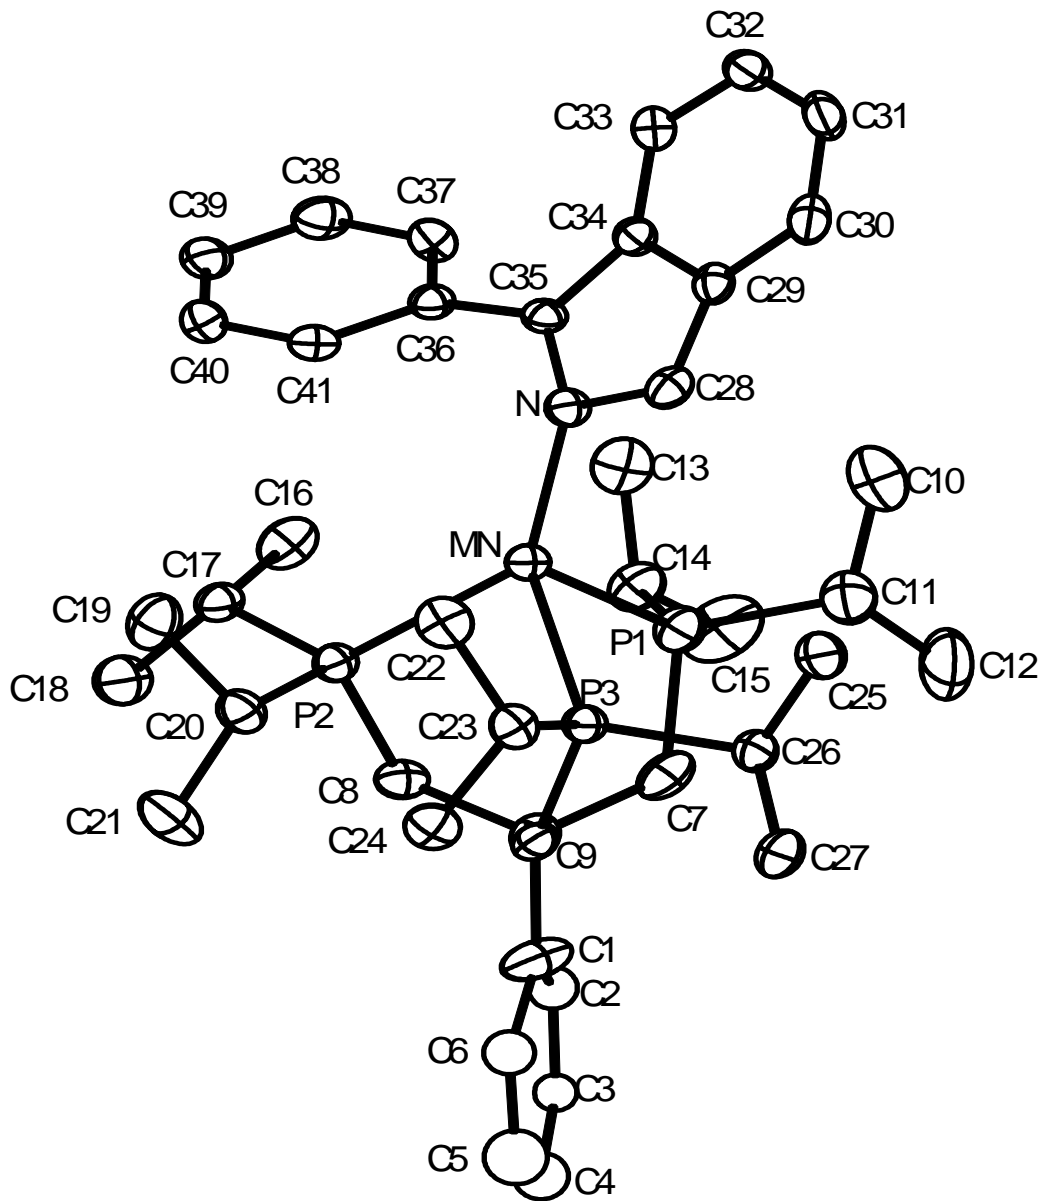

**Figure 9.** Fully labeled drawing of  $[\text{PhBP}^{\text{iPr}}_3]\text{Tl-MnBr}(\text{CO})_4$  (**9**). Displacement ellipsoid (50%) representation. Hydrogen atoms have been omitted for clarity.

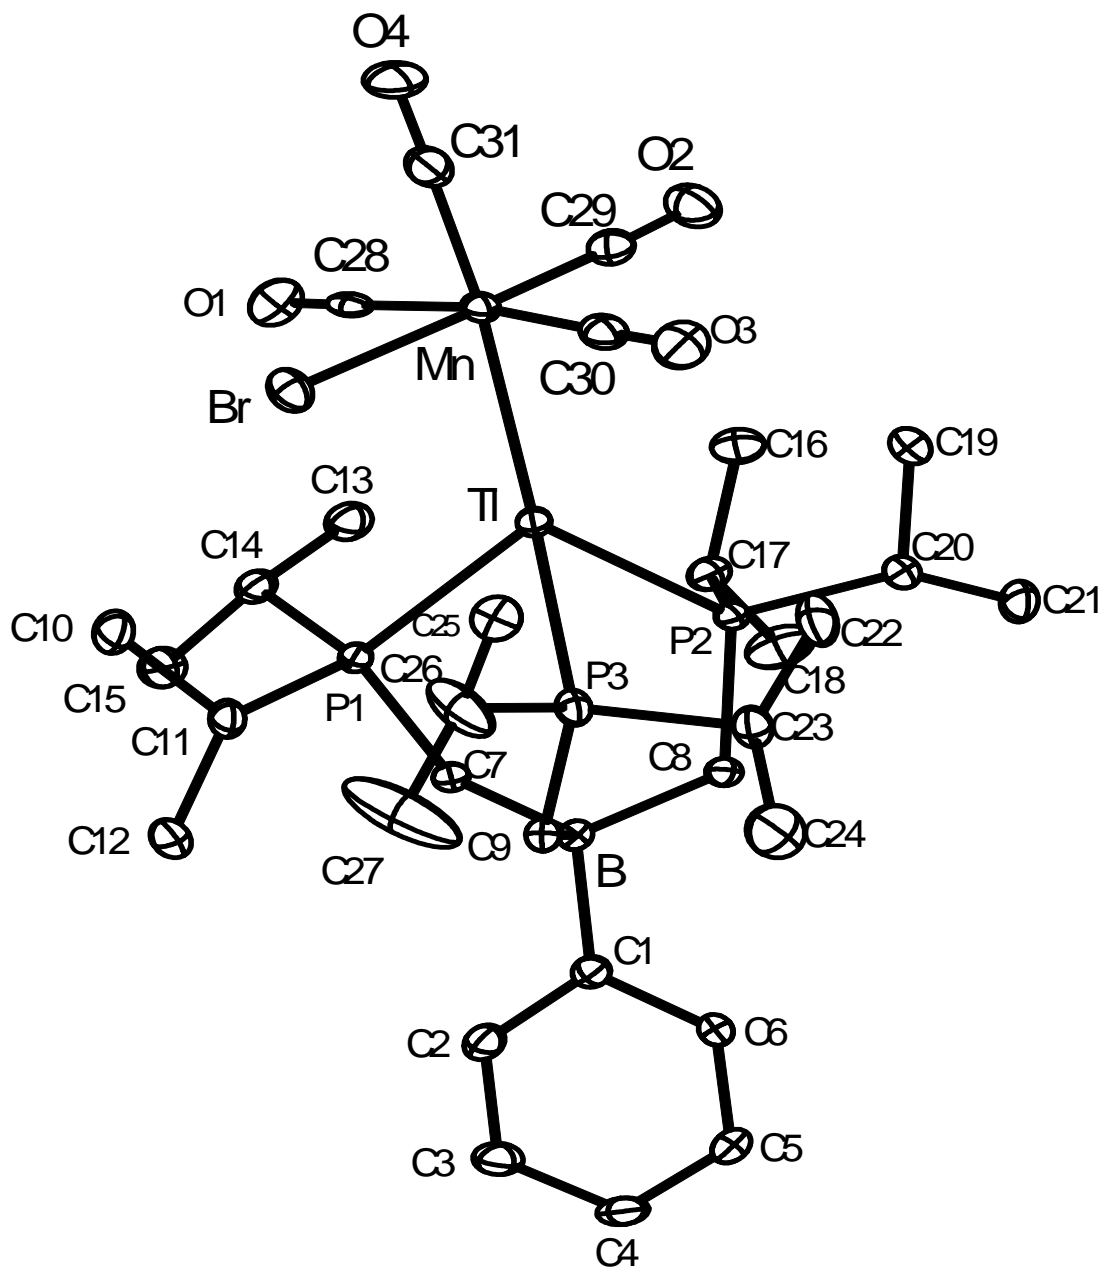

**Figure 10.** Fully labeled drawing of  $[\text{PhBP}^{i\text{Pr}}_3]\text{Mn}(\text{CN}^i\text{Bu})_3$  (**10**). Displacement ellipsoid (50%) representation. Hydrogen atoms have been omitted for clarity.

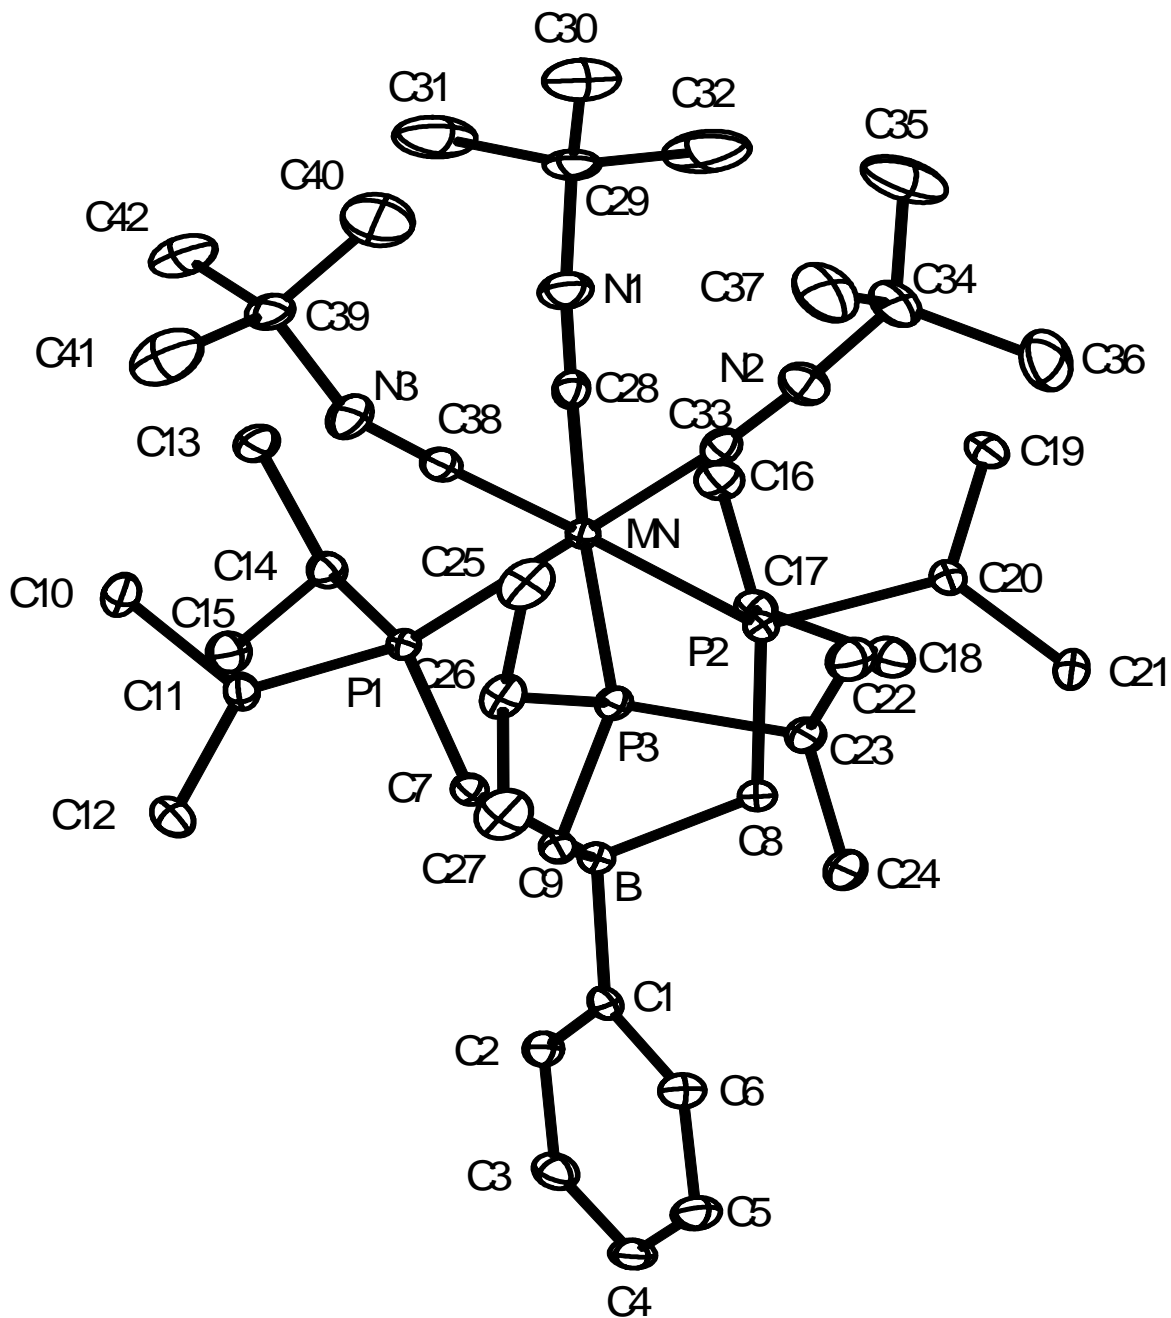

**Figure 11.** Fully labeled drawing of  $\{(\text{Hdbabh})\text{MnI}(\mu\text{-}N\text{-dbabh})\}_2$ . Displacement ellipsoid (50%) representation for only Mn and I atoms. (The remaining atoms are isotropic.) Hydrogen and solvent atoms have been omitted for clarity.

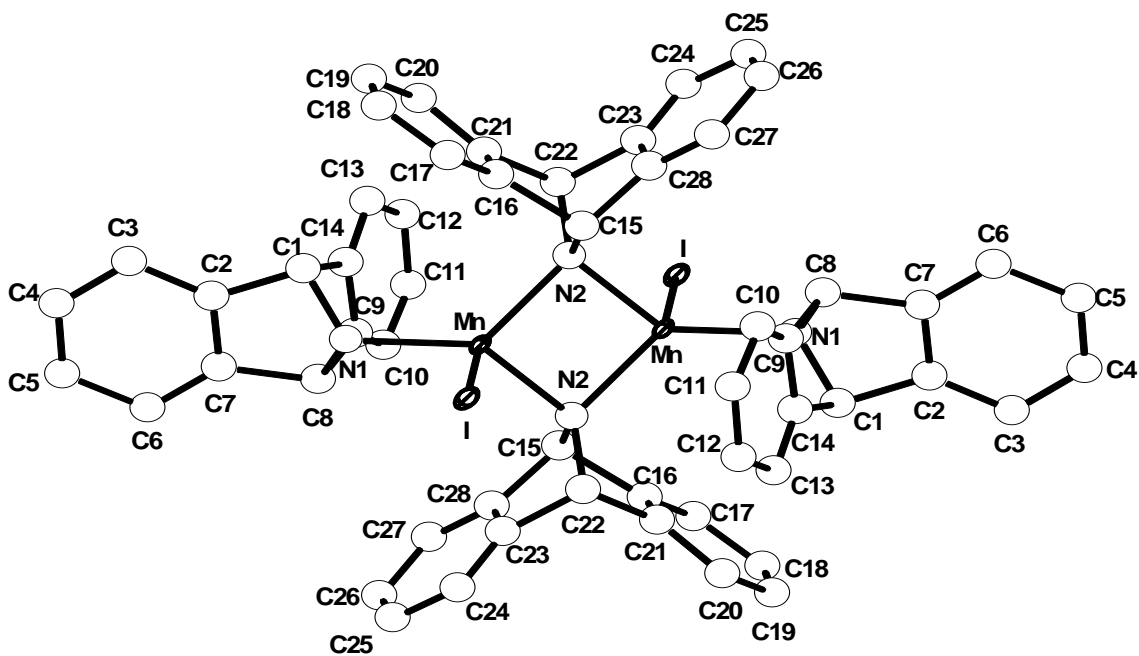

**Table 1. Crystal Data and Structure Analysis Details for [PhBP<sup>i</sup>Pr<sub>3</sub>]MnCl (1a).**

|                         |                                                                                                          |
|-------------------------|----------------------------------------------------------------------------------------------------------|
| Empirical formula       | C <sub>27</sub> H <sub>53</sub> BCl <sub>0.98</sub> Mn <sub>0.98</sub> P <sub>3</sub> Tl <sub>0.02</sub> |
| Formula weight          | 573.66                                                                                                   |
| Crystallization solvent | benzene/petroleum ether                                                                                  |
| Crystal shape           | thin plate                                                                                               |
| Crystal color           | colorless                                                                                                |
| Crystal size            | 0.074 x 0.30 x 0.32 mm                                                                                   |

### Data Collection

|                                                                 |                                                       |                                       |
|-----------------------------------------------------------------|-------------------------------------------------------|---------------------------------------|
| Preliminary photograph(s)                                       | rotation                                              |                                       |
| Type of diffractometer                                          | Bruker SMART 1000                                     |                                       |
| Wavelength                                                      | 0.71073 Å MoKα                                        |                                       |
| Data collection temperature                                     | 100 K                                                 |                                       |
| Theta range for 27512 reflections used in lattice determination | 2.28 to 28.09°                                        |                                       |
| Unit cell dimensions                                            | a = 14.493(2) Å<br>b = 12.928(2) Å<br>c = 34.850(5) Å | α = 90°<br>β = 100.344(3)°<br>γ = 90° |
| Volume                                                          | 6423.8(16) Å <sup>3</sup>                             |                                       |
| Z                                                               | 8                                                     |                                       |
| Crystal system                                                  | monoclinic                                            |                                       |
| Space group                                                     | C 2/c (# 15)                                          |                                       |
| Density (calculated)                                            | 1.186 g/cm <sup>3</sup>                               |                                       |
| F(000)                                                          | 2461                                                  |                                       |
| Theta range for data collection                                 | 2.1 to 28.6°                                          |                                       |
| Completeness to theta = 28.56°                                  | 93.8%                                                 |                                       |
| Index ranges                                                    | -18 ≤ h ≤ 19, -17 ≤ k ≤ 16, -46 ≤ l ≤ 45              |                                       |
| Data collection scan type                                       | ω scans                                               |                                       |
| Reflections collected                                           | 46909                                                 |                                       |
| Independent reflections                                         | 7671 [R <sub>int</sub> = 0.0705]                      |                                       |
| Reflections > 2σ(I)                                             | 6237                                                  |                                       |
| Average σ(I)/(net I)                                            | 0.0414                                                |                                       |
| Absorption coefficient                                          | 0.73 mm <sup>-1</sup>                                 |                                       |
| Absorption correction                                           | none                                                  |                                       |
| Reflections monitored for decay                                 | initial data recollected at end                       |                                       |
| Decay of standards                                              | 0%                                                    |                                       |

**Table 1 (cont.)****Structure Solution and Refinement**

|                                             |                                                                                             |
|---------------------------------------------|---------------------------------------------------------------------------------------------|
| Primary solution method                     | direct methods                                                                              |
| Secondary solution method                   | difference map                                                                              |
| Hydrogen placement                          | calculated                                                                                  |
| Refinement method                           | Full-matrix least-squares on F <sup>2</sup>                                                 |
| Data / restraints / parameters              | 7671 / 0 / 345                                                                              |
| Treatment of hydrogen atoms                 | not refined, U <sub>iso</sub> fixed at 120% U <sub>eq</sub> of attached atom                |
| Goodness-of-fit on F <sup>2</sup>           | 1.90                                                                                        |
| Final R indices [I>2σ(I), 6237 reflections] | R1 = 0.0422, wR2 = 0.0720                                                                   |
| R indices (all data)                        | R1 = 0.0556, wR2 = 0.0731                                                                   |
| Type of weighting scheme used               | sigma                                                                                       |
| Weighting scheme used                       | calc w=1/[σ <sup>2</sup> (Fo <sup>2</sup> )] where P=(Fo <sup>2</sup> +2Fc <sup>2</sup> )/3 |
| Max shift/error                             | 0.001                                                                                       |
| Average shift/error                         | 0.000                                                                                       |
| Largest diff. peak and hole                 | 0.51 and -0.46 e·Å <sup>-3</sup>                                                            |

**Programs Used**

|                      |                     |
|----------------------|---------------------|
| Cell refinement      | Bruker SMART 5.606  |
| Data collection      | Bruker SMART 5.054  |
| Data reduction       | Bruker SAINT 6.45   |
| Structure solution   | Bruker SHELXTL 6.14 |
| Structure refinement | Bruker SHELXTL 6.14 |

**Special Refinement Details**

A small amount of Tl[Ligand] had cocrystallized with compound **1a** and was modeled. The population for Tl[Ligand] was refined to be 1.7%, and 98.3% for **1a**. One of the isopropyl groups of the ligand was disordered in two positions and was modeled. The populations of two positions were refined to be 52.1 and 47.9 %. In the disordered isopropyl unit, C25B and C26B were given a BIND constraint.

Refinement of F<sup>2</sup> against ALL reflections. The weighted R-factor (wR) and goodness of fit (S) are based on F<sup>2</sup>, conventional R-factors (R) are based on F, with F set to zero for negative F<sup>2</sup>. The threshold expression of F<sup>2</sup> > 2σ(F<sup>2</sup>) is used only for calculating R-factors(gt) etc. and is not relevant to the choice of reflections for refinement. R-factors based on F<sup>2</sup> are statistically about twice as large as those based on F, and R-factors based on ALL data will be even larger.

All esds (except the esd in the dihedral angle between two l.s. planes) are estimated using the full covariance matrix. The cell esds are taken into account individually in the estimation of esds in distances, angles and torsion angles; correlations between esds in cell parameters are only used when they are defined by crystal symmetry. An approximate (isotropic) treatment of cell esds is used for estimating esds involving l.s. planes.

**Table 2. Atomic coordinates ( $\times 10^4$ ) and equivalent isotropic displacement parameters ( $\text{\AA}^2 \times 10^3$ ) for  $[\text{PhBP}^{i\text{Pr}}_3]\text{MnCl}$  (1a).  $U_{\text{eq}}$  is defined as one third of the trace of the orthogonalized  $U^{ij}$  tensor.**

|        | x          | y           | z          | $U_{\text{eq}}$ |
|--------|------------|-------------|------------|-----------------|
| Mn     | 2102.8(2)  | 4035.2(3)   | 1412.5(1)  | 19.0(1)         |
| P(1)   | 1376.4(3)  | 2599.7(3)   | 1752.2(1)  | 17.1(1)         |
| P(2)   | 1241.7(3)  | 3412.0(3)   | 757.1(1)   | 16.4(1)         |
| P(3)   | 3534.7(3)  | 2955.3(4)   | 1368.1(1)  | 22.1(1)         |
| Cl     | 2095.5(4)  | 5738.1(4)   | 1569.1(2)  | 39.6(2)         |
| B      | 1977.4(13) | 1389.7(14)  | 1098.7(5)  | 15.6(4)         |
| Tl     | 2209(4)    | 4565(5)     | 1493.3(15) | 27(2)           |
| C(1)   | 1983.4(11) | 155.5(12)   | 982.7(5)   | 17.0(4)         |
| C(2)   | 2242.0(12) | -585.2(13)  | 1276.7(6)  | 22.4(4)         |
| C(3)   | 2307.0(13) | -1636.4(14) | 1201.0(6)  | 29.7(5)         |
| C(4)   | 2125.6(13) | -1987.3(14) | 821.5(6)   | 32.0(5)         |
| C(5)   | 1869.2(13) | -1288.3(15) | 521.7(6)   | 29.0(5)         |
| C(6)   | 1794.6(12) | -235.3(14)  | 602.2(5)   | 21.2(4)         |
| C(7)   | 1243.0(12) | 1502.5(12)  | 1417.1(5)  | 16.3(4)         |
| C(8)   | 1615.3(12) | 2085.5(12)  | 696.5(5)   | 16.5(4)         |
| C(9)   | 3102.9(12) | 1629.1(13)  | 1294.0(5)  | 19.1(4)         |
| C(10)  | 2403.2(14) | 3036.9(16)  | 2488.2(5)  | 31.9(5)         |
| C(11)  | 2202.7(14) | 2155.3(15)  | 2191.0(5)  | 27.6(4)         |
| C(12)  | 1903.2(18) | 1157.6(16)  | 2373.7(6)  | 45.3(6)         |
| C(13)  | -36.5(15)  | 3941.2(15)  | 1905.9(6)  | 36.8(5)         |
| C(14)  | 270.8(13)  | 2811.3(14)  | 1948.7(5)  | 23.5(4)         |
| C(15)  | -521.6(14) | 2074.3(16)  | 1789.7(6)  | 32.7(5)         |
| C(16)  | -444.6(13) | 4433.8(14)  | 778.8(5)   | 23.5(4)         |
| C(17)  | -30.5(12)  | 3344.3(13)  | 771.8(5)   | 19.4(4)         |
| C(18)  | -596.2(13) | 2680.4(14)  | 448.2(5)   | 26.7(4)         |
| C(19)  | 1564.6(17) | 5287.0(15)  | 406.3(6)   | 41.0(6)         |
| C(20)  | 1253.2(13) | 4179.7(13)  | 301.3(5)   | 22.3(4)         |
| C(21)  | 1838.7(16) | 3707.2(18)  | 28.3(6)    | 41.2(6)         |
| C(22)  | 4256.8(17) | 4437.5(17)  | 909.0(7)   | 46.0(6)         |
| C(23)  | 3959.4(13) | 3305.1(15)  | 915.3(6)   | 29.1(5)         |
| C(24)  | 4719.0(18) | 2604(2)     | 807.3(9)   | 62.6(8)         |
| C(25A) | 4788(9)    | 3849(10)    | 1932(4)    | 96(6)           |
| C(26A) | 4450(7)    | 2931(7)     | 1823(3)    | 25.3(15)        |
| C(27A) | 5158(8)    | 2065(10)    | 1838(4)    | 45(3)           |
| C(25B) | 4876(8)    | 4041(8)     | 1923(3)    | 47(2)           |
| C(26B) | 4701(6)    | 2959(6)     | 1708(3)    | 26.6(14)        |
| C(27B) | 4887(8)    | 1996(10)    | 1957(4)    | 53(3)           |



**Table 3. Bond lengths [ $\text{\AA}$ ] and angles [ $^\circ$ ] for  $[\text{PhBP}^{i\text{Pr}}_3]\text{MnCl}$  (1a).**

|              |            |               |           |
|--------------|------------|---------------|-----------|
| Mn-Cl        | 2.2687(7)  | C(14)-C(15)   | 1.518(3)  |
| Mn-P(3)      | 2.5289(6)  | C(14)-H(14)   | 1.0000    |
| Mn-P(2)      | 2.5298(6)  | C(15)-H(15A)  | 0.9800    |
| Mn-P(1)      | 2.5300(6)  | C(15)-H(15B)  | 0.9800    |
| P(1)-C(7)    | 1.8252(16) | C(15)-H(15C)  | 0.9800    |
| P(1)-C(11)   | 1.8562(18) | C(16)-C(17)   | 1.533(2)  |
| P(1)-C(14)   | 1.8724(18) | C(16)-H(16A)  | 0.9800    |
| P(1)-Ti      | 3.019(6)   | C(16)-H(16B)  | 0.9800    |
| P(2)-C(8)    | 1.8219(17) | C(16)-H(16C)  | 0.9800    |
| P(2)-C(17)   | 1.8558(18) | C(17)-C(18)   | 1.533(2)  |
| P(2)-C(20)   | 1.8759(17) | C(17)-H(17)   | 1.0000    |
| P(2)-Ti      | 3.079(6)   | C(18)-H(18A)  | 0.9800    |
| P(3)-C(9)    | 1.8275(17) | C(18)-H(18B)  | 0.9800    |
| P(3)-C(23)   | 1.850(2)   | C(18)-H(18C)  | 0.9800    |
| P(3)-C(26A)  | 1.877(8)   | C(19)-C(20)   | 1.526(3)  |
| P(3)-C(26B)  | 1.882(8)   | C(19)-H(19A)  | 0.9800    |
| P(3)-Ti      | 2.918(6)   | C(19)-H(19B)  | 0.9800    |
| B-C(1)       | 1.646(2)   | C(19)-H(19C)  | 0.9800    |
| B-C(8)       | 1.669(2)   | C(20)-C(21)   | 1.512(3)  |
| B-C(7)       | 1.676(2)   | C(20)-H(20)   | 1.0000    |
| B-C(9)       | 1.680(3)   | C(21)-H(21A)  | 0.9800    |
| C(1)-C(6)    | 1.399(2)   | C(21)-H(21B)  | 0.9800    |
| C(1)-C(2)    | 1.404(2)   | C(21)-H(21C)  | 0.9800    |
| C(2)-C(3)    | 1.391(2)   | C(22)-C(23)   | 1.527(3)  |
| C(2)-H(2)    | 0.9500     | C(22)-H(22A)  | 0.9800    |
| C(3)-C(4)    | 1.378(3)   | C(22)-H(22B)  | 0.9800    |
| C(3)-H(3)    | 0.9500     | C(22)-H(22C)  | 0.9800    |
| C(4)-C(5)    | 1.381(3)   | C(23)-C(24)   | 1.524(3)  |
| C(4)-H(4)    | 0.9500     | C(23)-H(23)   | 1.0000    |
| C(5)-C(6)    | 1.398(2)   | C(24)-H(24A)  | 0.9800    |
| C(5)-H(5)    | 0.9500     | C(24)-H(24B)  | 0.9800    |
| C(6)-H(6)    | 0.9500     | C(24)-H(24C)  | 0.9800    |
| C(7)-H(7A)   | 0.9900     | C(25A)-C(26A) | 1.314(16) |
| C(7)-H(7B)   | 0.9900     | C(25A)-H(25A) | 0.9800    |
| C(8)-H(8A)   | 0.9900     | C(25A)-H(25B) | 0.9800    |
| C(8)-H(8B)   | 0.9900     | C(25A)-H(25C) | 0.9800    |
| C(9)-H(9A)   | 0.9900     | C(26A)-C(27A) | 1.512(16) |
| C(9)-H(9B)   | 0.9900     | C(26A)-H(26A) | 1.0000    |
| C(10)-C(11)  | 1.532(3)   | C(27A)-H(27A) | 0.9800    |
| C(10)-H(10A) | 0.9800     | C(27A)-H(27B) | 0.9800    |
| C(10)-H(10B) | 0.9800     | C(27A)-H(27C) | 0.9800    |
| C(10)-H(10C) | 0.9800     | C(25B)-C(26B) | 1.586(14) |
| C(11)-C(12)  | 1.535(3)   | C(25B)-H(25D) | 0.9800    |
| C(11)-H(11)  | 1.0000     | C(25B)-H(25E) | 0.9800    |
| C(12)-H(12A) | 0.9800     | C(25B)-H(25F) | 0.9800    |
| C(12)-H(12B) | 0.9800     | C(26B)-C(27B) | 1.514(16) |
| C(12)-H(12C) | 0.9800     | C(26B)-H(26B) | 1.0000    |
| C(13)-C(14)  | 1.527(3)   | C(27B)-H(27D) | 0.9800    |
| C(13)-H(13A) | 0.9800     | C(27B)-H(27E) | 0.9800    |
| C(13)-H(13B) | 0.9800     | C(27B)-H(27F) | 0.9800    |
| C(13)-H(13C) | 0.9800     | Cl-Mn-P(3)    | 126.14(2) |

|                    |            |                     |            |
|--------------------|------------|---------------------|------------|
| Cl-Mn-P(2)         | 120.22(2)  | P(3)-Mn-P(2)        | 92.64(2)   |
| Cl-Mn-P(1)         | 125.38(2)  | C(4)-C(3)-C(2)      | 119.73(18) |
| P(3)-Mn-P(1)       | 92.22(2)   | C(4)-C(3)-H(3)      | 120.1      |
| P(2)-Mn-P(1)       | 90.55(2)   | C(2)-C(3)-H(3)      | 120.1      |
| C(7)-P(1)-C(11)    | 105.38(8)  | C(3)-C(4)-C(5)      | 119.33(18) |
| C(7)-P(1)-C(14)    | 110.38(8)  | C(3)-C(4)-H(4)      | 120.3      |
| C(11)-P(1)-C(14)   | 102.23(9)  | C(5)-C(4)-H(4)      | 120.3      |
| C(7)-P(1)-Mn       | 106.02(6)  | C(4)-C(5)-C(6)      | 120.35(18) |
| C(11)-P(1)-Mn      | 110.57(7)  | C(4)-C(5)-H(5)      | 119.8      |
| C(14)-P(1)-Mn      | 121.28(6)  | C(6)-C(5)-H(5)      | 119.8      |
| C(7)-P(1)-Ti       | 117.71(13) | C(5)-C(6)-C(1)      | 122.20(17) |
| C(11)-P(1)-Ti      | 105.86(12) | C(5)-C(6)-H(6)      | 118.9      |
| C(14)-P(1)-Ti      | 113.61(12) | C(1)-C(6)-H(6)      | 118.9      |
| Mn-P(1)-Ti         | 11.69(11)  | B-C(7)-P(1)         | 118.96(11) |
| C(8)-P(2)-C(17)    | 106.04(8)  | B-C(7)-H(7A)        | 107.6      |
| C(8)-P(2)-C(20)    | 110.60(8)  | P(1)-C(7)-H(7A)     | 107.6      |
| C(17)-P(2)-C(20)   | 102.02(8)  | B-C(7)-H(7B)        | 107.6      |
| C(8)-P(2)-Mn       | 107.20(6)  | P(1)-C(7)-H(7B)     | 107.6      |
| C(17)-P(2)-Mn      | 108.76(6)  | H(7A)-C(7)-H(7B)    | 107.0      |
| C(20)-P(2)-Mn      | 121.21(6)  | B-C(8)-P(2)         | 117.72(11) |
| C(8)-P(2)-Ti       | 116.87(12) | B-C(8)-H(8A)        | 107.9      |
| C(17)-P(2)-Ti      | 107.81(11) | P(2)-C(8)-H(8A)     | 107.9      |
| C(20)-P(2)-Ti      | 112.19(12) | B-C(8)-H(8B)        | 107.9      |
| Mn-P(2)-Ti         | 10.39(11)  | P(2)-C(8)-H(8B)     | 107.9      |
| C(9)-P(3)-C(23)    | 105.48(8)  | H(8A)-C(8)-H(8B)    | 107.2      |
| C(9)-P(3)-C(26A)   | 106.0(3)   | B-C(9)-P(3)         | 120.87(11) |
| C(23)-P(3)-C(26A)  | 115.6(4)   | B-C(9)-H(9A)        | 107.1      |
| C(9)-P(3)-C(26B)   | 109.7(3)   | P(3)-C(9)-H(9A)     | 107.1      |
| C(23)-P(3)-C(26B)  | 97.9(3)    | B-C(9)-H(9B)        | 107.1      |
| C(26A)-P(3)-C(26B) | 18.08(18)  | P(3)-C(9)-H(9B)     | 107.1      |
| C(9)-P(3)-Mn       | 105.22(6)  | H(9A)-C(9)-H(9B)    | 106.8      |
| C(23)-P(3)-Mn      | 108.65(6)  | C(11)-C(10)-H(10A)  | 109.5      |
| C(26A)-P(3)-Mn     | 114.9(3)   | C(11)-C(10)-H(10B)  | 109.5      |
| C(26B)-P(3)-Mn     | 127.9(3)   | H(10A)-C(10)-H(10B) | 109.5      |
| C(9)-P(3)-Ti       | 118.18(14) | C(11)-C(10)-H(10C)  | 109.5      |
| C(23)-P(3)-Ti      | 106.39(12) | H(10A)-C(10)-H(10C) | 109.5      |
| C(26A)-P(3)-Ti     | 105.7(3)   | H(10B)-C(10)-H(10C) | 109.5      |
| C(26B)-P(3)-Ti     | 116.5(3)   | C(10)-C(11)-C(12)   | 112.21(16) |
| Mn-P(3)-Ti         | 13.46(12)  | C(10)-C(11)-P(1)    | 110.04(13) |
| C(1)-B-C(8)        | 109.33(13) | C(12)-C(11)-P(1)    | 114.40(14) |
| C(1)-B-C(7)        | 106.19(13) | C(10)-C(11)-H(11)   | 106.6      |
| C(8)-B-C(7)        | 111.58(13) | C(12)-C(11)-H(11)   | 106.6      |
| C(1)-B-C(9)        | 103.33(13) | P(1)-C(11)-H(11)    | 106.6      |
| C(8)-B-C(9)        | 112.16(14) | C(11)-C(12)-H(12A)  | 109.5      |
| C(7)-B-C(9)        | 113.67(14) | C(11)-C(12)-H(12B)  | 109.5      |
| P(3)-Ti-P(1)       | 75.74(16)  | H(12A)-C(12)-H(12B) | 109.5      |
| P(3)-Ti-P(2)       | 75.14(16)  | C(11)-C(12)-H(12C)  | 109.5      |
| P(1)-Ti-P(2)       | 72.24(16)  | H(12A)-C(12)-H(12C) | 109.5      |
| C(6)-C(1)-C(2)     | 115.26(16) | H(12B)-C(12)-H(12C) | 109.5      |
| C(6)-C(1)-B        | 125.02(15) | C(14)-C(13)-H(13A)  | 109.5      |
| C(2)-C(1)-B        | 119.63(15) | C(14)-C(13)-H(13B)  | 109.5      |
| C(3)-C(2)-C(1)     | 123.13(18) | H(13A)-C(13)-H(13B) | 109.5      |
| C(3)-C(2)-H(2)     | 118.4      | C(14)-C(13)-H(13C)  | 109.5      |
| C(1)-C(2)-H(2)     | 118.4      | H(13A)-C(13)-H(13C) | 109.5      |

|                     |            |                      |            |
|---------------------|------------|----------------------|------------|
| H(13B)-C(13)-H(13C) | 109.5      | C(20)-C(21)-H(21C)   | 109.5      |
| C(15)-C(14)-C(13)   | 112.12(16) | H(21A)-C(21)-H(21C)  | 109.5      |
| C(15)-C(14)-P(1)    | 114.57(13) | H(21B)-C(21)-H(21C)  | 109.5      |
| C(13)-C(14)-P(1)    | 110.97(13) | C(23)-C(22)-H(22A)   | 109.5      |
| C(15)-C(14)-H(14)   | 106.2      | C(23)-C(22)-H(22B)   | 109.5      |
| C(13)-C(14)-H(14)   | 106.2      | H(22A)-C(22)-H(22B)  | 109.5      |
| P(1)-C(14)-H(14)    | 106.2      | C(23)-C(22)-H(22C)   | 109.5      |
| C(14)-C(15)-H(15A)  | 109.5      | H(22A)-C(22)-H(22C)  | 109.5      |
| C(14)-C(15)-H(15B)  | 109.5      | H(22B)-C(22)-H(22C)  | 109.5      |
| H(15A)-C(15)-H(15B) | 109.5      | C(24)-C(23)-C(22)    | 110.36(18) |
| C(14)-C(15)-H(15C)  | 109.5      | C(24)-C(23)-P(3)     | 115.53(15) |
| H(15A)-C(15)-H(15C) | 109.5      | C(22)-C(23)-P(3)     | 112.63(14) |
| H(15B)-C(15)-H(15C) | 109.5      | C(24)-C(23)-H(23)    | 105.8      |
| C(17)-C(16)-H(16A)  | 109.5      | C(22)-C(23)-H(23)    | 105.8      |
| C(17)-C(16)-H(16B)  | 109.5      | P(3)-C(23)-H(23)     | 105.8      |
| H(16A)-C(16)-H(16B) | 109.5      | C(23)-C(24)-H(24A)   | 109.5      |
| C(17)-C(16)-H(16C)  | 109.5      | C(23)-C(24)-H(24B)   | 109.5      |
| H(16A)-C(16)-H(16C) | 109.5      | H(24A)-C(24)-H(24B)  | 109.5      |
| H(16B)-C(16)-H(16C) | 109.5      | C(23)-C(24)-H(24C)   | 109.5      |
| C(18)-C(17)-C(16)   | 111.54(15) | H(24A)-C(24)-H(24C)  | 109.5      |
| C(18)-C(17)-P(2)    | 114.14(12) | H(24B)-C(24)-H(24C)  | 109.5      |
| C(16)-C(17)-P(2)    | 110.55(12) | C(26A)-C(25A)-H(25A) | 109.5      |
| C(18)-C(17)-H(17)   | 106.7      | C(26A)-C(25A)-H(25B) | 109.5      |
| C(16)-C(17)-H(17)   | 106.7      | H(25A)-C(25A)-H(25B) | 109.5      |
| P(2)-C(17)-H(17)    | 106.7      | C(26A)-C(25A)-H(25C) | 109.5      |
| C(17)-C(18)-H(18A)  | 109.5      | H(25A)-C(25A)-H(25C) | 109.5      |
| C(17)-C(18)-H(18B)  | 109.5      | H(25B)-C(25A)-H(25C) | 109.5      |
| H(18A)-C(18)-H(18B) | 109.5      | C(25A)-C(26A)-C(27A) | 116.3(10)  |
| C(17)-C(18)-H(18C)  | 109.5      | C(25A)-C(26A)-P(3)   | 113.5(7)   |
| H(18A)-C(18)-H(18C) | 109.5      | C(27A)-C(26A)-P(3)   | 114.4(8)   |
| H(18B)-C(18)-H(18C) | 109.5      | C(25A)-C(26A)-H(26A) | 103.5      |
| C(20)-C(19)-H(19A)  | 109.5      | C(27A)-C(26A)-H(26A) | 103.5      |
| C(20)-C(19)-H(19B)  | 109.5      | P(3)-C(26A)-H(26A)   | 103.5      |
| H(19A)-C(19)-H(19B) | 109.5      | C(26A)-C(27A)-H(27A) | 109.5      |
| C(20)-C(19)-H(19C)  | 109.5      | C(26A)-C(27A)-H(27B) | 109.5      |
| H(19A)-C(19)-H(19C) | 109.5      | H(27A)-C(27A)-H(27B) | 109.5      |
| H(19B)-C(19)-H(19C) | 109.5      | C(26A)-C(27A)-H(27C) | 109.5      |
| C(21)-C(20)-C(19)   | 110.77(17) | H(27A)-C(27A)-H(27C) | 109.5      |
| C(21)-C(20)-P(2)    | 114.22(13) | H(27B)-C(27A)-H(27C) | 109.5      |
| C(19)-C(20)-P(2)    | 109.91(12) | C(27B)-C(26B)-C(25B) | 117.2(9)   |
| C(21)-C(20)-H(20)   | 107.2      | C(27B)-C(26B)-P(3)   | 113.9(7)   |
| C(19)-C(20)-H(20)   | 107.2      | C(25B)-C(26B)-P(3)   | 110.4(6)   |
| P(2)-C(20)-H(20)    | 107.2      | C(27B)-C(26B)-H(26B) | 104.6      |
| C(20)-C(21)-H(21A)  | 109.5      | C(25B)-C(26B)-H(26B) | 104.6      |
| C(20)-C(21)-H(21B)  | 109.5      | P(3)-C(26B)-H(26B)   | 104.6      |
| H(21A)-C(21)-H(21B) | 109.5      |                      |            |

---

Symmetry transformations used to generate equivalent atoms:

**Table 4. Anisotropic displacement parameters ( $\text{\AA}^2 \times 10^4$ ) for  $[\text{PhBP}^{\text{Pr}}_3]\text{MnCl}$  (1a). The anisotropic displacement factor exponent takes the form:  $-2\pi^2[\mathbf{h}^2\mathbf{a}^*U^{11} + \dots + 2\mathbf{h}\mathbf{k}\mathbf{a}^*\mathbf{b}^*U^{12}]$**

|        | $U^{11}$ | $U^{22}$ | $U^{33}$ | $U^{23}$ | $U^{13}$ | $U^{12}$ |
|--------|----------|----------|----------|----------|----------|----------|
| Mn     | 228(2)   | 125(2)   | 204(2)   | -2(1)    | 8(1)     | -21(1)   |
| P(1)   | 198(2)   | 143(2)   | 175(2)   | 1(2)     | 39(2)    | 15(2)    |
| P(2)   | 186(2)   | 134(2)   | 169(2)   | 19(2)    | 27(2)    | 13(2)    |
| P(3)   | 178(2)   | 156(2)   | 307(3)   | 10(2)    | -18(2)   | -40(2)   |
| Cl     | 696(4)   | 133(2)   | 325(3)   | -36(2)   | 0(3)     | -50(2)   |
| B      | 168(10)  | 111(9)   | 185(10)  | -6(7)    | 17(8)    | -3(8)    |
| C(1)   | 94(8)    | 149(9)   | 275(10)  | -20(7)   | 53(7)    | -9(7)    |
| C(2)   | 184(9)   | 175(9)   | 312(10)  | 4(8)     | 37(8)    | -3(7)    |
| C(3)   | 244(10)  | 146(9)   | 507(13)  | 42(9)    | 82(9)    | 10(8)    |
| C(4)   | 228(11)  | 130(9)   | 614(15)  | -88(9)   | 107(10)  | -28(8)   |
| C(5)   | 222(10)  | 258(10)  | 408(12)  | -152(9)  | 106(9)   | -59(8)   |
| C(6)   | 161(9)   | 198(9)   | 286(10)  | -46(7)   | 68(8)    | -14(7)   |
| C(7)   | 187(9)   | 110(8)   | 188(9)   | 4(7)     | 21(7)    | 1(7)     |
| C(8)   | 150(9)   | 153(9)   | 196(9)   | -12(7)   | 43(7)    | 1(7)     |
| C(9)   | 187(9)   | 147(8)   | 235(9)   | -12(7)   | 30(7)    | -10(7)   |
| C(10)  | 328(12)  | 394(12)  | 212(10)  | -45(8)   | -14(8)   | -8(9)    |
| C(11)  | 297(11)  | 325(11)  | 187(10)  | -1(8)    | -10(8)   | 92(9)    |
| C(12)  | 801(18)  | 278(12)  | 230(11)  | 55(9)    | -40(11)  | 141(11)  |
| C(13)  | 395(13)  | 259(11)  | 516(14)  | 0(9)     | 255(11)  | 93(9)    |
| C(14)  | 253(10)  | 230(10)  | 244(10)  | 4(8)     | 108(8)   | 26(8)    |
| C(15)  | 253(11)  | 341(12)  | 419(12)  | -45(9)   | 148(9)   | -7(9)    |
| C(16)  | 258(10)  | 212(9)   | 244(10)  | 16(7)    | 69(8)    | 70(8)    |
| C(17)  | 180(9)   | 184(9)   | 225(9)   | 8(7)     | 53(7)    | 35(7)    |
| C(18)  | 177(10)  | 256(10)  | 363(11)  | -46(8)   | 31(8)    | 4(8)     |
| C(19)  | 602(16)  | 263(12)  | 321(12)  | 132(9)   | -35(11)  | -127(10) |
| C(20)  | 265(10)  | 181(9)   | 220(9)   | 54(7)    | 38(8)    | 5(8)     |
| C(21)  | 446(14)  | 468(14)  | 379(13)  | 240(10)  | 224(11)  | 210(11)  |
| C(22)  | 486(15)  | 374(13)  | 510(15)  | 124(11)  | 64(12)   | -191(11) |
| C(23)  | 180(10)  | 287(11)  | 412(12)  | 49(9)    | 71(9)    | -46(8)   |
| C(24)  | 503(16)  | 579(17)  | 930(20)  | 196(15)  | 486(15)  | 110(13)  |
| C(25A) | 930(80)  | 230(50)  | 1270(90) | -300(40) | -980(70) | 260(50)  |
| C(26A) | 150(40)  | 260(30)  | 320(40)  | -20(30)  | -20(20)  | -20(30)  |
| C(27A) | 250(50)  | 280(40)  | 730(70)  | -60(40)  | -150(30) | 40(40)   |
| C(25B) | 570(50)  | 250(40)  | 540(40)  | -150(30) | -40(40)  | -260(30) |
| C(26B) | 190(40)  | 280(20)  | 310(40)  | -30(30)  | 0(20)    | -10(30)  |
| C(27B) | 310(50)  | 430(30)  | 720(70)  | 130(40)  | -270(40) | -100(40) |

**Table 5. Crystal Data and Structure Analysis Details for  $\{[\text{PhBP}^{\text{iPr}}_3]\text{Mn}(\mu\text{-Cl})_2\}_2$  (1b).**

|                         |                                                                         |
|-------------------------|-------------------------------------------------------------------------|
| Empirical formula       | $\text{C}_{54}\text{H}_{106}\text{B}_2\text{Cl}_2\text{Mn}_2\text{P}_6$ |
| Formula weight          | 1143.61                                                                 |
| Crystallization solvent | benzene/petroleum ether                                                 |
| Crystal shape           | rough block                                                             |
| Crystal color           | colorless                                                               |
| Crystal size            | 0.22 x 0.28 x 0.37 mm                                                   |

### Data Collection

|                                                                 |                                                       |                                                                                       |
|-----------------------------------------------------------------|-------------------------------------------------------|---------------------------------------------------------------------------------------|
| Preliminary photograph(s)                                       | rotation                                              |                                                                                       |
| Type of diffractometer                                          | Bruker SMART 1000                                     |                                                                                       |
| Wavelength                                                      | 0.71073 Å MoK $\alpha$                                |                                                                                       |
| Data collection temperature                                     | 100 K                                                 |                                                                                       |
| Theta range for 16248 reflections used in lattice determination | 2.31 to 28.15°                                        |                                                                                       |
| Unit cell dimensions                                            | a = 10.950(2) Å<br>b = 11.718(2) Å<br>c = 13.432(3) Å | $\alpha = 68.000(3)^\circ$<br>$\beta = 76.424(4)^\circ$<br>$\gamma = 78.528(3)^\circ$ |
| Volume                                                          | 1541.5(5) Å <sup>3</sup>                              |                                                                                       |
| Z                                                               | 1                                                     |                                                                                       |
| Crystal system                                                  | triclinic                                             |                                                                                       |
| Space group                                                     | P-1 (# 2)                                             |                                                                                       |
| Density (calculated)                                            | 1.232 g/cm <sup>3</sup>                               |                                                                                       |
| F(000)                                                          | 614                                                   |                                                                                       |
| Theta range for data collection                                 | 1.9 to 28.3°                                          |                                                                                       |
| Completeness to theta = 28.34°                                  | 91.6%                                                 |                                                                                       |
| Index ranges                                                    | -14 ≤ h ≤ 14, -15 ≤ k ≤ 15, -17 ≤ l ≤ 17              |                                                                                       |
| Data collection scan type                                       | $\omega$ scans                                        |                                                                                       |
| Reflections collected                                           | 25889                                                 |                                                                                       |
| Independent reflections                                         | 7059 [ $R_{\text{int}} = 0.0499$ ]                    |                                                                                       |
| Reflections > 2 $\sigma$ (I)                                    | 5553                                                  |                                                                                       |
| Average $\sigma$ (I)/(net I)                                    | 0.0403                                                |                                                                                       |
| Absorption coefficient                                          | 0.69 mm <sup>-1</sup>                                 |                                                                                       |
| Absorption correction                                           | none                                                  |                                                                                       |
| Reflections monitored for decay                                 | initial data recollected at end                       |                                                                                       |
| Decay of standards                                              | 0%                                                    |                                                                                       |

**Table 5 (cont.)****Structure Solution and Refinement**

|                                                        |                                                                              |
|--------------------------------------------------------|------------------------------------------------------------------------------|
| Primary solution method                                | direct methods                                                               |
| Secondary solution method                              | difference map                                                               |
| Hydrogen placement                                     | calculated                                                                   |
| Refinement method                                      | Full-matrix least-squares on $F^2$                                           |
| Data / restraints / parameters                         | 7059 / 0 / 378                                                               |
| Treatment of hydrogen atoms                            | not refined, $U_{\text{iso}}$ fixed at 120% $U_{\text{eq}}$ of attached atom |
| Goodness-of-fit on $F^2$                               | 1.83                                                                         |
| Final R indices [ $I > 2\sigma(I)$ , 5553 reflections] | $R1 = 0.0356$ , $wR2 = 0.0674$                                               |
| R indices (all data)                                   | $R1 = 0.0502$ , $wR2 = 0.0692$                                               |
| Type of weighting scheme used                          | sigma                                                                        |
| Weighting scheme used                                  | calc $w=1/[\sigma^2(F_o^2)]$ where $P=(F_o^2+2F_c^2)/3$                      |
| Max shift/error                                        | 0.001                                                                        |
| Average shift/error                                    | 0.000                                                                        |
| Largest diff. peak and hole                            | 0.78 and $-0.45 \text{ e} \cdot \text{\AA}^{-3}$                             |

**Programs Used**

|                      |                     |
|----------------------|---------------------|
| Cell refinement      | Bruker SMART 5.606  |
| Data collection      | Bruker SMART 5.054  |
| Data reduction       | Bruker SAINT 6.45   |
| Structure solution   | Bruker SHELXTL 6.14 |
| Structure refinement | Bruker SHELXTL 6.14 |

**Special Refinement Details**

The chloride was disordered in two positions and was refined as such (population 51.9 and 48.1%). One  $\text{P}^i\text{Pr}_2$  unit in the ligand was also disordered and was refined in two positions (population 50.9, 49.1 %). One bad reflection (001) was omitted.

Refinement of  $F^2$  against ALL reflections. The weighted R-factor ( $wR$ ) and goodness of fit ( $S$ ) are based on  $F^2$ , conventional R-factors ( $R$ ) are based on  $F$ , with  $F$  set to zero for negative  $F^2$ . The threshold expression of  $F^2 > 2\sigma(F^2)$  is used only for calculating R-factors(gt) etc. and is not relevant to the choice of reflections for refinement. R-factors based on  $F^2$  are statistically about twice as large as those based on  $F$ , and R-factors based on ALL data will be even larger.

All esds (except the esd in the dihedral angle between two l.s. planes) are estimated using the full covariance matrix. The cell esds are taken into account individually in the estimation of esds in distances, angles and torsion angles; correlations between esds in cell parameters are only used when they are defined by crystal symmetry. An approximate (isotropic) treatment of cell esds is used for estimating esds involving l.s. planes.

**Table 6. Atomic coordinates ( $\times 10^4$ ) and equivalent isotropic displacement parameters ( $\text{\AA}^2 \times 10^3$ ) for  $[\{\text{PhBP}^{i\text{Pr}}_3\}\text{Mn}(\mu\text{-Cl})_2]$  (**1b**).  $U(\text{eq})$  is defined as one third of the trace of the orthogonalized  $U_{ij}$  tensor.**

|        | x          | y          | z          | $U_{\text{eq}}$ |
|--------|------------|------------|------------|-----------------|
| Mn     | 4333.2(2)  | 1404.6(2)  | 3952.1(2)  | 22.7(1)         |
| P(1)   | 5228.7(4)  | 3498.1(4)  | 2740.8(4)  | 21.5(1)         |
| P(2)   | 3339.0(4)  | 1633.7(4)  | 2288.1(4)  | 21.3(1)         |
| P(3A)  | 2426(3)    | 2693(3)    | 4690(3)    | 16.4(5)         |
| P(3B)  | 2183(3)    | 2466(3)    | 4655(3)    | 14.3(5)         |
| B      | 2557.1(17) | 4260.4(18) | 2287.4(16) | 17.7(4)         |
| Cl(1)  | 3826.1(8)  | -718.5(7)  | 5027.4(7)  | 21.3(3)         |
| Cl(2)  | 5279.7(8)  | 919.7(8)   | 5578.2(7)  | 20.2(3)         |
| C(1)   | 1700.4(14) | 5538.7(15) | 1650.1(12) | 14.7(3)         |
| C(2)   | 1954.9(15) | 6714.6(15) | 1529.1(14) | 21.1(4)         |
| C(3)   | 1217.5(16) | 7807.0(16) | 1049.7(15) | 25.8(4)         |
| C(4)   | 163.2(16)  | 7775.9(16) | 667.8(15)  | 26.0(4)         |
| C(5)   | -134.2(16) | 6634.0(16) | 777.0(14)  | 24.4(4)         |
| C(6)   | 611.9(15)  | 5550.8(16) | 1261.0(13) | 18.9(4)         |
| C(7)   | 4078.7(14) | 4479.8(15) | 1873.6(13) | 17.8(4)         |
| C(8)   | 2273.7(14) | 3092.3(15) | 1987.9(14) | 19.1(4)         |
| C(9)   | 2059.1(17) | 4094.4(16) | 3608.2(14) | 27.1(4)         |
| C(10)  | 6581.2(16) | 3906.4(18) | 4104.9(15) | 32.0(5)         |
| C(11)  | 5353.2(17) | 4357.5(18) | 3631.4(15) | 29.3(5)         |
| C(12)  | 5145.8(19) | 5773.4(19) | 3156.1(17) | 41.5(6)         |
| C(13)  | 7803.8(17) | 2497.0(18) | 2226.4(16) | 34.0(5)         |
| C(14)  | 6742.4(15) | 3491.9(17) | 1760.4(14) | 23.5(4)         |
| C(15)  | 7211.0(16) | 4757.9(17) | 1155.3(15) | 30.1(5)         |
| C(16)  | 5738.3(16) | 891.1(17)  | 1233.4(15) | 30.2(5)         |
| C(17)  | 4535.8(15) | 1806.2(16) | 1017.5(13) | 20.8(4)         |
| C(18)  | 4080.7(17) | 1798.5(17) | 29.0(14)   | 25.6(4)         |
| C(20)  | 2359.1(18) | 412.8(16)  | 2469.3(15) | 31.3(5)         |
| C(19)  | 3146(2)    | -829.8(17) | 2479.3(16) | 39.9(5)         |
| C(21)  | 1397.8(17) | 787.0(18)  | 1707.3(18) | 41.1(6)         |
| C(27)  | 1159.0(17) | 3789.5(17) | 6233.9(15) | 29.2(4)         |
| C(22A) | 898(3)     | 858(3)     | 6075(3)    | 26.7(10)        |
| C(23A) | 1026(8)    | 1892(7)    | 4945(6)    | 15.9(13)        |
| C(24A) | -243(4)    | 2700(4)    | 4791(4)    | 25.2(11)        |
| C(25A) | 2950(3)    | 2003(3)    | 6834(3)    | 24.7(9)         |
| C(26A) | 2448(5)    | 3080(5)    | 5898(5)    | 14.0(10)        |
| C(22B) | 993(3)     | 295(3)     | 5429(3)    | 23.2(10)        |
| C(23B) | 788(8)     | 1690(7)    | 4795(7)    | 15.8(13)        |
| C(24B) | -512(4)    | 2274(5)    | 5251(4)    | 25.6(12)        |
| C(25B) | 2078(4)    | 1568(3)    | 6951(3)    | 25.4(10)        |
| C(26B) | 2106(5)    | 2763(6)    | 5929(5)    | 19.3(12)        |

**Table 7. Bond lengths [Å] and angles [°] for {[PhBP<sup>i</sup>Pr<sub>3</sub>]Mn( $\mu$ -Cl)}<sub>2</sub> (1b).**

|               |            |               |           |
|---------------|------------|---------------|-----------|
| Mn-Cl(1)      | 2.4625(9)  | C(12)-H(12A)  | 0.9800    |
| Mn-Cl(2)      | 2.4630(9)  | C(12)-H(12B)  | 0.9800    |
| Mn-Cl(2)#1    | 2.5247(10) | C(12)-H(12C)  | 0.9800    |
| Mn-Cl(1)#1    | 2.5327(9)  | C(13)-C(14)   | 1.535(2)  |
| Mn-P(3A)      | 2.552(4)   | C(13)-H(13A)  | 0.9800    |
| Mn-P(3B)      | 2.580(4)   | C(13)-H(13B)  | 0.9800    |
| Mn-P(2)       | 2.6132(7)  | C(13)-H(13C)  | 0.9800    |
| Mn-P(1)       | 2.6162(7)  | C(14)-C(15)   | 1.526(2)  |
| P(1)-C(7)     | 1.8369(16) | C(14)-H(14)   | 1.0000    |
| P(1)-C(14)    | 1.8599(17) | C(15)-H(15A)  | 0.9800    |
| P(1)-C(11)    | 1.8701(18) | C(15)-H(15B)  | 0.9800    |
| P(2)-C(8)     | 1.8320(16) | C(15)-H(15C)  | 0.9800    |
| P(2)-C(17)    | 1.8621(17) | C(16)-C(17)   | 1.534(2)  |
| P(2)-C(20)    | 1.8666(18) | C(16)-H(16A)  | 0.9800    |
| P(3A)-C(9)    | 1.787(4)   | C(16)-H(16B)  | 0.9800    |
| P(3A)-C(26A)  | 1.848(6)   | C(16)-H(16C)  | 0.9800    |
| P(3A)-C(23A)  | 1.853(7)   | C(17)-C(18)   | 1.527(2)  |
| P(3B)-C(26B)  | 1.850(7)   | C(17)-H(17)   | 1.0000    |
| P(3B)-C(23B)  | 1.866(7)   | C(18)-H(18A)  | 0.9800    |
| P(3B)-C(9)    | 1.901(4)   | C(18)-H(18B)  | 0.9800    |
| B-C(1)        | 1.647(2)   | C(18)-H(18C)  | 0.9800    |
| B-C(8)        | 1.665(2)   | C(20)-C(21)   | 1.528(3)  |
| B-C(7)        | 1.667(2)   | C(20)-C(19)   | 1.534(2)  |
| B-C(9)        | 1.677(3)   | C(20)-H(20)   | 1.0196    |
| Cl(1)-Cl(2)#1 | 1.1637(12) | C(19)-H(19A)  | 0.9800    |
| Cl(1)-Mn#1    | 2.5327(9)  | C(19)-H(19B)  | 0.9800    |
| Cl(2)-Cl(1)#1 | 1.1637(12) | C(19)-H(19C)  | 0.9800    |
| Cl(2)-Mn#1    | 2.5247(10) | C(21)-H(21A)  | 0.9800    |
| C(1)-C(2)     | 1.402(2)   | C(21)-H(21B)  | 0.9800    |
| C(1)-C(6)     | 1.405(2)   | C(21)-H(21C)  | 0.9800    |
| C(2)-C(3)     | 1.386(2)   | C(27)-C(26B)  | 1.537(7)  |
| C(2)-H(2)     | 0.9500     | C(27)-C(26A)  | 1.550(6)  |
| C(3)-C(4)     | 1.381(2)   | C(27)-H(27A)  | 0.9461    |
| C(3)-H(3)     | 0.9500     | C(27)-H(27B)  | 0.9422    |
| C(4)-C(5)     | 1.386(2)   | C(27)-H(27C)  | 1.0027    |
| C(4)-H(4)     | 0.9500     | C(22A)-C(23A) | 1.543(9)  |
| C(5)-C(6)     | 1.386(2)   | C(22A)-H(22A) | 0.9800    |
| C(5)-H(5)     | 0.9500     | C(22A)-H(22B) | 0.9800    |
| C(6)-H(6)     | 0.9500     | C(22A)-H(22C) | 0.9800    |
| C(7)-H(7A)    | 0.9900     | C(23A)-C(24A) | 1.527(10) |
| C(7)-H(7B)    | 0.9900     | C(23A)-H(23A) | 1.0000    |
| C(8)-H(8A)    | 0.9900     | C(24A)-H(24A) | 0.9800    |
| C(8)-H(8B)    | 0.9900     | C(24A)-H(24B) | 0.9800    |
| C(9)-H(9A)    | 0.9959     | C(24A)-H(24C) | 0.9800    |
| C(9)-H(9B)    | 0.9988     | C(25A)-C(26A) | 1.528(7)  |
| C(10)-C(11)   | 1.536(2)   | C(25A)-H(25A) | 0.9800    |
| C(10)-H(10A)  | 0.9800     | C(25A)-H(25B) | 0.9800    |
| C(10)-H(10B)  | 0.9800     | C(25A)-H(25C) | 0.9800    |
| C(10)-H(10C)  | 0.9800     | C(26A)-H(26A) | 1.0000    |
| C(11)-C(12)   | 1.528(3)   | C(22B)-C(23B) | 1.533(9)  |
| C(11)-H(11)   | 1.0000     | C(22B)-H(22D) | 0.9800    |



|                    |            |                     |            |
|--------------------|------------|---------------------|------------|
| C(22B)-H(22E)      | 0.9800     | C(9)-P(3A)-C(23A)   | 101.1(3)   |
| C(22B)-H(22F)      | 0.9800     | C(26A)-P(3A)-C(23A) | 109.5(4)   |
| C(23B)-C(24B)      | 1.544(11)  | C(9)-P(3A)-Mn       | 108.98(18) |
| C(23B)-H(23B)      | 1.0000     | C(26A)-P(3A)-Mn     | 120.0(2)   |
| C(24B)-H(24D)      | 0.9800     | C(23A)-P(3A)-Mn     | 106.9(3)   |
| C(24B)-H(24E)      | 0.9800     | C(26B)-P(3B)-C(23B) | 109.1(4)   |
| C(24B)-H(24F)      | 0.9800     | C(26B)-P(3B)-C(9)   | 102.5(2)   |
| C(25B)-C(26B)      | 1.550(7)   | C(23B)-P(3B)-C(9)   | 110.4(3)   |
| C(25B)-H(25D)      | 0.9800     | C(26B)-P(3B)-Mn     | 115.0(2)   |
| C(25B)-H(25E)      | 0.9800     | C(23B)-P(3B)-Mn     | 114.8(3)   |
| C(25B)-H(25F)      | 0.9800     | C(9)-P(3B)-Mn       | 104.21(16) |
| C(26B)-H(26B)      | 1.0000     | C(1)-B-C(8)         | 108.88(13) |
|                    |            | C(1)-B-C(7)         | 108.26(13) |
| Cl(1)-Mn-Cl(2)     | 77.95(3)   | C(8)-B-C(7)         | 110.79(13) |
| Cl(1)-Mn-Cl(2)#1   | 26.95(3)   | C(1)-B-C(9)         | 103.57(13) |
| Cl(2)-Mn-Cl(2)#1   | 82.95(3)   | C(8)-B-C(9)         | 112.67(14) |
| Cl(1)-Mn-Cl(1)#1   | 83.15(3)   | C(7)-B-C(9)         | 112.29(13) |
| Cl(2)-Mn-Cl(1)#1   | 26.89(3)   | Cl(2)#1-Cl(1)-Mn    | 79.50(6)   |
| Cl(2)#1-Mn-Cl(1)#1 | 75.55(3)   | Cl(2)#1-Cl(1)-Mn#1  | 73.21(6)   |
| Cl(1)-Mn-P(3A)     | 101.39(8)  | Mn-Cl(1)-Mn#1       | 96.85(3)   |
| Cl(2)-Mn-P(3A)     | 91.05(8)   | Cl(1)#1-Cl(2)-Mn    | 79.89(6)   |
| Cl(2)#1-Mn-P(3A)   | 128.11(7)  | Cl(1)#1-Cl(2)-Mn#1  | 73.55(6)   |
| Cl(1)#1-Mn-P(3A)   | 116.17(8)  | Mn-Cl(2)-Mn#1       | 97.05(3)   |
| Cl(1)-Mn-P(3B)     | 94.72(8)   | C(2)-C(1)-C(6)      | 114.37(15) |
| Cl(2)-Mn-P(3B)     | 96.53(8)   | C(2)-C(1)-B         | 121.71(13) |
| Cl(2)#1-Mn-P(3B)   | 120.78(7)  | C(6)-C(1)-B         | 123.74(14) |
| Cl(1)#1-Mn-P(3B)   | 122.74(8)  | C(3)-C(2)-C(1)      | 123.46(15) |
| P(3A)-Mn-P(3B)     | 9.65(7)    | C(3)-C(2)-H(2)      | 118.3      |
| Cl(1)-Mn-P(2)      | 95.64(2)   | C(1)-C(2)-H(2)      | 118.3      |
| Cl(2)-Mn-P(2)      | 173.17(2)  | C(4)-C(3)-C(2)      | 120.20(16) |
| Cl(2)#1-Mn-P(2)    | 90.26(2)   | C(4)-C(3)-H(3)      | 119.9      |
| Cl(1)#1-Mn-P(2)    | 151.00(3)  | C(2)-C(3)-H(3)      | 119.9      |
| P(3A)-Mn-P(2)      | 92.55(8)   | C(3)-C(4)-C(5)      | 118.51(16) |
| P(3B)-Mn-P(2)      | 86.26(7)   | C(3)-C(4)-H(4)      | 120.7      |
| Cl(1)-Mn-P(1)      | 171.13(2)  | C(5)-C(4)-H(4)      | 120.7      |
| Cl(2)-Mn-P(1)      | 99.61(3)   | C(6)-C(5)-C(4)      | 120.52(15) |
| Cl(2)#1-Mn-P(1)    | 144.74(3)  | C(6)-C(5)-H(5)      | 119.7      |
| Cl(1)#1-Mn-P(1)    | 90.90(2)   | C(4)-C(5)-H(5)      | 119.7      |
| P(3A)-Mn-P(1)      | 87.13(7)   | C(5)-C(6)-C(1)      | 122.93(15) |
| P(3B)-Mn-P(1)      | 94.03(7)   | C(5)-C(6)-H(6)      | 118.5      |
| P(2)-Mn-P(1)       | 86.375(18) | C(1)-C(6)-H(6)      | 118.5      |
| C(7)-P(1)-C(14)    | 103.70(8)  | B-C(7)-P(1)         | 118.92(11) |
| C(7)-P(1)-C(11)    | 105.92(8)  | B-C(7)-H(7A)        | 107.6      |
| C(14)-P(1)-C(11)   | 108.46(8)  | P(1)-C(7)-H(7A)     | 107.6      |
| C(7)-P(1)-Mn       | 108.61(6)  | B-C(7)-H(7B)        | 107.6      |
| C(14)-P(1)-Mn      | 119.76(6)  | P(1)-C(7)-H(7B)     | 107.6      |
| C(11)-P(1)-Mn      | 109.46(7)  | H(7A)-C(7)-H(7B)    | 107.0      |
| C(8)-P(2)-C(17)    | 104.89(8)  | B-C(8)-P(2)         | 119.77(11) |
| C(8)-P(2)-C(20)    | 105.56(8)  | B-C(8)-H(8A)        | 107.4      |
| C(17)-P(2)-C(20)   | 108.26(8)  | P(2)-C(8)-H(8A)     | 107.4      |
| C(8)-P(2)-Mn       | 107.52(6)  | B-C(8)-H(8B)        | 107.4      |
| C(17)-P(2)-Mn      | 112.67(6)  | P(2)-C(8)-H(8B)     | 107.4      |
| C(20)-P(2)-Mn      | 117.01(7)  | H(8A)-C(8)-H(8B)    | 106.9      |
| C(9)-P(3A)-C(26A)  | 108.7(2)   | B-C(9)-P(3A)        | 122.81(17) |

|                     |            |                      |            |
|---------------------|------------|----------------------|------------|
| B-C(9)-P(3B)        | 118.06(16) | C(18)-C(17)-H(17)    | 105.4      |
| P(3A)-C(9)-P(3B)    | 13.01(12)  | C(16)-C(17)-H(17)    | 105.4      |
| B-C(9)-H(9A)        | 107.0      | P(2)-C(17)-H(17)     | 105.4      |
| P(3A)-C(9)-H(9A)    | 111.6      | C(17)-C(18)-H(18A)   | 109.5      |
| P(3B)-C(9)-H(9A)    | 104.1      | C(17)-C(18)-H(18B)   | 109.5      |
| B-C(9)-H(9B)        | 106.9      | H(18A)-C(18)-H(18B)  | 109.5      |
| P(3A)-C(9)-H(9B)    | 101.3      | C(17)-C(18)-H(18C)   | 109.5      |
| P(3B)-C(9)-H(9B)    | 114.1      | H(18A)-C(18)-H(18C)  | 109.5      |
| H(9A)-C(9)-H(9B)    | 105.8      | H(18B)-C(18)-H(18C)  | 109.5      |
| C(11)-C(10)-H(10A)  | 109.5      | C(21)-C(20)-C(19)    | 110.70(16) |
| C(11)-C(10)-H(10B)  | 109.5      | C(21)-C(20)-P(2)     | 115.89(13) |
| H(10A)-C(10)-H(10B) | 109.5      | C(19)-C(20)-P(2)     | 113.31(14) |
| C(11)-C(10)-H(10C)  | 109.5      | C(21)-C(20)-H(20)    | 106.1      |
| H(10A)-C(10)-H(10C) | 109.5      | C(19)-C(20)-H(20)    | 102.7      |
| H(10B)-C(10)-H(10C) | 109.5      | P(2)-C(20)-H(20)     | 106.9      |
| C(12)-C(11)-C(10)   | 110.83(16) | C(20)-C(19)-H(19A)   | 109.5      |
| C(12)-C(11)-P(1)    | 116.92(13) | C(20)-C(19)-H(19B)   | 109.5      |
| C(10)-C(11)-P(1)    | 111.82(12) | H(19A)-C(19)-H(19B)  | 109.5      |
| C(12)-C(11)-H(11)   | 105.4      | C(20)-C(19)-H(19C)   | 109.5      |
| C(10)-C(11)-H(11)   | 105.4      | H(19A)-C(19)-H(19C)  | 109.5      |
| P(1)-C(11)-H(11)    | 105.4      | H(19B)-C(19)-H(19C)  | 109.5      |
| C(11)-C(12)-H(12A)  | 109.5      | C(20)-C(21)-H(21A)   | 109.5      |
| C(11)-C(12)-H(12B)  | 109.5      | C(20)-C(21)-H(21B)   | 109.5      |
| H(12A)-C(12)-H(12B) | 109.5      | H(21A)-C(21)-H(21B)  | 109.5      |
| C(11)-C(12)-H(12C)  | 109.5      | C(20)-C(21)-H(21C)   | 109.5      |
| H(12A)-C(12)-H(12C) | 109.5      | H(21A)-C(21)-H(21C)  | 109.5      |
| H(12B)-C(12)-H(12C) | 109.5      | H(21B)-C(21)-H(21C)  | 109.5      |
| C(14)-C(13)-H(13A)  | 109.5      | C(26B)-C(27)-C(26A)  | 21.02(16)  |
| C(14)-C(13)-H(13B)  | 109.5      | C(26B)-C(27)-H(27A)  | 87.0       |
| H(13A)-C(13)-H(13B) | 109.5      | C(26A)-C(27)-H(27A)  | 105.6      |
| C(14)-C(13)-H(13C)  | 109.5      | C(26B)-C(27)-H(27B)  | 108.4      |
| H(13A)-C(13)-H(13C) | 109.5      | C(26A)-C(27)-H(27B)  | 107.6      |
| H(13B)-C(13)-H(13C) | 109.5      | H(27A)-C(27)-H(27B)  | 115.9      |
| C(15)-C(14)-C(13)   | 111.58(14) | C(26B)-C(27)-H(27C)  | 122.9      |
| C(15)-C(14)-P(1)    | 114.88(12) | C(26A)-C(27)-H(27C)  | 106.1      |
| C(13)-C(14)-P(1)    | 114.46(13) | H(27A)-C(27)-H(27C)  | 110.4      |
| C(15)-C(14)-H(14)   | 104.9      | H(27B)-C(27)-H(27C)  | 110.7      |
| C(13)-C(14)-H(14)   | 104.9      | C(24A)-C(23A)-C(22A) | 110.2(6)   |
| P(1)-C(14)-H(14)    | 104.9      | C(24A)-C(23A)-P(3A)  | 117.3(4)   |
| C(14)-C(15)-H(15A)  | 109.5      | C(22A)-C(23A)-P(3A)  | 110.9(4)   |
| C(14)-C(15)-H(15B)  | 109.5      | C(24A)-C(23A)-H(23A) | 105.9      |
| H(15A)-C(15)-H(15B) | 109.5      | C(22A)-C(23A)-H(23A) | 105.9      |
| C(14)-C(15)-H(15C)  | 109.5      | P(3A)-C(23A)-H(23A)  | 105.9      |
| H(15A)-C(15)-H(15C) | 109.5      | C(25A)-C(26A)-C(27)  | 114.8(4)   |
| H(15B)-C(15)-H(15C) | 109.5      | C(25A)-C(26A)-P(3A)  | 114.8(4)   |
| C(17)-C(16)-H(16A)  | 109.5      | C(27)-C(26A)-P(3A)   | 110.4(3)   |
| C(17)-C(16)-H(16B)  | 109.5      | C(25A)-C(26A)-H(26A) | 105.2      |
| H(16A)-C(16)-H(16B) | 109.5      | C(27)-C(26A)-H(26A)  | 105.2      |
| C(17)-C(16)-H(16C)  | 109.5      | P(3A)-C(26A)-H(26A)  | 105.2      |
| H(16A)-C(16)-H(16C) | 109.5      | C(23B)-C(22B)-H(22D) | 109.5      |
| H(16B)-C(16)-H(16C) | 109.5      | C(23B)-C(22B)-H(22E) | 109.5      |
| C(18)-C(17)-C(16)   | 111.00(14) | H(22D)-C(22B)-H(22E) | 109.5      |
| C(18)-C(17)-P(2)    | 116.86(11) | C(23B)-C(22B)-H(22F) | 109.5      |
| C(16)-C(17)-P(2)    | 111.71(12) | H(22D)-C(22B)-H(22F) | 109.5      |

|                      |          |                      |          |
|----------------------|----------|----------------------|----------|
| H(22E)-C(22B)-H(22F) | 109.5    | C(26B)-C(25B)-H(25D) | 109.5    |
| C(22B)-C(23B)-C(24B) | 110.6(6) | C(26B)-C(25B)-H(25E) | 109.5    |
| C(22B)-C(23B)-P(3B)  | 111.7(5) | H(25D)-C(25B)-H(25E) | 109.5    |
| C(24B)-C(23B)-P(3B)  | 116.3(4) | C(26B)-C(25B)-H(25F) | 109.5    |
| C(22B)-C(23B)-H(23B) | 105.8    | H(25D)-C(25B)-H(25F) | 109.5    |
| C(24B)-C(23B)-H(23B) | 105.8    | H(25E)-C(25B)-H(25F) | 109.5    |
| P(3B)-C(23B)-H(23B)  | 105.8    | C(27)-C(26B)-C(25B)  | 108.2(4) |
| C(23B)-C(24B)-H(24D) | 109.5    | C(27)-C(26B)-P(3B)   | 122.2(4) |
| C(23B)-C(24B)-H(24E) | 109.5    | C(25B)-C(26B)-P(3B)  | 113.1(4) |
| H(24D)-C(24B)-H(24E) | 109.5    | C(27)-C(26B)-H(26B)  | 103.7    |
| C(23B)-C(24B)-H(24F) | 109.5    | C(25B)-C(26B)-H(26B) | 103.7    |
| H(24D)-C(24B)-H(24F) | 109.5    | P(3B)-C(26B)-H(26B)  | 103.7    |
| H(24E)-C(24B)-H(24F) | 109.5    |                      |          |

---

Symmetry transformations used to generate equivalent atoms:

#1 -x+1,-y,-z+1

**Table 8. Anisotropic displacement parameters ( $\text{\AA}^2 \times 10^4$ ) for  $\{[\text{PhBP}^{\text{iPr}}_3]\text{Mn}(\mu\text{-Cl})_2\}_2$  (**1b**). The anisotropic displacement factor exponent takes the form:  $-2\pi^2[\text{h}^2\text{a}^*2\text{U}^{11} + \dots + 2\text{h k a}^* \text{b}^* \text{U}^{12}]$**

|        | $U^{11}$ | $U^{22}$ | $U^{33}$ | $U^{23}$ | $U^{13}$ | $U^{12}$ |
|--------|----------|----------|----------|----------|----------|----------|
| Mn     | 263(2)   | 205(2)   | 135(2)   | -33(1)   | -22(1)   | 79(1)    |
| P(1)   | 187(2)   | 282(3)   | 186(2)   | -118(2)  | -71(2)   | 70(2)    |
| P(2)   | 270(2)   | 132(2)   | 187(3)   | -55(2)   | 16(2)    | 19(2)    |
| P(3A)  | 160(12)  | 140(11)  | 178(7)   | -56(7)   | -9(7)    | -9(7)    |
| P(3B)  | 169(13)  | 131(12)  | 116(6)   | -52(7)   | -22(7)   | 23(7)    |
| B      | 183(10)  | 148(10)  | 187(11)  | -54(9)   | -52(8)   | 26(8)    |
| Cl(1)  | 205(5)   | 157(4)   | 255(5)   | -15(4)   | -86(4)   | -29(3)   |
| Cl(2)  | 270(6)   | 154(5)   | 214(5)   | -72(4)   | -125(4)  | 17(4)    |
| C(1)   | 148(8)   | 154(9)   | 119(8)   | -53(7)   | 8(6)     | -2(7)    |
| C(2)   | 181(9)   | 200(10)  | 282(10)  | -102(8)  | -86(8)   | 0(7)     |
| C(3)   | 283(10)  | 153(10)  | 338(11)  | -100(9)  | -40(8)   | -11(8)   |
| C(4)   | 238(10)  | 183(10)  | 301(11)  | -53(9)   | -87(8)   | 88(8)    |
| C(5)   | 179(9)   | 282(11)  | 285(11)  | -106(9)  | -97(8)   | 22(8)    |
| C(6)   | 184(9)   | 167(9)   | 221(10)  | -77(8)   | -16(7)   | -31(7)   |
| C(7)   | 207(9)   | 181(9)   | 160(9)   | -85(8)   | -69(7)   | 41(7)    |
| C(8)   | 162(8)   | 137(9)   | 239(10)  | -66(8)   | 14(7)    | 9(7)     |
| C(9)   | 285(10)  | 227(10)  | 197(10)  | -42(8)   | -30(8)   | 121(8)   |
| C(10)  | 292(10)  | 436(13)  | 305(11)  | -214(10) | -146(9)  | 76(9)    |
| C(11)  | 235(10)  | 465(13)  | 258(11)  | -248(10) | -105(8)  | 103(9)   |
| C(12)  | 425(12)  | 504(14)  | 482(14)  | -372(12) | -279(11) | 215(11)  |
| C(13)  | 236(10)  | 410(13)  | 385(12)  | -210(10) | -83(9)   | 117(9)   |
| C(14)  | 179(9)   | 322(11)  | 225(10)  | -155(9)  | -48(7)   | 61(8)    |
| C(15)  | 227(10)  | 364(12)  | 318(11)  | -168(10) | -12(8)   | 9(9)     |
| C(16)  | 281(10)  | 310(12)  | 311(11)  | -172(10) | -29(9)   | 77(9)    |
| C(17)  | 234(9)   | 172(9)   | 181(9)   | -61(8)   | 8(7)     | 5(7)     |
| C(18)  | 295(10)  | 233(10)  | 217(10)  | -81(8)   | -16(8)   | -8(8)    |
| C(20)  | 405(11)  | 154(10)  | 303(11)  | -92(9)   | 148(9)   | -83(9)   |
| C(19)  | 683(15)  | 146(10)  | 299(12)  | -82(9)   | 20(11)   | -13(10)  |
| C(21)  | 251(10)  | 258(12)  | 763(17)  | -279(12) | 48(11)   | -75(9)   |
| C(27)  | 301(10)  | 216(11)  | 306(11)  | -110(9)  | 67(8)    | -21(8)   |
| C(22A) | 220(19)  | 260(20)  | 270(20)  | -34(18)  | -1(16)   | -81(17)  |
| C(23A) | 180(30)  | 100(30)  | 220(30)  | -73(19)  | -30(20)  | -30(20)  |
| C(24A) | 150(20)  | 280(30)  | 350(30)  | -120(20) | 0(20)    | -89(19)  |
| C(25A) | 230(20)  | 280(20)  | 220(20)  | -81(17)  | -43(16)  | -12(17)  |
| C(26A) | 130(30)  | 180(30)  | 140(20)  | -80(20)  | -34(18)  | -20(18)  |
| C(22B) | 219(19)  | 190(20)  | 280(20)  | -72(17)  | -30(16)  | -48(16)  |
| C(23B) | 170(30)  | 150(30)  | 180(30)  | -60(20)  | -30(20)  | -80(20)  |
| C(24B) | 120(20)  | 230(30)  | 370(30)  | -60(20)  | -10(20)  | -35(19)  |
| C(25B) | 290(20)  | 270(20)  | 170(20)  | -80(17)  | -16(16)  | 14(18)   |
| C(26B) | 120(30)  | 250(30)  | 250(20)  | -100(20) | -30(20)  | -76(19)  |

**Table 9. Crystal Data and Structure Analysis Details for [PhBP<sup>i</sup>Pr<sub>3</sub>]MnI (2).**

|                         |                                                    |
|-------------------------|----------------------------------------------------|
| Empirical formula       | C <sub>33</sub> H <sub>59</sub> BIMnP <sub>3</sub> |
| Formula weight          | 741.36                                             |
| Crystallization solvent | benzene/petroleum ether                            |
| Crystal shape           | plate                                              |
| Crystal color           | colorless                                          |
| Crystal size            | 0.20 x 0.22 x 0.30 mm                              |

### Data Collection

|                                                                 |                                                       |                                                                        |
|-----------------------------------------------------------------|-------------------------------------------------------|------------------------------------------------------------------------|
| Preliminary photograph(s)                                       | rotation                                              |                                                                        |
| Type of diffractometer                                          | Bruker SMART 1000                                     |                                                                        |
| Wavelength                                                      | 0.71073 Å MoK $\alpha$                                |                                                                        |
| Data collection temperature                                     | 100 K                                                 |                                                                        |
| Theta range for 21436 reflections used in lattice determination | 2.152 to 28.255°                                      |                                                                        |
| Unit cell dimensions                                            | a = 9.5424(8) Å<br>b = 9.9006(8) Å<br>c = 19.668(2) Å | $\alpha$ = 89.780(1)°<br>$\beta$ = 89.920(1)°<br>$\gamma$ = 82.662(1)° |
| Volume                                                          | 1842.9(3) Å <sup>3</sup>                              |                                                                        |
| Z                                                               | 2                                                     |                                                                        |
| Crystal system                                                  | triclinic                                             |                                                                        |
| Space group                                                     | P-1 (# 2)                                             |                                                                        |
| Density (calculated)                                            | 1.336 g/cm <sup>3</sup>                               |                                                                        |
| F(000)                                                          | 770                                                   |                                                                        |
| Theta range for data collection                                 | 2.1 to 28.5°                                          |                                                                        |
| Completeness to theta = 28.46°                                  | 90.9%                                                 |                                                                        |
| Index ranges                                                    | -12 ≤ h ≤ 12, -13 ≤ k ≤ 13, -25 ≤ l ≤ 25              |                                                                        |
| Data collection scan type                                       | $\omega$ scans                                        |                                                                        |
| Reflections collected                                           | 33155                                                 |                                                                        |
| Independent reflections                                         | 8473 [R <sub>int</sub> = 0.0674]                      |                                                                        |
| Reflections > 2 $\sigma$ (I)                                    | 6869                                                  |                                                                        |
| Average $\sigma$ (I)/(net I)                                    | 0.0494                                                |                                                                        |
| Absorption coefficient                                          | 1.35 mm <sup>-1</sup>                                 |                                                                        |
| Absorption correction                                           | none                                                  |                                                                        |
| Reflections monitored for decay                                 | initial data recollected at end                       |                                                                        |
| Decay of standards                                              | 0%                                                    |                                                                        |

**Table 9 (cont.)****Structure Solution and Refinement**

|                                                        |                                                                              |
|--------------------------------------------------------|------------------------------------------------------------------------------|
| Primary solution method                                | direct methods                                                               |
| Secondary solution method                              | difference map                                                               |
| Hydrogen placement                                     | calculated                                                                   |
| Refinement method                                      | Full-matrix least-squares on $F^2$                                           |
| Data / restraints / parameters                         | 8473 / 0 / 364                                                               |
| Treatment of hydrogen atoms                            | not refined, $U_{\text{iso}}$ fixed at 120% $U_{\text{eq}}$ of attached atom |
| Goodness-of-fit on $F^2$                               | 1.33                                                                         |
| Final R indices [ $I > 2\sigma(I)$ , 6869 reflections] | $R1 = 0.0305$ , $wR2 = 0.0586$                                               |
| R indices (all data)                                   | $R1 = 0.0417$ , $wR2 = 0.0602$                                               |
| Type of weighting scheme used                          | sigma                                                                        |
| Weighting scheme used                                  | calc $w=1/[\sigma^2(F_o^2)]$ where $P=(F_o^2+2F_c^2)/3$                      |
| Max shift/error                                        | 0.002                                                                        |
| Average shift/error                                    | 0.000                                                                        |
| Largest diff. peak and hole                            | 0.94 and -0.61 $e \cdot \text{\AA}^{-3}$                                     |

**Programs Used**

|                      |                     |
|----------------------|---------------------|
| Cell refinement      | Bruker SMART 5.606  |
| Data collection      | Bruker SMART 5.054  |
| Data reduction       | Bruker SAINT 6.45   |
| Structure solution   | Bruker SHELXTL 6.14 |
| Structure refinement | Bruker SHELXTL 6.14 |

**Special Refinement Details**

One benzene solvent molecule was present in the asymmetric unit.

Refinement of  $F^2$  against ALL reflections. The weighted R-factor ( $wR$ ) and goodness of fit ( $S$ ) are based on  $F^2$ , conventional R-factors ( $R$ ) are based on  $F$ , with  $F$  set to zero for negative  $F^2$ . The threshold expression of  $F^2 > 2\sigma(F^2)$  is used only for calculating R-factors(gt) etc. and is not relevant to the choice of reflections for refinement. R-factors based on  $F^2$  are statistically about twice as large as those based on  $F$ , and R-factors based on ALL data will be even larger.

All esds (except the esd in the dihedral angle between two l.s. planes) are estimated using the full covariance matrix. The cell esds are taken into account individually in the estimation of esds in distances, angles and torsion angles; correlations between esds in cell parameters are only used when they are defined by crystal symmetry. An approximate (isotropic) treatment of cell esds is used for estimating esds involving l.s. planes.

**Table 10. Atomic coordinates ( $\times 10^4$ ) and equivalent isotropic displacement parameters ( $\text{\AA}^2 \times 10^3$ ) for  $[\text{PhBP}^{i\text{Pr}}_3]\text{MnI}$  (2).  $U(\text{eq})$  is defined as one third of the trace of the orthogonalized  $U^{ij}$  tensor.**

|       | x          | y          | z          | $U_{\text{eq}}$ |
|-------|------------|------------|------------|-----------------|
| Mn    | 144.5(3)   | -637.5(3)  | 6988.6(2)  | 13.1(1)         |
| P(1)  | -29.1(6)   | 1937.7(6)  | 7026.7(3)  | 14.6(1)         |
| P(2)  | 315.2(6)   | -794.4(6)  | 8267.6(3)  | 14.8(1)         |
| P(3)  | 2815.4(5)  | -836.7(6)  | 6892.7(3)  | 13.1(1)         |
| B     | 2372(2)    | 1250(3)    | 8014.9(12) | 13.8(5)         |
| I     | -1445.8(2) | -2108.9(2) | 6277.7(1)  | 22.7(1)         |
| C(1)  | 3416(2)    | 2047(2)    | 8499.4(10) | 14.0(5)         |
| C(2)  | 3812(2)    | 3329(2)    | 8346.5(11) | 16.3(5)         |
| C(3)  | 4690(2)    | 3980(2)    | 8766.8(12) | 21.9(5)         |
| C(4)  | 5205(2)    | 3373(3)    | 9366.3(12) | 22.6(5)         |
| C(5)  | 4868(2)    | 2091(2)    | 9526.9(12) | 22.3(5)         |
| C(6)  | 4003(2)    | 1449(2)    | 9100.2(11) | 19.3(5)         |
| C(7)  | 1537(2)    | 2372(2)    | 7474.8(10) | 14.8(5)         |
| C(8)  | 1225(2)    | 619(2)     | 8542.4(10) | 14.3(5)         |
| C(9)  | 3470(2)    | 38(2)      | 7622.1(10) | 14.1(4)         |
| C(10) | -662(3)    | 2159(3)    | 5637.8(11) | 28.7(6)         |
| C(11) | -386(2)    | 3026(2)    | 6249.2(11) | 20.4(5)         |
| C(12) | 732(3)     | 3949(3)    | 6085.9(13) | 35.8(7)         |
| C(13) | -2926(2)   | 2139(3)    | 7263.6(13) | 27.5(6)         |
| C(14) | -1567(2)   | 2549(2)    | 7572.3(11) | 18.1(5)         |
| C(15) | -1737(2)   | 4072(2)    | 7734.7(12) | 26.0(6)         |
| C(16) | -2394(2)   | -1501(3)   | 8503.2(13) | 34.2(7)         |
| C(17) | -1145(2)   | -1008(3)   | 8873.5(12) | 25.1(6)         |
| C(18) | -1626(2)   | 233(3)     | 9304.9(12) | 30.7(6)         |
| C(19) | 850(2)     | -3620(2)   | 8283.2(12) | 23.9(5)         |
| C(20) | 1571(2)    | -2366(2)   | 8412.3(11) | 21.3(5)         |
| C(21) | 2343(2)    | -2435(2)   | 9091.7(11) | 23.4(5)         |
| C(22) | 3041(2)    | -3605(2)   | 6555.2(13) | 26.0(6)         |
| C(23) | 3956(2)    | -2491(2)   | 6732.4(11) | 16.4(5)         |
| C(24) | 4987(2)    | -2957(2)   | 7304.8(12) | 25.5(6)         |
| C(25) | 2651(2)    | -494(2)    | 5493.8(11) | 19.2(5)         |
| C(26) | 3157(2)    | 178(2)     | 6129.8(10) | 15.0(5)         |
| C(27) | 4685(2)    | 473(3)     | 6051.7(12) | 25.8(6)         |
| C(28) | 4365(3)    | 3815(3)    | 4989.4(12) | 27.5(6)         |
| C(29) | 5579(3)    | 3879(3)    | 5372.7(12) | 28.9(6)         |
| C(30) | 6203(3)    | 5057(3)    | 5385.0(13) | 29.4(6)         |
| C(31) | 8588(3)    | 5347(3)    | -133.5(14) | 35.4(7)         |
| C(32) | 9272(3)    | 6139(3)    | 285.2(13)  | 35.2(7)         |
| C(33) | 10690(3)   | 5812(3)    | 421.2(13)  | 35.9(7)         |

**Table 11. Bond lengths [Å] and angles [°] for [PhBP<sup>i</sup>Pr<sub>3</sub>]MnI (2).**

|              |           |               |          |
|--------------|-----------|---------------|----------|
| Mn-P(2)      | 2.5238(7) | C(15)-H(15C)  | 0.9800   |
| Mn-P(1)      | 2.5351(7) | C(16)-C(17)   | 1.531(3) |
| Mn-P(3)      | 2.5379(6) | C(16)-H(16A)  | 0.9800   |
| Mn-I         | 2.6394(4) | C(16)-H(16B)  | 0.9800   |
| P(1)-C(7)    | 1.835(2)  | C(16)-H(16C)  | 0.9800   |
| P(1)-C(14)   | 1.856(2)  | C(17)-C(18)   | 1.518(3) |
| P(1)-C(11)   | 1.874(2)  | C(17)-H(17)   | 1.0000   |
| P(2)-C(8)    | 1.822(2)  | C(18)-H(18A)  | 0.9800   |
| P(2)-C(20)   | 1.860(2)  | C(18)-H(18B)  | 0.9800   |
| P(2)-C(17)   | 1.865(2)  | C(18)-H(18C)  | 0.9800   |
| P(3)-C(9)    | 1.830(2)  | C(19)-C(20)   | 1.517(3) |
| P(3)-C(26)   | 1.854(2)  | C(19)-H(19A)  | 0.9800   |
| P(3)-C(23)   | 1.875(2)  | C(19)-H(19B)  | 0.9800   |
| B-C(1)       | 1.653(3)  | C(19)-H(19C)  | 0.9800   |
| B-C(7)       | 1.663(3)  | C(20)-C(21)   | 1.524(3) |
| B-C(9)       | 1.679(3)  | C(20)-H(20)   | 1.0000   |
| B-C(8)       | 1.683(3)  | C(21)-H(21A)  | 0.9800   |
| C(1)-C(2)    | 1.402(3)  | C(21)-H(21B)  | 0.9800   |
| C(1)-C(6)    | 1.404(3)  | C(21)-H(21C)  | 0.9800   |
| C(2)-C(3)    | 1.394(3)  | C(22)-C(23)   | 1.533(3) |
| C(2)-H(2)    | 0.9500    | C(22)-H(22A)  | 0.9800   |
| C(3)-C(4)    | 1.383(3)  | C(22)-H(22B)  | 0.9800   |
| C(3)-H(3)    | 0.9500    | C(22)-H(22C)  | 0.9800   |
| C(4)-C(5)    | 1.384(3)  | C(23)-C(24)   | 1.527(3) |
| C(4)-H(4)    | 0.9500    | C(23)-H(23)   | 1.0000   |
| C(5)-C(6)    | 1.389(3)  | C(24)-H(24A)  | 0.9800   |
| C(5)-H(5)    | 0.9500    | C(24)-H(24B)  | 0.9800   |
| C(6)-H(6)    | 0.9500    | C(24)-H(24C)  | 0.9800   |
| C(7)-H(7A)   | 0.9900    | C(25)-C(26)   | 1.526(3) |
| C(7)-H(7B)   | 0.9900    | C(25)-H(25A)  | 0.9800   |
| C(8)-H(8A)   | 0.9900    | C(25)-H(25B)  | 0.9800   |
| C(8)-H(8B)   | 0.9900    | C(25)-H(25C)  | 0.9800   |
| C(9)-H(9A)   | 0.9900    | C(26)-C(27)   | 1.531(3) |
| C(9)-H(9B)   | 0.9900    | C(26)-H(26)   | 1.0000   |
| C(10)-C(11)  | 1.523(3)  | C(27)-H(27A)  | 0.9800   |
| C(10)-H(10A) | 0.9800    | C(27)-H(27B)  | 0.9800   |
| C(10)-H(10B) | 0.9800    | C(27)-H(27C)  | 0.9800   |
| C(10)-H(10C) | 0.9800    | C(28)-C(30)#1 | 1.387(3) |
| C(11)-C(12)  | 1.524(3)  | C(28)-C(29)   | 1.392(3) |
| C(11)-H(11)  | 1.0000    | C(28)-H(28)   | 0.9500   |
| C(12)-H(12A) | 0.9800    | C(29)-C(30)   | 1.376(3) |
| C(12)-H(12B) | 0.9800    | C(29)-H(29)   | 0.9500   |
| C(12)-H(12C) | 0.9800    | C(30)-C(28)#1 | 1.387(3) |
| C(13)-C(14)  | 1.534(3)  | C(30)-H(30)   | 0.9500   |
| C(13)-H(13A) | 0.9800    | C(31)-C(32)   | 1.363(4) |
| C(13)-H(13B) | 0.9800    | C(31)-C(33)#2 | 1.383(4) |
| C(13)-H(13C) | 0.9800    | C(31)-H(31)   | 0.9500   |
| C(14)-C(15)  | 1.531(3)  | C(32)-C(33)   | 1.377(4) |
| C(14)-H(14)  | 1.0000    | C(32)-H(32)   | 0.9500   |
| C(15)-H(15A) | 0.9800    | C(33)-C(31)#2 | 1.383(4) |
| C(15)-H(15B) | 0.9800    | C(33)-H(33)   | 0.9500   |



|                  |             |                     |            |
|------------------|-------------|---------------------|------------|
| P(2)-Mn-P(1)     | 91.39(2)    | H(7A)-C(7)-H(7B)    | 107.0      |
| P(2)-Mn-P(3)     | 90.68(2)    | B-C(8)-P(2)         | 119.80(14) |
| P(1)-Mn-P(3)     | 90.95(2)    | B-C(8)-H(8A)        | 107.4      |
| P(2)-Mn-I        | 122.273(18) | P(2)-C(8)-H(8A)     | 107.4      |
| P(1)-Mn-I        | 127.190(18) | B-C(8)-H(8B)        | 107.4      |
| P(3)-Mn-I        | 124.095(17) | P(2)-C(8)-H(8B)     | 107.4      |
| C(7)-P(1)-C(14)  | 106.16(10)  | H(8A)-C(8)-H(8B)    | 106.9      |
| C(7)-P(1)-C(11)  | 110.60(10)  | B-C(9)-P(3)         | 118.83(14) |
| C(14)-P(1)-C(11) | 101.84(10)  | B-C(9)-H(9A)        | 107.6      |
| C(7)-P(1)-Mn     | 107.53(7)   | P(3)-C(9)-H(9A)     | 107.6      |
| C(14)-P(1)-Mn    | 107.12(7)   | B-C(9)-H(9B)        | 107.6      |
| C(11)-P(1)-Mn    | 122.35(7)   | P(3)-C(9)-H(9B)     | 107.6      |
| C(8)-P(2)-C(20)  | 106.13(10)  | H(9A)-C(9)-H(9B)    | 107.0      |
| C(8)-P(2)-C(17)  | 109.38(10)  | C(11)-C(10)-H(10A)  | 109.5      |
| C(20)-P(2)-C(17) | 102.72(11)  | C(11)-C(10)-H(10B)  | 109.5      |
| C(8)-P(2)-Mn     | 106.57(7)   | H(10A)-C(10)-H(10B) | 109.5      |
| C(20)-P(2)-Mn    | 103.38(7)   | C(11)-C(10)-H(10C)  | 109.5      |
| C(17)-P(2)-Mn    | 126.81(8)   | H(10A)-C(10)-H(10C) | 109.5      |
| C(9)-P(3)-C(26)  | 106.50(10)  | H(10B)-C(10)-H(10C) | 109.5      |
| C(9)-P(3)-C(23)  | 110.63(10)  | C(10)-C(11)-C(12)   | 111.00(19) |
| C(26)-P(3)-C(23) | 102.30(10)  | C(10)-C(11)-P(1)    | 110.63(16) |
| C(9)-P(3)-Mn     | 107.80(6)   | C(12)-C(11)-P(1)    | 115.07(16) |
| C(26)-P(3)-Mn    | 105.14(7)   | C(10)-C(11)-H(11)   | 106.5      |
| C(23)-P(3)-Mn    | 123.07(7)   | C(12)-C(11)-H(11)   | 106.5      |
| C(1)-B-C(7)      | 108.47(18)  | P(1)-C(11)-H(11)    | 106.5      |
| C(1)-B-C(9)      | 104.48(16)  | C(11)-C(12)-H(12A)  | 109.5      |
| C(7)-B-C(9)      | 112.67(17)  | C(11)-C(12)-H(12B)  | 109.5      |
| C(1)-B-C(8)      | 106.37(16)  | H(12A)-C(12)-H(12B) | 109.5      |
| C(7)-B-C(8)      | 111.08(17)  | C(11)-C(12)-H(12C)  | 109.5      |
| C(9)-B-C(8)      | 113.25(18)  | H(12A)-C(12)-H(12C) | 109.5      |
| C(2)-C(1)-C(6)   | 114.80(19)  | H(12B)-C(12)-H(12C) | 109.5      |
| C(2)-C(1)-B      | 123.99(19)  | C(14)-C(13)-H(13A)  | 109.5      |
| C(6)-C(1)-B      | 121.19(19)  | C(14)-C(13)-H(13B)  | 109.5      |
| C(3)-C(2)-C(1)   | 122.7(2)    | H(13A)-C(13)-H(13B) | 109.5      |
| C(3)-C(2)-H(2)   | 118.6       | C(14)-C(13)-H(13C)  | 109.5      |
| C(1)-C(2)-H(2)   | 118.6       | H(13A)-C(13)-H(13C) | 109.5      |
| C(4)-C(3)-C(2)   | 120.5(2)    | H(13B)-C(13)-H(13C) | 109.5      |
| C(4)-C(3)-H(3)   | 119.7       | C(15)-C(14)-C(13)   | 111.00(19) |
| C(2)-C(3)-H(3)   | 119.7       | C(15)-C(14)-P(1)    | 115.07(15) |
| C(3)-C(4)-C(5)   | 118.5(2)    | C(13)-C(14)-P(1)    | 110.09(15) |
| C(3)-C(4)-H(4)   | 120.7       | C(15)-C(14)-H(14)   | 106.7      |
| C(5)-C(4)-H(4)   | 120.7       | C(13)-C(14)-H(14)   | 106.7      |
| C(4)-C(5)-C(6)   | 120.3(2)    | P(1)-C(14)-H(14)    | 106.7      |
| C(4)-C(5)-H(5)   | 119.8       | C(14)-C(15)-H(15A)  | 109.5      |
| C(6)-C(5)-H(5)   | 119.8       | C(14)-C(15)-H(15B)  | 109.5      |
| C(5)-C(6)-C(1)   | 123.1(2)    | H(15A)-C(15)-H(15B) | 109.5      |
| C(5)-C(6)-H(6)   | 118.5       | C(14)-C(15)-H(15C)  | 109.5      |
| C(1)-C(6)-H(6)   | 118.5       | H(15A)-C(15)-H(15C) | 109.5      |
| B-C(7)-P(1)      | 119.08(15)  | H(15B)-C(15)-H(15C) | 109.5      |
| B-C(7)-H(7A)     | 107.5       | C(17)-C(16)-H(16A)  | 109.5      |
| P(1)-C(7)-H(7A)  | 107.5       | C(17)-C(16)-H(16B)  | 109.5      |
| B-C(7)-H(7B)     | 107.5       | H(16A)-C(16)-H(16B) | 109.5      |
| P(1)-C(7)-H(7B)  | 107.5       | C(17)-C(16)-H(16C)  | 109.5      |
|                  |             | H(16A)-C(16)-H(16C) | 109.5      |

|                     |            |                     |            |
|---------------------|------------|---------------------|------------|
| H(16B)-C(16)-H(16C) | 109.5      | C(23)-C(24)-H(24A)  | 109.5      |
| C(18)-C(17)-C(16)   | 111.07(19) | C(23)-C(24)-H(24B)  | 109.5      |
| C(18)-C(17)-P(2)    | 114.79(17) | H(24A)-C(24)-H(24B) | 109.5      |
| C(16)-C(17)-P(2)    | 110.79(16) | C(23)-C(24)-H(24C)  | 109.5      |
| C(18)-C(17)-H(17)   | 106.6      | H(24A)-C(24)-H(24C) | 109.5      |
| C(16)-C(17)-H(17)   | 106.6      | H(24B)-C(24)-H(24C) | 109.5      |
| P(2)-C(17)-H(17)    | 106.6      | C(26)-C(25)-H(25A)  | 109.5      |
| C(17)-C(18)-H(18A)  | 109.5      | C(26)-C(25)-H(25B)  | 109.5      |
| C(17)-C(18)-H(18B)  | 109.5      | H(25A)-C(25)-H(25B) | 109.5      |
| H(18A)-C(18)-H(18B) | 109.5      | C(26)-C(25)-H(25C)  | 109.5      |
| C(17)-C(18)-H(18C)  | 109.5      | H(25A)-C(25)-H(25C) | 109.5      |
| H(18A)-C(18)-H(18C) | 109.5      | H(25B)-C(25)-H(25C) | 109.5      |
| H(18B)-C(18)-H(18C) | 109.5      | C(25)-C(26)-C(27)   | 111.36(17) |
| C(20)-C(19)-H(19A)  | 109.5      | C(25)-C(26)-P(3)    | 109.88(15) |
| C(20)-C(19)-H(19B)  | 109.5      | C(27)-C(26)-P(3)    | 114.84(15) |
| H(19A)-C(19)-H(19B) | 109.5      | C(25)-C(26)-H(26)   | 106.8      |
| C(20)-C(19)-H(19C)  | 109.5      | C(27)-C(26)-H(26)   | 106.8      |
| H(19A)-C(19)-H(19C) | 109.5      | P(3)-C(26)-H(26)    | 106.8      |
| H(19B)-C(19)-H(19C) | 109.5      | C(26)-C(27)-H(27A)  | 109.5      |
| C(19)-C(20)-C(21)   | 112.40(19) | C(26)-C(27)-H(27B)  | 109.5      |
| C(19)-C(20)-P(2)    | 110.33(15) | H(27A)-C(27)-H(27B) | 109.5      |
| C(21)-C(20)-P(2)    | 115.20(16) | C(26)-C(27)-H(27C)  | 109.5      |
| C(19)-C(20)-H(20)   | 106.1      | H(27A)-C(27)-H(27C) | 109.5      |
| C(21)-C(20)-H(20)   | 106.1      | H(27B)-C(27)-H(27C) | 109.5      |
| P(2)-C(20)-H(20)    | 106.1      | C(30)#1-C(28)-C(29) | 119.5(2)   |
| C(20)-C(21)-H(21A)  | 109.5      | C(30)#1-C(28)-H(28) | 120.3      |
| C(20)-C(21)-H(21B)  | 109.5      | C(29)-C(28)-H(28)   | 120.3      |
| H(21A)-C(21)-H(21B) | 109.5      | C(30)-C(29)-C(28)   | 120.2(2)   |
| C(20)-C(21)-H(21C)  | 109.5      | C(30)-C(29)-H(29)   | 119.9      |
| H(21A)-C(21)-H(21C) | 109.5      | C(28)-C(29)-H(29)   | 119.9      |
| H(21B)-C(21)-H(21C) | 109.5      | C(29)-C(30)-C(28)#1 | 120.3(2)   |
| C(23)-C(22)-H(22A)  | 109.5      | C(29)-C(30)-H(30)   | 119.9      |
| C(23)-C(22)-H(22B)  | 109.5      | C(28)#1-C(30)-H(30) | 119.9      |
| H(22A)-C(22)-H(22B) | 109.5      | C(32)-C(31)-C(33)#2 | 120.2(3)   |
| C(23)-C(22)-H(22C)  | 109.5      | C(32)-C(31)-H(31)   | 119.9      |
| H(22A)-C(22)-H(22C) | 109.5      | C(33)#2-C(31)-H(31) | 119.9      |
| H(22B)-C(22)-H(22C) | 109.5      | C(31)-C(32)-C(33)   | 120.8(2)   |
| C(24)-C(23)-C(22)   | 110.92(19) | C(31)-C(32)-H(32)   | 119.6      |
| C(24)-C(23)-P(3)    | 114.71(15) | C(33)-C(32)-H(32)   | 119.6      |
| C(22)-C(23)-P(3)    | 110.31(15) | C(32)-C(33)-C(31)#2 | 119.1(2)   |
| C(24)-C(23)-H(23)   | 106.8      | C(32)-C(33)-H(33)   | 120.5      |
| C(22)-C(23)-H(23)   | 106.8      | C(31)#2-C(33)-H(33) | 120.5      |
| P(3)-C(23)-H(23)    | 106.8      |                     |            |

---

Symmetry transformations used to generate equivalent atoms:

#1 -x+1,-y+1,-z+1 #2 -x+2,-y+1,-z

**Table 12. Anisotropic displacement parameters ( $\text{\AA}^2 \times 10^4$ ) for  $[\text{PhBP}^{\text{iPr}}_3]\text{MnI}$  (2). The anisotropic displacement factor exponent takes the form:  $-2\pi^2[\text{h}^2\text{a}^*2\text{U}^{11} + \dots + 2\text{h k a}^* \text{b}^* \text{U}^{12}]$**

|       | $U^{11}$ | $U^{22}$ | $U^{33}$ | $U^{23}$ | $U^{13}$ | $U^{12}$ |
|-------|----------|----------|----------|----------|----------|----------|
| Mn    | 122(2)   | 136(2)   | 140(2)   | -21(1)   | -9(1)    | -36(1)   |
| P(1)  | 132(3)   | 142(3)   | 164(3)   | -14(2)   | -30(2)   | -20(2)   |
| P(2)  | 156(3)   | 149(3)   | 147(3)   | -11(2)   | -1(2)    | -47(2)   |
| P(3)  | 128(3)   | 131(3)   | 138(3)   | -18(2)   | 3(2)     | -26(2)   |
| B     | 140(12)  | 118(13)  | 158(13)  | -39(10)  | -17(9)   | -17(10)  |
| I     | 216(1)   | 243(1)   | 241(1)   | -56(1)   | -50(1)   | -97(1)   |
| C(1)  | 110(10)  | 153(12)  | 152(11)  | -57(9)   | 17(8)    | -3(8)    |
| C(2)  | 139(10)  | 180(12)  | 168(11)  | -24(9)   | -10(8)   | -16(9)   |
| C(3)  | 172(11)  | 172(13)  | 323(14)  | -70(11)  | 26(10)   | -60(10)  |
| C(4)  | 142(11)  | 285(15)  | 256(13)  | -114(11) | -42(9)   | -43(10)  |
| C(5)  | 196(11)  | 274(15)  | 201(12)  | -25(10)  | -60(9)   | -33(10)  |
| C(6)  | 177(11)  | 196(13)  | 215(12)  | -10(10)  | -22(9)   | -52(9)   |
| C(7)  | 131(10)  | 160(12)  | 155(11)  | -26(9)   | -25(8)   | -26(9)   |
| C(8)  | 134(10)  | 151(12)  | 146(11)  | -32(9)   | -20(8)   | -21(9)   |
| C(9)  | 131(10)  | 150(12)  | 144(11)  | -20(9)   | -5(8)    | -29(9)   |
| C(10) | 391(15)  | 277(15)  | 196(13)  | 6(11)    | -84(11)  | -58(12)  |
| C(11) | 193(11)  | 205(13)  | 209(12)  | 15(10)   | -48(9)   | 0(10)    |
| C(12) | 451(16)  | 303(16)  | 354(16)  | 187(13)  | -164(12) | -179(13) |
| C(13) | 141(11)  | 316(15)  | 370(15)  | -100(12) | -14(10)  | -33(10)  |
| C(14) | 145(11)  | 183(13)  | 212(12)  | -25(10)  | -9(9)    | -15(9)   |
| C(15) | 205(12)  | 222(14)  | 349(15)  | -87(11)  | 19(10)   | -12(10)  |
| C(16) | 220(13)  | 497(19)  | 340(15)  | -77(13)  | 61(11)   | -164(12) |
| C(17) | 233(12)  | 332(15)  | 210(13)  | -41(11)  | 77(10)   | -120(11) |
| C(18) | 235(13)  | 390(17)  | 298(14)  | -79(12)  | 86(11)   | -47(12)  |
| C(19) | 261(13)  | 175(13)  | 291(14)  | -25(11)  | 12(10)   | -58(10)  |
| C(20) | 218(12)  | 180(13)  | 240(13)  | 3(10)    | -23(9)   | -19(10)  |
| C(21) | 271(13)  | 209(13)  | 214(13)  | 22(10)   | -47(10)  | -5(10)   |
| C(22) | 232(12)  | 166(13)  | 382(15)  | -91(11)  | -16(11)  | -19(10)  |
| C(23) | 182(11)  | 127(12)  | 179(11)  | -20(9)   | 32(9)    | -3(9)    |
| C(24) | 214(12)  | 210(14)  | 317(14)  | -22(11)  | -5(10)   | 60(10)   |
| C(25) | 210(11)  | 208(13)  | 162(12)  | -20(10)  | 14(9)    | -41(10)  |
| C(26) | 153(10)  | 144(12)  | 156(11)  | 8(9)     | -4(8)    | -30(9)   |
| C(27) | 232(12)  | 321(15)  | 245(13)  | 50(11)   | 2(10)    | -129(11) |
| C(28) | 316(14)  | 211(14)  | 298(14)  | -61(11)  | -2(11)   | -38(11)  |
| C(29) | 365(14)  | 218(14)  | 265(14)  | 23(11)   | -65(11)  | 29(11)   |
| C(30) | 284(13)  | 251(15)  | 337(15)  | -32(12)  | -85(11)  | 6(11)    |
| C(31) | 268(13)  | 316(17)  | 479(17)  | 167(14)  | 89(12)   | -42(12)  |
| C(32) | 507(17)  | 191(14)  | 347(15)  | -8(12)   | 242(13)  | 0(13)    |
| C(33) | 535(18)  | 312(17)  | 267(15)  | 20(12)   | 31(13)   | -196(14) |

**Table 13. Crystal Data and Structure Analysis Details for [PhBP<sup>iPr</sup><sub>3</sub>]Mn(N<sub>3</sub>) (3).**

|                         |                                                                                                                                           |
|-------------------------|-------------------------------------------------------------------------------------------------------------------------------------------|
| Empirical formula       | C <sub>54</sub> H <sub>106</sub> B <sub>2</sub> Cl <sub>0.36</sub> Mn <sub>1.90</sub> N <sub>4.63</sub> P <sub>6</sub> Tl <sub>0.10</sub> |
| Formula weight          | 1165.21                                                                                                                                   |
| Crystallization solvent | benzene/petroleum ether                                                                                                                   |
| Crystal shape           | rough plate                                                                                                                               |
| Crystal color           | colorless                                                                                                                                 |
| Crystal size            | 0.30 x 0.30 x 0.37 mm                                                                                                                     |

### Data Collection

|                                                                 |                                                                                                                  |
|-----------------------------------------------------------------|------------------------------------------------------------------------------------------------------------------|
| Preliminary photograph(s)                                       | rotation                                                                                                         |
| Type of diffractometer                                          | Bruker SMART 1000                                                                                                |
| Wavelength                                                      | 0.71073 Å MoK $\alpha$                                                                                           |
| Data collection temperature                                     | 100 K                                                                                                            |
| Theta range for 32076 reflections used in lattice determination | 2.24 to 31.43°                                                                                                   |
| Unit cell dimensions                                            | a = 11.946(2) Å $\alpha = 90^\circ$<br>b = 34.586(7) Å $\beta = 90^\circ$<br>c = 15.423(3) Å $\gamma = 90^\circ$ |
| Volume                                                          | 6372(2) Å <sup>3</sup>                                                                                           |
| Z                                                               | 4                                                                                                                |
| Crystal system                                                  | orthorhombic                                                                                                     |
| Space group                                                     | P n c 2 (# 30)                                                                                                   |
| Density (calculated)                                            | 1.215 g/cm <sup>3</sup>                                                                                          |
| F(000)                                                          | 2496                                                                                                             |
| Theta range for data collection                                 | 1.5 to 32.1°                                                                                                     |
| Completeness to theta = 32.12°                                  | 89.6%                                                                                                            |
| Index ranges                                                    | -17 ≤ h ≤ 17, -50 ≤ k ≤ 40, -18 ≤ l ≤ 22                                                                         |
| Data collection scan type                                       | $\omega$ scans                                                                                                   |
| Reflections collected                                           | 75921                                                                                                            |
| Independent reflections                                         | 17907 [R <sub>int</sub> = 0.0716]                                                                                |
| Reflections > 2 $\sigma$ (I)                                    | 12030                                                                                                            |
| Average $\sigma$ (I)/(net I)                                    | 0.0713                                                                                                           |
| Absorption coefficient                                          | 0.83 mm <sup>-1</sup>                                                                                            |
| Absorption correction                                           | none                                                                                                             |
| Reflections monitored for decay                                 | initial data recollected at end                                                                                  |
| Decay of standards                                              | 0%                                                                                                               |

**Table 13 (cont.)****Structure Solution and Refinement**

|                                                |                                                                                                                                 |
|------------------------------------------------|---------------------------------------------------------------------------------------------------------------------------------|
| Primary solution method                        | direct methods                                                                                                                  |
| Secondary solution method                      | difference map                                                                                                                  |
| Hydrogen placement                             | calculated                                                                                                                      |
| Refinement method                              | Full-matrix least-squares on F <sup>2</sup>                                                                                     |
| Data / restraints / parameters                 | 17907 / 2 / 654                                                                                                                 |
| Treatment of hydrogen atoms                    | not refined, U <sub>iso</sub> fixed at 120% U <sub>eq</sub> of attached atom                                                    |
| Goodness-of-fit on F <sup>2</sup>              | 1.49                                                                                                                            |
| Final R indices [I > 2σ(I), 12030 reflections] | R1 = 0.0573, wR2 = 0.0751                                                                                                       |
| R indices (all data)                           | R1 = 0.0938, wR2 = 0.0783                                                                                                       |
| Type of weighting scheme used                  | sigma                                                                                                                           |
| Weighting scheme used                          | calc w=1/[σ <sup>2</sup> (F <sub>o</sub> <sup>2</sup> )] where P=(F <sub>o</sub> <sup>2</sup> +2F <sub>c</sub> <sup>2</sup> )/3 |
| Max shift/error                                | 0.017                                                                                                                           |
| Average shift/error                            | 0.000                                                                                                                           |
| Absolute structure parameter                   | 0.013(8)                                                                                                                        |
| Largest diff. peak and hole                    | 1.12 and -0.53 e·Å <sup>-3</sup>                                                                                                |

**Programs Used**

|                      |                     |
|----------------------|---------------------|
| Cell refinement      | Bruker SMART 5.606  |
| Data collection      | Bruker SMART 5.054  |
| Data reduction       | Bruker SAINT 6.45   |
| Structure solution   | Bruker SHELXTL 6.14 |
| Structure refinement | Bruker SHELXTL 6.14 |

**Special Refinement Details**

One bad reflection (200) was omitted. A small amount of Tl[ligand] and [ligand]MnCl had cocrystallized with **3** and their population were refined to 5 and 18 % respectively per [ligand]Mn(N<sub>3</sub>). This structure was problematic because the crystal may have undergone a phase transition at low temperatures. It was initially solved in the Pbcn space group but there were 302 systematic absence violations as a result. The structure refined in this space group with a final GOOF of 3.58 and R1 = 0.1375, wR2 = 0.1525. The poor solution led us to remove the c-glide and to resolve the structure in the Pnc2 space group. Much better values for GOOF and the R indices were obtained and this is the solution that is presented.

Refinement of F<sup>2</sup> against ALL reflections. The weighted R-factor (wR) and goodness of fit (S) are based on F<sup>2</sup>, conventional R-factors (R) are based on F, with F set to zero for negative F<sup>2</sup>. The threshold expression of F<sup>2</sup> > 2σ(F<sup>2</sup>) is used only for calculating R-factors(gt) etc. and is not relevant to the choice of reflections for refinement. R-factors based on F<sup>2</sup> are statistically about twice as large as those based on F, and R-factors based on ALL data will be even larger.

All esds (except the esd in the dihedral angle between two l.s. planes) are estimated using the full covariance matrix. The cell esds are taken into account individually in the estimation of esds in distances, angles and torsion angles; correlations between esds in cell parameters are only used when they are defined by crystal symmetry. An approximate (isotropic) treatment of cell esds is used for estimating esds involving l.s. planes.

**Table 14. Atomic coordinates ( $\times 10^4$ ) and equivalent isotropic displacement parameters ( $\text{\AA}^2 \times 10^3$ ) for  $[\text{PhBP}^{i\text{Pr}}_3\text{Mn}(\text{N}_3)]$  (3).  $U(\text{eq})$  is defined as one third of the trace of the orthogonalized  $U^{ij}$  tensor.**

|        | x        | y       | z       | $U_{\text{eq}}$ |
|--------|----------|---------|---------|-----------------|
| Mn(1A) | 2646(1)  | 8543(1) | 5378(1) | 27(1)           |
| P(1A)  | 4359(1)  | 8130(1) | 5666(1) | 30(1)           |
| P(2A)  | 3461(1)  | 8807(1) | 3992(1) | 26(1)           |
| P(3A)  | 3438(1)  | 9084(1) | 6284(1) | 39(1)           |
| B(1A)  | 5468(3)  | 8877(2) | 5185(4) | 32(1)           |
| N(1A)  | 1044(2)  | 8346(1) | 5537(2) | 28(1)           |
| N(2A)  | 544(3)   | 8323(1) | 6143(3) | 44(1)           |
| N(3A)  | -68(4)   | 8291(1) | 6757(3) | 67(1)           |
| C(1A)  | 6740(3)  | 9067(1) | 5057(3) | 29(1)           |
| C(2A)  | 7731(3)  | 8886(1) | 5262(3) | 34(1)           |
| C(3A)  | 8776(3)  | 9061(2) | 5154(4) | 45(1)           |
| C(4A)  | 8856(4)  | 9429(1) | 4868(3) | 40(1)           |
| C(5A)  | 7873(4)  | 9623(1) | 4655(4) | 56(2)           |
| C(6A)  | 6861(4)  | 9435(2) | 4730(4) | 51(1)           |
| C(7A)  | 5566(3)  | 8457(1) | 5681(3) | 30(1)           |
| C(8A)  | 4966(3)  | 8830(1) | 4181(3) | 29(1)           |
| C(9A)  | 4776(3)  | 9208(1) | 5794(3) | 33(1)           |
| C(10A) | 3384(4)  | 7646(2) | 6925(4) | 54(2)           |
| C(11A) | 4461(4)  | 7837(2) | 6653(4) | 58(2)           |
| C(12A) | 5505(4)  | 7648(2) | 6865(4) | 102(3)          |
| C(13A) | 3586(3)  | 7512(2) | 4655(3) | 51(1)           |
| C(14A) | 4530(3)  | 7811(1) | 4714(3) | 37(1)           |
| C(15A) | 5644(4)  | 7645(2) | 4518(4) | 61(2)           |
| C(16A) | 2213(4)  | 8305(2) | 2949(3) | 54(2)           |
| C(17A) | 3182(4)  | 8570(2) | 2925(3) | 63(2)           |
| C(18A) | 4124(4)  | 8479(2) | 2372(3) | 76(2)           |
| C(19A) | 1738(3)  | 9324(1) | 3644(3) | 38(1)           |
| C(20A) | 2971(4)  | 9314(1) | 3842(3) | 38(1)           |
| C(21A) | 3686(4)  | 9565(1) | 3285(4) | 56(1)           |
| C(22A) | 1537(4)  | 9552(2) | 6272(6) | 117(3)          |
| C(23A) | 2633(4)  | 9539(2) | 6489(6) | 92(3)           |
| C(24A) | 3296(3)  | 9898(1) | 6671(4) | 56(2)           |
| C(25A) | 2731(4)  | 8710(2) | 7783(4) | 75(2)           |
| C(26A) | 3757(4)  | 8892(2) | 7367(3) | 52(1)           |
| C(27A) | 4310(4)  | 9185(2) | 7992(4) | 71(2)           |
| Mn(1B) | 7584(1)  | 6439(1) | 5146(1) | 23(1)           |
| P(1B)  | 9305(1)  | 6842(1) | 4838(1) | 22(1)           |
| P(2B)  | 8389(1)  | 6200(1) | 6565(1) | 24(1)           |
| P(3B)  | 8364(1)  | 5878(1) | 4298(1) | 30(1)           |
| B(1B)  | 10409(3) | 6099(1) | 5391(3) | 23(1)           |
| N(1B)  | 6097(8)  | 6635(3) | 5036(7) | 61(4)           |
| N(2B)  | 5471(4)  | 6669(2) | 4363(4) | 18(1)           |
| N(3B)  | 4893(6)  | 6717(2) | 3776(6) | 50(2)           |
| Cl     | 5778(3)  | 6650(1) | 4920(3) | 39(1)           |
| Tl     | 7076(2)  | 6508(1) | 5122(1) | 25(1)           |
| C(1B)  | 11649(3) | 5916(1) | 5526(3) | 29(1)           |

|        |          |         |         |       |
|--------|----------|---------|---------|-------|
| C(2B)  | 12663(3) | 6087(2) | 5274(4) | 39(1) |
| C(3B)  | 13699(3) | 5908(1) | 5381(4) | 45(1) |
| C(4B)  | 13756(4) | 5545(2) | 5788(3) | 45(1) |
| C(5B)  | 12796(4) | 5373(1) | 6067(3) | 46(1) |
| C(6B)  | 11766(4) | 5552(1) | 5943(3) | 41(1) |
| C(7B)  | 10515(3) | 6516(1) | 4862(3) | 26(1) |
| C(8B)  | 9903(3)  | 6172(1) | 6396(3) | 24(1) |
| C(9B)  | 9711(3)  | 5764(1) | 4817(3) | 28(1) |
| C(10B) | 8371(3)  | 7316(2) | 3523(4) | 51(1) |
| C(11B) | 9438(3)  | 7112(1) | 3802(3) | 32(1) |
| C(12B) | 10456(3) | 7369(1) | 3720(3) | 48(1) |
| C(13B) | 8609(3)  | 7502(1) | 5741(3) | 37(1) |
| C(14B) | 9476(3)  | 7176(1) | 5746(3) | 36(1) |
| C(15B) | 10654(3) | 7329(1) | 5973(3) | 38(1) |
| C(16B) | 7226(4)  | 6756(2) | 7505(4) | 52(1) |
| C(17B) | 8071(4)  | 6433(1) | 7625(3) | 37(1) |
| C(18B) | 9066(3)  | 6562(1) | 8142(3) | 41(1) |
| C(19B) | 6659(3)  | 5685(1) | 6919(3) | 38(1) |
| C(20B) | 7917(4)  | 5692(1) | 6751(3) | 36(1) |
| C(21B) | 8578(4)  | 5476(1) | 7444(4) | 64(2) |
| C(22B) | 6476(4)  | 5404(2) | 4389(5) | 81(2) |
| C(23B) | 7542(5)  | 5456(2) | 3965(5) | 17(2) |
| C(23C) | 7669(6)  | 5382(2) | 4411(6) | 28(2) |
| C(24B) | 8235(3)  | 5062(1) | 3986(3) | 41(1) |
| C(25B) | 7669(3)  | 6240(2) | 2753(4) | 55(2) |
| C(26B) | 8702(3)  | 6052(1) | 3205(3) | 39(1) |
| C(27B) | 9275(4)  | 5764(2) | 2589(4) | 62(2) |

---

**Table 15. Bond lengths [ $\text{\AA}$ ] and angles [ $^\circ$ ] for  $[\text{PhBP}^{\text{iPr}}_3]\text{Mn}(\text{N}_3)$  (3).**

|               |            |               |            |
|---------------|------------|---------------|------------|
| Mn(1A)-N(1A)  | 2.046(3)   | C(15A)-H(15A) | 0.9600     |
| Mn(1A)-P(3A)  | 2.5205(15) | C(15A)-H(15B) | 0.9600     |
| Mn(1A)-P(2A)  | 2.5217(14) | C(15A)-H(15C) | 0.9600     |
| Mn(1A)-P(1A)  | 2.5339(13) | C(16A)-C(17A) | 1.477(7)   |
| P(1A)-C(7A)   | 1.831(4)   | C(16A)-H(16A) | 0.9600     |
| P(1A)-C(11A)  | 1.834(5)   | C(16A)-H(16B) | 0.9600     |
| P(1A)-C(14A)  | 1.850(5)   | C(16A)-H(16C) | 0.9600     |
| P(2A)-C(8A)   | 1.823(4)   | C(17A)-C(18A) | 1.447(6)   |
| P(2A)-C(20A)  | 1.862(5)   | C(17A)-H(17A) | 0.9800     |
| P(2A)-C(17A)  | 1.868(5)   | C(18A)-H(18A) | 0.9600     |
| P(3A)-C(9A)   | 1.819(4)   | C(18A)-H(18B) | 0.9600     |
| P(3A)-C(26A)  | 1.838(5)   | C(18A)-H(18C) | 0.9600     |
| P(3A)-C(23A)  | 1.871(6)   | C(19A)-C(20A) | 1.505(6)   |
| B(1A)-C(7A)   | 1.648(7)   | C(19A)-H(19A) | 0.9600     |
| B(1A)-C(1A)   | 1.666(5)   | C(19A)-H(19B) | 0.9600     |
| B(1A)-C(8A)   | 1.668(7)   | C(19A)-H(19C) | 0.9600     |
| B(1A)-C(9A)   | 1.694(7)   | C(20A)-C(21A) | 1.490(6)   |
| N(1A)-N(2A)   | 1.112(5)   | C(20A)-H(20A) | 0.9800     |
| N(2A)-N(3A)   | 1.202(6)   | C(21A)-H(21A) | 0.9600     |
| C(1A)-C(2A)   | 1.376(5)   | C(21A)-H(21B) | 0.9600     |
| C(1A)-C(6A)   | 1.377(6)   | C(21A)-H(21C) | 0.9600     |
| C(2A)-C(3A)   | 1.397(5)   | C(22A)-C(23A) | 1.352(6)   |
| C(2A)-H(2A)   | 0.9300     | C(22A)-H(22A) | 0.9600     |
| C(3A)-C(4A)   | 1.350(6)   | C(22A)-H(22B) | 0.9600     |
| C(3A)-H(3A)   | 0.9300     | C(22A)-H(22C) | 0.9600     |
| C(4A)-C(5A)   | 1.391(6)   | C(23A)-C(24A) | 1.498(7)   |
| C(4A)-H(4A)   | 0.9300     | C(23A)-H(23A) | 0.9800     |
| C(5A)-C(6A)   | 1.378(6)   | C(24A)-H(24A) | 0.9600     |
| C(5A)-H(5A)   | 0.9300     | C(24A)-H(24B) | 0.9600     |
| C(6A)-H(6A)   | 0.9300     | C(24A)-H(24C) | 0.9600     |
| C(7A)-H(7A1)  | 0.9700     | C(25A)-C(26A) | 1.519(7)   |
| C(7A)-H(7A2)  | 0.9700     | C(25A)-H(25A) | 0.9600     |
| C(8A)-H(8A1)  | 0.9700     | C(25A)-H(25B) | 0.9600     |
| C(8A)-H(8A2)  | 0.9700     | C(25A)-H(25C) | 0.9600     |
| C(9A)-H(9A1)  | 0.9700     | C(26A)-C(27A) | 1.547(7)   |
| C(9A)-H(9A2)  | 0.9700     | C(26A)-H(26A) | 0.9800     |
| C(10A)-C(11A) | 1.505(6)   | C(27A)-H(27A) | 0.9600     |
| C(10A)-H(10A) | 0.9600     | C(27A)-H(27B) | 0.9600     |
| C(10A)-H(10B) | 0.9600     | C(27A)-H(27C) | 0.9600     |
| C(10A)-H(10C) | 0.9600     | Mn(1B)-N(1B)  | 1.909(10)  |
| C(11A)-C(12A) | 1.445(6)   | Mn(1B)-Cl     | 2.304(4)   |
| C(11A)-H(11A) | 0.9800     | Mn(1B)-P(3B)  | 2.5162(15) |
| C(12A)-H(12A) | 0.9600     | Mn(1B)-P(1B)  | 2.5298(13) |
| C(12A)-H(12B) | 0.9600     | Mn(1B)-P(2B)  | 2.5302(16) |
| C(12A)-H(12C) | 0.9600     | P(1B)-C(14B)  | 1.826(5)   |
| C(13A)-C(14A) | 1.532(6)   | P(1B)-C(7B)   | 1.834(4)   |
| C(13A)-H(13A) | 0.9600     | P(1B)-C(11B)  | 1.857(4)   |
| C(13A)-H(13B) | 0.9600     | P(1B)-TI      | 2.9366(19) |
| C(13A)-H(13C) | 0.9600     | P(2B)-C(8B)   | 1.830(4)   |
| C(14A)-C(15A) | 1.480(6)   | P(2B)-C(17B)  | 1.861(5)   |
| C(14A)-H(14A) | 0.9800     | P(2B)-C(20B)  | 1.865(4)   |



|               |           |                     |            |
|---------------|-----------|---------------------|------------|
| P(2B)-T1      | 2.923(2)  | C(18B)-H(18E)       | 0.9600     |
| P(3B)-C(23B)  | 1.834(7)  | C(18B)-H(18F)       | 0.9600     |
| P(3B)-C(26B)  | 1.835(5)  | C(19B)-C(20B)       | 1.526(6)   |
| P(3B)-C(9B)   | 1.841(4)  | C(19B)-H(19D)       | 0.9600     |
| P(3B)-C(23C)  | 1.915(8)  | C(19B)-H(19E)       | 0.9600     |
| P(3B)-T1      | 2.953(2)  | C(19B)-H(19F)       | 0.9600     |
| B(1B)-C(1B)   | 1.623(5)  | C(20B)-C(21B)       | 1.526(6)   |
| B(1B)-C(7B)   | 1.661(6)  | C(20B)-H(20B)       | 0.9800     |
| B(1B)-C(9B)   | 1.680(6)  | C(21B)-H(21D)       | 0.9600     |
| B(1B)-C(8B)   | 1.683(7)  | C(21B)-H(21E)       | 0.9600     |
| N(1B)-N(2B)   | 1.285(13) | C(21B)-H(21F)       | 0.9600     |
| N(2B)-N(3B)   | 1.150(9)  | C(22B)-C(23C)       | 1.428(8)   |
| C(1B)-C(2B)   | 1.403(5)  | C(22B)-C(23B)       | 1.442(8)   |
| C(1B)-C(6B)   | 1.423(6)  | C(22B)-H(22D)       | 0.9570     |
| C(2B)-C(3B)   | 1.394(5)  | C(22B)-H(22E)       | 0.9725     |
| C(2B)-H(2B)   | 0.9300    | C(22B)-H(22F)       | 0.9385     |
| C(3B)-C(4B)   | 1.405(7)  | C(22B)-H(22G)       | 0.9827     |
| C(3B)-H(3B)   | 0.9300    | C(22B)-H(22H)       | 0.9481     |
| C(4B)-C(5B)   | 1.363(6)  | C(22B)-H(22I)       | 0.9492     |
| C(4B)-H(4B)   | 0.9300    | C(23B)-C(24B)       | 1.595(8)   |
| C(5B)-C(6B)   | 1.390(6)  | C(23B)-H(22G)       | 1.5659     |
| C(5B)-H(5B)   | 0.9300    | C(23B)-H(23B)       | 0.9685     |
| C(6B)-H(6B)   | 0.9300    | C(23C)-C(24B)       | 1.453(9)   |
| C(7B)-H(7B1)  | 0.9700    | C(23C)-H(22F)       | 1.5789     |
| C(7B)-H(7B2)  | 0.9700    | C(23C)-H(23C)       | 0.9931     |
| C(8B)-H(8B1)  | 0.9700    | C(24B)-H(24D)       | 0.9618     |
| C(8B)-H(8B2)  | 0.9700    | C(24B)-H(24E)       | 0.9559     |
| C(9B)-H(9B1)  | 0.9700    | C(24B)-H(24F)       | 0.9560     |
| C(9B)-H(9B2)  | 0.9700    | C(24B)-H(24G)       | 0.9570     |
| C(10B)-C(11B) | 1.519(6)  | C(24B)-H(24H)       | 0.9590     |
| C(10B)-H(10D) | 0.9600    | C(24B)-H(24I)       | 0.9567     |
| C(10B)-H(10E) | 0.9600    | C(25B)-C(26B)       | 1.560(6)   |
| C(10B)-H(10F) | 0.9600    | C(25B)-H(25D)       | 0.9600     |
| C(11B)-C(12B) | 1.513(6)  | C(25B)-H(25E)       | 0.9600     |
| C(11B)-H(11B) | 0.9800    | C(25B)-H(25F)       | 0.9600     |
| C(12B)-H(12D) | 0.9600    | C(26B)-C(27B)       | 1.538(7)   |
| C(12B)-H(12E) | 0.9600    | C(26B)-H(26B)       | 0.9800     |
| C(12B)-H(12F) | 0.9600    | C(27B)-H(27D)       | 0.9600     |
| C(13B)-C(14B) | 1.531(6)  | C(27B)-H(27E)       | 0.9600     |
| C(13B)-H(13D) | 0.9600    | C(27B)-H(27F)       | 0.9600     |
| C(13B)-H(13E) | 0.9600    |                     |            |
| C(13B)-H(13F) | 0.9600    | N(1A)-Mn(1A)-P(3A)  | 122.17(10) |
| C(14B)-C(15B) | 1.544(5)  | N(1A)-Mn(1A)-P(2A)  | 125.69(11) |
| C(14B)-H(14B) | 0.9800    | P(3A)-Mn(1A)-P(2A)  | 93.21(5)   |
| C(15B)-H(15D) | 0.9600    | N(1A)-Mn(1A)-P(1A)  | 123.13(10) |
| C(15B)-H(15E) | 0.9600    | P(3A)-Mn(1A)-P(1A)  | 91.04(5)   |
| C(15B)-H(15F) | 0.9600    | P(2A)-Mn(1A)-P(1A)  | 92.33(4)   |
| C(16B)-C(17B) | 1.518(7)  | C(7A)-P(1A)-C(11A)  | 106.2(2)   |
| C(16B)-H(16D) | 0.9600    | C(7A)-P(1A)-C(14A)  | 106.9(2)   |
| C(16B)-H(16E) | 0.9600    | C(11A)-P(1A)-C(14A) | 108.7(2)   |
| C(16B)-H(16F) | 0.9600    | C(7A)-P(1A)-Mn(1A)  | 106.92(14) |
| C(17B)-C(18B) | 1.500(6)  | C(11A)-P(1A)-Mn(1A) | 120.70(17) |
| C(17B)-H(17B) | 0.9800    | C(14A)-P(1A)-Mn(1A) | 106.68(15) |
| C(18B)-H(18D) | 0.9600    | C(8A)-P(2A)-C(20A)  | 106.8(2)   |

|                     |            |                      |          |
|---------------------|------------|----------------------|----------|
| C(8A)-P(2A)-C(17A)  | 109.7(2)   | H(9A1)-C(9A)-H(9A2)  | 106.9    |
| C(20A)-P(2A)-C(17A) | 104.4(3)   | C(11A)-C(10A)-H(10A) | 109.5    |
| C(8A)-P(2A)-Mn(1A)  | 105.10(15) | C(11A)-C(10A)-H(10B) | 109.5    |
| C(20A)-P(2A)-Mn(1A) | 108.96(16) | H(10A)-C(10A)-H(10B) | 109.5    |
| C(17A)-P(2A)-Mn(1A) | 121.21(19) | C(11A)-C(10A)-H(10C) | 109.5    |
| C(9A)-P(3A)-C(26A)  | 106.3(2)   | H(10A)-C(10A)-H(10C) | 109.5    |
| C(9A)-P(3A)-C(23A)  | 108.9(3)   | H(10B)-C(10A)-H(10C) | 109.5    |
| C(26A)-P(3A)-C(23A) | 105.0(4)   | C(12A)-C(11A)-C(10A) | 118.4(5) |
| C(9A)-P(3A)-Mn(1A)  | 105.90(15) | C(12A)-C(11A)-P(1A)  | 119.7(4) |
| C(26A)-P(3A)-Mn(1A) | 108.17(17) | C(10A)-C(11A)-P(1A)  | 114.7(3) |
| C(23A)-P(3A)-Mn(1A) | 121.7(2)   | C(12A)-C(11A)-H(11A) | 99.0     |
| C(7A)-B(1A)-C(1A)   | 109.7(3)   | C(10A)-C(11A)-H(11A) | 99.0     |
| C(7A)-B(1A)-C(8A)   | 111.7(4)   | P(1A)-C(11A)-H(11A)  | 99.0     |
| C(1A)-B(1A)-C(8A)   | 104.8(4)   | C(11A)-C(12A)-H(12A) | 109.5    |
| C(7A)-B(1A)-C(9A)   | 111.9(4)   | C(11A)-C(12A)-H(12B) | 109.5    |
| C(1A)-B(1A)-C(9A)   | 104.2(3)   | H(12A)-C(12A)-H(12B) | 109.5    |
| C(8A)-B(1A)-C(9A)   | 113.9(3)   | C(11A)-C(12A)-H(12C) | 109.5    |
| N(2A)-N(1A)-Mn(1A)  | 128.8(3)   | H(12A)-C(12A)-H(12C) | 109.5    |
| N(1A)-N(2A)-N(3A)   | 174.8(5)   | H(12B)-C(12A)-H(12C) | 109.5    |
| C(2A)-C(1A)-C(6A)   | 114.4(4)   | C(14A)-C(13A)-H(13A) | 109.5    |
| C(2A)-C(1A)-B(1A)   | 125.4(4)   | C(14A)-C(13A)-H(13B) | 109.5    |
| C(6A)-C(1A)-B(1A)   | 120.2(4)   | H(13A)-C(13A)-H(13B) | 109.5    |
| C(1A)-C(2A)-C(3A)   | 123.1(4)   | C(14A)-C(13A)-H(13C) | 109.5    |
| C(1A)-C(2A)-H(2A)   | 118.5      | H(13A)-C(13A)-H(13C) | 109.5    |
| C(3A)-C(2A)-H(2A)   | 118.5      | H(13B)-C(13A)-H(13C) | 109.5    |
| C(4A)-C(3A)-C(2A)   | 120.7(4)   | C(15A)-C(14A)-C(13A) | 112.9(4) |
| C(4A)-C(3A)-H(3A)   | 119.7      | C(15A)-C(14A)-P(1A)  | 119.5(3) |
| C(2A)-C(3A)-H(3A)   | 119.7      | C(13A)-C(14A)-P(1A)  | 111.7(3) |
| C(3A)-C(4A)-C(5A)   | 118.1(4)   | C(15A)-C(14A)-H(14A) | 103.5    |
| C(3A)-C(4A)-H(4A)   | 120.9      | C(13A)-C(14A)-H(14A) | 103.5    |
| C(5A)-C(4A)-H(4A)   | 120.9      | P(1A)-C(14A)-H(14A)  | 103.5    |
| C(6A)-C(5A)-C(4A)   | 119.6(4)   | C(14A)-C(15A)-H(15A) | 109.5    |
| C(6A)-C(5A)-H(5A)   | 120.2      | C(14A)-C(15A)-H(15B) | 109.5    |
| C(4A)-C(5A)-H(5A)   | 120.2      | H(15A)-C(15A)-H(15B) | 109.5    |
| C(1A)-C(6A)-C(5A)   | 124.0(4)   | C(14A)-C(15A)-H(15C) | 109.5    |
| C(1A)-C(6A)-H(6A)   | 118.0      | H(15A)-C(15A)-H(15C) | 109.5    |
| C(5A)-C(6A)-H(6A)   | 118.0      | H(15B)-C(15A)-H(15C) | 109.5    |
| B(1A)-C(7A)-P(1A)   | 118.9(3)   | C(17A)-C(16A)-H(16A) | 109.5    |
| B(1A)-C(7A)-H(7A1)  | 107.6      | C(17A)-C(16A)-H(16B) | 109.5    |
| P(1A)-C(7A)-H(7A1)  | 107.6      | H(16A)-C(16A)-H(16B) | 109.5    |
| B(1A)-C(7A)-H(7A2)  | 107.6      | C(17A)-C(16A)-H(16C) | 109.5    |
| P(1A)-C(7A)-H(7A2)  | 107.6      | H(16A)-C(16A)-H(16C) | 109.5    |
| H(7A1)-C(7A)-H(7A2) | 107.0      | H(16B)-C(16A)-H(16C) | 109.5    |
| B(1A)-C(8A)-P(2A)   | 120.5(3)   | C(18A)-C(17A)-C(16A) | 119.3(5) |
| B(1A)-C(8A)-H(8A1)  | 107.2      | C(18A)-C(17A)-P(2A)  | 118.4(4) |
| P(2A)-C(8A)-H(8A1)  | 107.2      | C(16A)-C(17A)-P(2A)  | 113.0(3) |
| B(1A)-C(8A)-H(8A2)  | 107.2      | C(18A)-C(17A)-H(17A) | 100.2    |
| P(2A)-C(8A)-H(8A2)  | 107.2      | C(16A)-C(17A)-H(17A) | 100.2    |
| H(8A1)-C(8A)-H(8A2) | 106.8      | P(2A)-C(17A)-H(17A)  | 100.2    |
| B(1A)-C(9A)-P(3A)   | 120.0(3)   | C(17A)-C(18A)-H(18A) | 109.5    |
| B(1A)-C(9A)-H(9A1)  | 107.3      | C(17A)-C(18A)-H(18B) | 109.5    |
| P(3A)-C(9A)-H(9A1)  | 107.3      | H(18A)-C(18A)-H(18B) | 109.5    |
| B(1A)-C(9A)-H(9A2)  | 107.3      | C(17A)-C(18A)-H(18C) | 109.5    |
| P(3A)-C(9A)-H(9A2)  | 107.3      | H(18A)-C(18A)-H(18C) | 109.5    |

|                      |          |                      |            |
|----------------------|----------|----------------------|------------|
| H(18B)-C(18A)-H(18C) | 109.5    | H(27B)-C(27A)-H(27C) | 109.5      |
| C(20A)-C(19A)-H(19A) | 109.5    | N(1B)-Mn(1B)-Cl      | 4.2(4)     |
| C(20A)-C(19A)-H(19B) | 109.5    | N(1B)-Mn(1B)-P(3B)   | 124.9(3)   |
| H(19A)-C(19A)-H(19B) | 109.5    | Cl-Mn(1B)-P(3B)      | 120.85(12) |
| C(20A)-C(19A)-H(19C) | 109.5    | N(1B)-Mn(1B)-P(1B)   | 122.9(3)   |
| H(19A)-C(19A)-H(19C) | 109.5    | Cl-Mn(1B)-P(1B)      | 123.87(11) |
| H(19B)-C(19A)-H(19C) | 109.5    | P(3B)-Mn(1B)-P(1B)   | 91.52(5)   |
| C(21A)-C(20A)-C(19A) | 115.4(4) | N(1B)-Mn(1B)-P(2B)   | 123.2(3)   |
| C(21A)-C(20A)-P(2A)  | 116.1(3) | Cl-Mn(1B)-P(2B)      | 126.18(12) |
| C(19A)-C(20A)-P(2A)  | 110.9(3) | P(3B)-Mn(1B)-P(2B)   | 93.27(5)   |
| C(21A)-C(20A)-H(20A) | 104.3    | P(1B)-Mn(1B)-P(2B)   | 91.92(5)   |
| C(19A)-C(20A)-H(20A) | 104.3    | C(14B)-P(1B)-C(7B)   | 106.58(18) |
| P(2A)-C(20A)-H(20A)  | 104.3    | C(14B)-P(1B)-C(11B)  | 109.4(2)   |
| C(20A)-C(21A)-H(21A) | 109.5    | C(7B)-P(1B)-C(11B)   | 104.94(19) |
| C(20A)-C(21A)-H(21B) | 109.5    | C(14B)-P(1B)-Mn(1B)  | 107.24(14) |
| H(21A)-C(21A)-H(21B) | 109.5    | C(7B)-P(1B)-Mn(1B)   | 107.31(13) |
| C(20A)-C(21A)-H(21C) | 109.5    | C(11B)-P(1B)-Mn(1B)  | 120.52(13) |
| H(21A)-C(21A)-H(21C) | 109.5    | C(14B)-P(1B)-Ti      | 103.69(14) |
| H(21B)-C(21A)-H(21C) | 109.5    | C(7B)-P(1B)-Ti       | 118.00(13) |
| C(23A)-C(22A)-H(22A) | 109.5    | C(11B)-P(1B)-Ti      | 113.84(13) |
| C(23A)-C(22A)-H(22B) | 109.5    | Mn(1B)-P(1B)-Ti      | 10.76(3)   |
| H(22A)-C(22A)-H(22B) | 109.5    | C(8B)-P(2B)-C(17B)   | 110.5(2)   |
| C(23A)-C(22A)-H(22C) | 109.5    | C(8B)-P(2B)-C(20B)   | 105.7(2)   |
| H(22A)-C(22A)-H(22C) | 109.5    | C(17B)-P(2B)-C(20B)  | 102.2(2)   |
| H(22B)-C(22A)-H(22C) | 109.5    | C(8B)-P(2B)-Mn(1B)   | 105.62(14) |
| C(22A)-C(23A)-C(24A) | 122.2(5) | C(17B)-P(2B)-Mn(1B)  | 122.74(17) |
| C(22A)-C(23A)-P(3A)  | 118.9(5) | C(20B)-P(2B)-Mn(1B)  | 108.98(16) |
| C(24A)-C(23A)-P(3A)  | 117.1(3) | C(8B)-P(2B)-Ti       | 116.16(14) |
| C(22A)-C(23A)-H(23A) | 94.5     | C(17B)-P(2B)-Ti      | 113.65(17) |
| C(24A)-C(23A)-H(23A) | 94.5     | C(20B)-P(2B)-Ti      | 107.30(16) |
| P(3A)-C(23A)-H(23A)  | 94.5     | Mn(1B)-P(2B)-Ti      | 11.00(3)   |
| C(23A)-C(24A)-H(24A) | 109.5    | C(23B)-P(3B)-C(26B)  | 97.0(3)    |
| C(23A)-C(24A)-H(24B) | 109.5    | C(23B)-P(3B)-C(9B)   | 114.7(3)   |
| H(24A)-C(24A)-H(24B) | 109.5    | C(26B)-P(3B)-C(9B)   | 106.11(19) |
| C(23A)-C(24A)-H(24C) | 109.5    | C(23B)-P(3B)-C(23C)  | 22.9(2)    |
| H(24A)-C(24A)-H(24C) | 109.5    | C(26B)-P(3B)-C(23C)  | 118.2(3)   |
| H(24B)-C(24A)-H(24C) | 109.5    | C(9B)-P(3B)-C(23C)   | 98.4(3)    |
| C(26A)-C(25A)-H(25A) | 109.5    | C(23B)-P(3B)-Mn(1B)  | 124.1(2)   |
| C(26A)-C(25A)-H(25B) | 109.5    | C(26B)-P(3B)-Mn(1B)  | 107.83(16) |
| H(25A)-C(25A)-H(25B) | 109.5    | C(9B)-P(3B)-Mn(1B)   | 105.30(14) |
| C(26A)-C(25A)-H(25C) | 109.5    | C(23C)-P(3B)-Mn(1B)  | 118.9(3)   |
| H(25A)-C(25A)-H(25C) | 109.5    | C(23B)-P(3B)-Ti      | 115.4(2)   |
| H(25B)-C(25A)-H(25C) | 109.5    | C(26B)-P(3B)-Ti      | 105.58(15) |
| C(25A)-C(26A)-C(27A) | 110.7(4) | C(9B)-P(3B)-Ti       | 115.30(14) |
| C(25A)-C(26A)-P(3A)  | 111.5(4) | C(23C)-P(3B)-Ti      | 113.3(2)   |
| C(27A)-C(26A)-P(3A)  | 114.6(4) | Mn(1B)-P(3B)-Ti      | 10.22(3)   |
| C(25A)-C(26A)-H(26A) | 106.5    | C(1B)-B(1B)-C(7B)    | 109.4(3)   |
| C(27A)-C(26A)-H(26A) | 106.5    | C(1B)-B(1B)-C(9B)    | 104.6(3)   |
| P(3A)-C(26A)-H(26A)  | 106.5    | C(7B)-B(1B)-C(9B)    | 112.2(4)   |
| C(26A)-C(27A)-H(27A) | 109.5    | C(1B)-B(1B)-C(8B)    | 105.5(3)   |
| C(26A)-C(27A)-H(27B) | 109.5    | C(7B)-B(1B)-C(8B)    | 110.5(3)   |
| H(27A)-C(27A)-H(27B) | 109.5    | C(9B)-B(1B)-C(8B)    | 114.2(3)   |
| C(26A)-C(27A)-H(27C) | 109.5    | N(2B)-N(1B)-Mn(1B)   | 130.2(8)   |
| H(27A)-C(27A)-H(27C) | 109.5    | N(3B)-N(2B)-N(1B)    | 176.6(8)   |

|                      |          |                      |          |
|----------------------|----------|----------------------|----------|
| P(2B)-T1-P(1B)       | 76.73(5) | C(11B)-C(12B)-H(12F) | 109.5    |
| P(2B)-T1-P(3B)       | 77.27(6) | H(12D)-C(12B)-H(12F) | 109.5    |
| P(1B)-T1-P(3B)       | 75.73(5) | H(12E)-C(12B)-H(12F) | 109.5    |
| C(2B)-C(1B)-C(6B)    | 114.4(4) | C(14B)-C(13B)-H(13D) | 109.5    |
| C(2B)-C(1B)-B(1B)    | 126.0(4) | C(14B)-C(13B)-H(13E) | 109.5    |
| C(6B)-C(1B)-B(1B)    | 119.5(3) | H(13D)-C(13B)-H(13E) | 109.5    |
| C(3B)-C(2B)-C(1B)    | 123.1(5) | C(14B)-C(13B)-H(13F) | 109.5    |
| C(3B)-C(2B)-H(2B)    | 118.4    | H(13D)-C(13B)-H(13F) | 109.5    |
| C(1B)-C(2B)-H(2B)    | 118.4    | H(13E)-C(13B)-H(13F) | 109.5    |
| C(2B)-C(3B)-C(4B)    | 119.6(4) | C(13B)-C(14B)-C(15B) | 111.5(4) |
| C(2B)-C(3B)-H(3B)    | 120.2    | C(13B)-C(14B)-P(1B)  | 112.7(3) |
| C(4B)-C(3B)-H(3B)    | 120.2    | C(15B)-C(14B)-P(1B)  | 119.5(3) |
| C(5B)-C(4B)-C(3B)    | 119.4(4) | C(13B)-C(14B)-H(14B) | 103.7    |
| C(5B)-C(4B)-H(4B)    | 120.3    | C(15B)-C(14B)-H(14B) | 103.7    |
| C(3B)-C(4B)-H(4B)    | 120.3    | P(1B)-C(14B)-H(14B)  | 103.7    |
| C(4B)-C(5B)-C(6B)    | 120.5(5) | C(14B)-C(15B)-H(15D) | 109.5    |
| C(4B)-C(5B)-H(5B)    | 119.8    | C(14B)-C(15B)-H(15E) | 109.5    |
| C(6B)-C(5B)-H(5B)    | 119.8    | H(15D)-C(15B)-H(15E) | 109.5    |
| C(5B)-C(6B)-C(1B)    | 122.9(4) | C(14B)-C(15B)-H(15F) | 109.5    |
| C(5B)-C(6B)-H(6B)    | 118.5    | H(15D)-C(15B)-H(15F) | 109.5    |
| C(1B)-C(6B)-H(6B)    | 118.5    | H(15E)-C(15B)-H(15F) | 109.5    |
| B(1B)-C(7B)-P(1B)    | 118.9(2) | C(17B)-C(16B)-H(16D) | 109.5    |
| B(1B)-C(7B)-H(7B1)   | 107.6    | C(17B)-C(16B)-H(16E) | 109.5    |
| P(1B)-C(7B)-H(7B1)   | 107.6    | H(16D)-C(16B)-H(16E) | 109.5    |
| B(1B)-C(7B)-H(7B2)   | 107.6    | C(17B)-C(16B)-H(16F) | 109.5    |
| P(1B)-C(7B)-H(7B2)   | 107.6    | H(16D)-C(16B)-H(16F) | 109.5    |
| H(7B1)-C(7B)-H(7B2)  | 107.0    | H(16E)-C(16B)-H(16F) | 109.5    |
| B(1B)-C(8B)-P(2B)    | 119.6(3) | C(18B)-C(17B)-C(16B) | 111.8(4) |
| B(1B)-C(8B)-H(8B1)   | 107.4    | C(18B)-C(17B)-P(2B)  | 115.7(3) |
| P(2B)-C(8B)-H(8B1)   | 107.4    | C(16B)-C(17B)-P(2B)  | 110.3(3) |
| B(1B)-C(8B)-H(8B2)   | 107.4    | C(18B)-C(17B)-H(17B) | 106.1    |
| P(2B)-C(8B)-H(8B2)   | 107.4    | C(16B)-C(17B)-H(17B) | 106.1    |
| H(8B1)-C(8B)-H(8B2)  | 106.9    | P(2B)-C(17B)-H(17B)  | 106.1    |
| B(1B)-C(9B)-P(3B)    | 120.9(3) | C(17B)-C(18B)-H(18D) | 109.5    |
| B(1B)-C(9B)-H(9B1)   | 107.1    | C(17B)-C(18B)-H(18E) | 109.5    |
| P(3B)-C(9B)-H(9B1)   | 107.1    | H(18D)-C(18B)-H(18E) | 109.5    |
| B(1B)-C(9B)-H(9B2)   | 107.1    | C(17B)-C(18B)-H(18F) | 109.5    |
| P(3B)-C(9B)-H(9B2)   | 107.1    | H(18D)-C(18B)-H(18F) | 109.5    |
| H(9B1)-C(9B)-H(9B2)  | 106.8    | H(18E)-C(18B)-H(18F) | 109.5    |
| C(11B)-C(10B)-H(10D) | 109.5    | C(20B)-C(19B)-H(19D) | 109.5    |
| C(11B)-C(10B)-H(10E) | 109.5    | C(20B)-C(19B)-H(19E) | 109.5    |
| H(10D)-C(10B)-H(10E) | 109.5    | H(19D)-C(19B)-H(19E) | 109.5    |
| C(11B)-C(10B)-H(10F) | 109.5    | C(20B)-C(19B)-H(19F) | 109.5    |
| H(10D)-C(10B)-H(10F) | 109.5    | H(19D)-C(19B)-H(19F) | 109.5    |
| H(10E)-C(10B)-H(10F) | 109.5    | H(19E)-C(19B)-H(19F) | 109.5    |
| C(12B)-C(11B)-C(10B) | 112.1(4) | C(19B)-C(20B)-C(21B) | 112.5(4) |
| C(12B)-C(11B)-P(1B)  | 115.9(3) | C(19B)-C(20B)-P(2B)  | 109.8(3) |
| C(10B)-C(11B)-P(1B)  | 113.9(3) | C(21B)-C(20B)-P(2B)  | 114.4(3) |
| C(12B)-C(11B)-H(11B) | 104.5    | C(19B)-C(20B)-H(20B) | 106.5    |
| C(10B)-C(11B)-H(11B) | 104.5    | C(21B)-C(20B)-H(20B) | 106.5    |
| P(1B)-C(11B)-H(11B)  | 104.5    | P(2B)-C(20B)-H(20B)  | 106.5    |
| C(11B)-C(12B)-H(12D) | 109.5    | C(20B)-C(21B)-H(21D) | 109.5    |
| C(11B)-C(12B)-H(12E) | 109.5    | C(20B)-C(21B)-H(21E) | 109.5    |
| H(12D)-C(12B)-H(12E) | 109.5    | H(21D)-C(21B)-H(21E) | 109.5    |

|                      |          |                      |          |
|----------------------|----------|----------------------|----------|
| C(20B)-C(21B)-H(21F) | 109.5    | P(3B)-C(23C)-H(23C)  | 102.3    |
| H(21D)-C(21B)-H(21F) | 109.5    | H(22F)-C(23C)-H(23C) | 64.8     |
| H(21E)-C(21B)-H(21F) | 109.5    | C(23C)-C(24B)-C(23B) | 28.0(3)  |
| C(23C)-C(22B)-C(23B) | 30.3(3)  | C(23C)-C(24B)-H(24D) | 83.1     |
| C(23C)-C(22B)-H(22D) | 114.8    | C(23B)-C(24B)-H(24D) | 109.3    |
| C(23B)-C(22B)-H(22D) | 108.4    | C(23C)-C(24B)-H(24E) | 129.1    |
| C(23C)-C(22B)-H(22E) | 126.9    | C(23B)-C(24B)-H(24E) | 108.8    |
| C(23B)-C(22B)-H(22E) | 107.6    | H(24D)-C(24B)-H(24E) | 109.7    |
| H(22D)-C(22B)-H(22E) | 108.7    | C(23C)-C(24B)-H(24F) | 110.9    |
| C(23C)-C(22B)-H(22F) | 80.9     | C(23B)-C(24B)-H(24F) | 109.3    |
| C(23B)-C(22B)-H(22F) | 110.2    | H(24D)-C(24B)-H(24F) | 109.7    |
| H(22D)-C(22B)-H(22F) | 111.6    | H(24E)-C(24B)-H(24F) | 110.2    |
| H(22E)-C(22B)-H(22F) | 110.2    | C(23C)-C(24B)-H(24G) | 109.6    |
| C(23C)-C(22B)-H(22G) | 107.4    | C(23B)-C(24B)-H(24G) | 129.9    |
| C(23B)-C(22B)-H(22G) | 77.9     | H(24D)-C(24B)-H(24G) | 64.0     |
| H(22D)-C(22B)-H(22G) | 89.1     | H(24E)-C(24B)-H(24G) | 120.4    |
| H(22E)-C(22B)-H(22G) | 43.7     | H(24F)-C(24B)-H(24G) | 46.1     |
| H(22F)-C(22B)-H(22G) | 152.6    | C(23C)-C(24B)-H(24H) | 108.8    |
| C(23C)-C(22B)-H(22H) | 110.5    | C(23B)-C(24B)-H(24H) | 110.5    |
| C(23B)-C(22B)-H(22H) | 127.9    | H(24D)-C(24B)-H(24H) | 65.3     |
| H(22D)-C(22B)-H(22H) | 123.0    | H(24E)-C(24B)-H(24H) | 46.6     |
| H(22E)-C(22B)-H(22H) | 65.1     | H(24F)-C(24B)-H(24H) | 139.0    |
| H(22F)-C(22B)-H(22H) | 45.3     | H(24G)-C(24B)-H(24H) | 109.8    |
| H(22G)-C(22B)-H(22H) | 108.6    | C(23C)-C(24B)-H(24I) | 108.7    |
| C(23C)-C(22B)-H(22I) | 110.3    | C(23B)-C(24B)-H(24I) | 82.5     |
| C(23B)-C(22B)-H(22I) | 115.0    | H(24D)-C(24B)-H(24I) | 168.2    |
| H(22D)-C(22B)-H(22I) | 19.7     | H(24E)-C(24B)-H(24I) | 63.6     |
| H(22E)-C(22B)-H(22I) | 120.5    | H(24F)-C(24B)-H(24I) | 66.3     |
| H(22F)-C(22B)-H(22I) | 92.1     | H(24G)-C(24B)-H(24I) | 110.0    |
| H(22G)-C(22B)-H(22I) | 108.5    | H(24H)-C(24B)-H(24I) | 109.8    |
| H(22H)-C(22B)-H(22I) | 111.4    | C(26B)-C(25B)-H(25D) | 109.5    |
| C(22B)-C(23B)-C(24B) | 110.1(5) | C(26B)-C(25B)-H(25E) | 109.5    |
| C(22B)-C(23B)-P(3B)  | 116.3(5) | H(25D)-C(25B)-H(25E) | 109.5    |
| C(24B)-C(23B)-P(3B)  | 113.4(4) | C(26B)-C(25B)-H(25F) | 109.5    |
| C(22B)-C(23B)-H(22G) | 37.9     | H(25D)-C(25B)-H(25F) | 109.5    |
| C(24B)-C(23B)-H(22G) | 134.0    | H(25E)-C(25B)-H(25F) | 109.5    |
| P(3B)-C(23B)-H(22G)  | 111.7    | C(27B)-C(26B)-C(25B) | 110.2(4) |
| C(22B)-C(23B)-H(23B) | 105.4    | C(27B)-C(26B)-P(3B)  | 116.9(4) |
| C(24B)-C(23B)-H(23B) | 105.4    | C(25B)-C(26B)-P(3B)  | 111.9(3) |
| P(3B)-C(23B)-H(23B)  | 105.2    | C(27B)-C(26B)-H(26B) | 105.6    |
| H(22G)-C(23B)-H(23B) | 70.7     | C(25B)-C(26B)-H(26B) | 105.6    |
| C(22B)-C(23C)-C(24B) | 119.7(6) | P(3B)-C(26B)-H(26B)  | 105.6    |
| C(22B)-C(23C)-P(3B)  | 112.4(6) | C(26B)-C(27B)-H(27D) | 109.5    |
| C(24B)-C(23C)-P(3B)  | 116.1(5) | C(26B)-C(27B)-H(27E) | 109.5    |
| C(22B)-C(23C)-H(22F) | 35.9     | H(27D)-C(27B)-H(27E) | 109.5    |
| C(24B)-C(23C)-H(22F) | 128.8    | C(26B)-C(27B)-H(27F) | 109.5    |
| P(3B)-C(23C)-H(22F)  | 115.0    | H(27D)-C(27B)-H(27F) | 109.5    |
| C(22B)-C(23C)-H(23C) | 100.6    | H(27E)-C(27B)-H(27F) | 109.5    |
| C(24B)-C(23C)-H(23C) | 101.8    |                      |          |

---

Symmetry transformations used to generate equivalent atoms:

**Table 16. Anisotropic displacement parameters ( $\text{\AA}^2 \times 10^4$ ) for  $[\text{PhBP}^{\text{iPr}}_3]\text{Mn}(\text{N}_3)$  (3). The anisotropic displacement factor exponent takes the form:  $-2\pi^2[\text{h}^2\text{a}^*{}^2\text{U}^{11} + \dots + 2\text{h k a}^* \text{b}^* \text{U}^{12}]$**

|        | $\text{U}^{11}$ | $\text{U}^{22}$ | $\text{U}^{33}$ | $\text{U}^{23}$ | $\text{U}^{13}$ | $\text{U}^{12}$ |
|--------|-----------------|-----------------|-----------------|-----------------|-----------------|-----------------|
| Mn(1A) | 280(3)          | 285(4)          | 235(4)          | -22(3)          | 32(3)           | -30(2)          |
| P(1A)  | 264(5)          | 333(7)          | 304(7)          | 47(6)           | -19(5)          | -49(5)          |
| P(2A)  | 254(6)          | 282(7)          | 256(7)          | 10(6)           | -16(5)          | 13(5)           |
| P(3A)  | 312(6)          | 446(8)          | 402(8)          | -203(6)         | 92(5)           | -92(5)          |
| B(1A)  | 240(20)         | 380(30)         | 340(30)         | -40(30)         | 10(20)          | -7(18)          |
| N(1A)  | 271(16)         | 247(16)         | 311(18)         | 44(13)          | 146(14)         | 39(12)          |
| N(2A)  | 397(18)         | 215(16)         | 700(30)         | -62(17)         | -19(17)         | -43(13)         |
| N(3A)  | 780(30)         | 530(20)         | 700(30)         | -157(19)        | 350(20)         | -173(19)        |
| C(1A)  | 310(20)         | 300(20)         | 270(30)         | 30(20)          | 79(19)          | -75(16)         |
| C(2A)  | 265(19)         | 410(30)         | 340(30)         | 90(30)          | -60(20)         | -93(18)         |
| C(3A)  | 280(20)         | 700(40)         | 380(30)         | 60(30)          | 10(20)          | -50(20)         |
| C(4A)  | 270(20)         | 480(30)         | 450(30)         | 30(20)          | 110(20)         | -52(19)         |
| C(5A)  | 430(30)         | 310(30)         | 950(40)         | 150(30)         | 220(30)         | -50(20)         |
| C(6A)  | 280(20)         | 530(30)         | 710(30)         | 130(30)         | 80(20)          | 60(20)          |
| C(7A)  | 290(20)         | 310(20)         | 310(30)         | 40(20)          | -63(17)         | -36(18)         |
| C(8A)  | 219(19)         | 250(20)         | 400(30)         | 20(20)          | 84(18)          | -7(16)          |
| C(9A)  | 340(20)         | 340(30)         | 310(30)         | 0(20)           | -40(18)         | -118(18)        |
| C(10A) | 700(30)         | 540(30)         | 390(30)         | 240(30)         | 140(20)         | -120(30)        |
| C(11A) | 460(30)         | 720(40)         | 560(30)         | 270(30)         | -180(20)        | -200(20)        |
| C(12A) | 690(40)         | 1510(70)        | 860(50)         | 870(50)         | 60(40)          | 370(40)         |
| C(13A) | 370(20)         | 520(30)         | 620(30)         | -80(30)         | -30(20)         | -20(20)         |
| C(14A) | 430(20)         | 320(30)         | 360(30)         | -130(20)        | 10(20)          | 0(20)           |
| C(15A) | 380(30)         | 630(40)         | 820(50)         | -90(30)         | 180(30)         | -10(20)         |
| C(16A) | 370(30)         | 760(40)         | 500(30)         | -390(30)        | 0(20)           | 20(30)          |
| C(17A) | 520(30)         | 1010(50)        | 350(30)         | -260(30)        | 130(20)         | -150(30)        |
| C(18A) | 660(30)         | 1120(50)        | 500(30)         | -590(30)        | 280(30)         | -340(30)        |
| C(19A) | 350(20)         | 330(30)         | 460(30)         | -10(20)         | -10(20)         | 90(20)          |
| C(20A) | 280(20)         | 400(30)         | 450(30)         | 40(20)          | -10(20)         | 90(20)          |
| C(21A) | 490(30)         | 380(30)         | 810(40)         | 190(30)         | -80(20)         | 80(20)          |
| C(22A) | 230(30)         | 430(30)         | 2840(100)       | -30(50)         | 200(40)         | 50(20)          |
| C(23A) | 520(30)         | 700(40)         | 1540(70)        | -670(40)        | -120(40)        | 0(20)           |
| C(24A) | 360(30)         | 480(30)         | 850(40)         | -240(30)        | 200(20)         | -40(20)         |
| C(25A) | 730(40)         | 1000(50)        | 530(40)         | -90(40)         | 240(30)         | -270(30)        |
| C(26A) | 650(30)         | 680(40)         | 220(30)         | -110(30)        | 70(20)          | -290(30)        |
| C(27A) | 980(40)         | 810(40)         | 340(30)         | -130(30)        | 60(30)          | -390(30)        |
| Mn(1B) | 231(4)          | 190(4)          | 280(5)          | -16(4)          | 12(4)           | 19(3)           |
| P(1B)  | 265(5)          | 215(5)          | 196(6)          | 19(5)           | 3(4)            | -2(4)           |
| P(2B)  | 260(5)          | 217(6)          | 253(7)          | -2(5)           | 25(5)           | -21(4)          |
| P(3B)  | 229(5)          | 301(6)          | 365(7)          | -111(5)         | -6(5)           | -4(4)           |
| B(1B)  | 280(20)         | 200(20)         | 220(30)         | 50(20)          | -10(20)         | 27(16)          |
| Tl     | 137(8)          | 237(8)          | 377(8)          | -9(6)           | 7(7)            | 67(6)           |
| C(1B)  | 280(20)         | 330(20)         | 260(30)         | -110(20)        | 4(18)           | -71(16)         |
| C(2B)  | 370(20)         | 450(30)         | 340(30)         | 130(30)         | 20(20)          | 70(20)          |
| C(3B)  | 260(20)         | 590(30)         | 490(30)         | 100(30)         | 160(20)         | 80(20)          |
| C(4B)  | 360(30)         | 520(30)         | 480(30)         | -130(30)        | -70(20)         | 200(20)         |
| C(5B)  | 390(20)         | 320(30)         | 680(30)         | -30(20)         | -210(20)        | 20(20)          |

|        |         |         |          |          |          |          |
|--------|---------|---------|----------|----------|----------|----------|
| C(6B)  | 330(20) | 200(20) | 710(30)  | 20(20)   | -140(20) | -3(17)   |
| C(7B)  | 197(17) | 340(20) | 230(20)  | -30(20)  | 3(15)    | 4(17)    |
| C(8B)  | 290(20) | 280(20) | 160(20)  | 50(20)   | 21(16)   | -82(17)  |
| C(9B)  | 272(19) | 300(20) | 260(20)  | -10(20)  | -47(17)  | 18(16)   |
| C(10B) | 430(30) | 600(30) | 510(30)  | 190(30)  | -40(20)  | -30(20)  |
| C(11B) | 350(20) | 360(20) | 240(20)  | 100(20)  | -42(18)  | -44(18)  |
| C(12B) | 460(30) | 500(30) | 470(30)  | 170(30)  | -40(20)  | -80(20)  |
| C(13B) | 430(20) | 290(20) | 390(20)  | -130(20) | -28(19)  | 60(20)   |
| C(14B) | 210(20) | 420(30) | 430(30)  | 40(20)   | -42(18)  | -14(18)  |
| C(15B) | 490(30) | 300(30) | 370(30)  | -170(20) | -30(20)  | -40(20)  |
| C(16B) | 300(20) | 700(40) | 560(30)  | -300(30) | 70(20)   | 60(20)   |
| C(17B) | 430(20) | 370(30) | 300(30)  | -90(20)  | 150(20)  | -160(20) |
| C(18B) | 510(20) | 310(20) | 400(30)  | 80(20)   | 30(20)   | -70(20)  |
| C(19B) | 230(20) | 320(30) | 610(40)  | -40(30)  | 140(20)  | -13(18)  |
| C(20B) | 260(20) | 190(20) | 620(30)  | 150(20)  | -50(20)  | -16(19)  |
| C(21B) | 420(30) | 470(30) | 1030(40) | 470(30)  | -350(30) | -190(20) |
| C(22B) | 410(30) | 420(30) | 1600(60) | 70(40)   | 70(30)   | 130(20)  |
| C(24B) | 380(20) | 340(20) | 500(30)  | -70(20)  | -90(20)  | 67(18)   |
| C(25B) | 390(30) | 920(40) | 340(30)  | -110(30) | -90(20)  | 240(30)  |
| C(26B) | 300(20) | 420(30) | 460(30)  | -130(20) | -90(20)  | 30(18)   |
| C(27B) | 620(30) | 870(40) | 390(30)  | -200(30) | 50(30)   | 240(30)  |

---

**Table 17. Crystal Data and Structure Analysis Details for [PhBP<sup>i</sup>Pr<sub>3</sub>]Mn(CH<sub>2</sub>Ph) (4).**

|                         |                                                   |
|-------------------------|---------------------------------------------------|
| Empirical formula       | C <sub>34</sub> H <sub>60</sub> BMnP <sub>3</sub> |
| Formula weight          | 627.48                                            |
| Crystallization solvent | cyclopentane                                      |
| Crystal shape           | block                                             |
| Crystal color           | yellow                                            |
| Crystal size            | 0.26 x 0.37 x 0.44 mm                             |

**Data Collection**

|                                                                 |                                                        |                                       |
|-----------------------------------------------------------------|--------------------------------------------------------|---------------------------------------|
| Preliminary photograph(s)                                       | rotation                                               |                                       |
| Type of diffractometer                                          | Bruker SMART 1000                                      |                                       |
| Wavelength                                                      | 0.71073 Å MoKα                                         |                                       |
| Data collection temperature                                     | 100 K                                                  |                                       |
| Theta range for 23623 reflections used in lattice determination | 2.13 to 32.75°                                         |                                       |
| Unit cell dimensions                                            | a = 9.4120(6) Å<br>b = 11.8746(8) Å<br>c = 16.736(1) Å | α = 90°<br>β = 105.605(1)°<br>γ = 90° |
| Volume                                                          | 1801.6(2) Å <sup>3</sup>                               |                                       |
| Z                                                               | 2                                                      |                                       |
| Crystal system                                                  | monoclinic                                             |                                       |
| Space group                                                     | P 21 (# 4)                                             |                                       |
| Density (calculated)                                            | 1.157 g/cm <sup>3</sup>                                |                                       |
| F(000)                                                          | 678                                                    |                                       |
| Theta range for data collection                                 | 2.1 to 32.9°                                           |                                       |
| Completeness to theta = 32.90°                                  | 91.0%                                                  |                                       |
| Index ranges                                                    | -14 ≤ h ≤ 12, -17 ≤ k ≤ 18, -24 ≤ l ≤ 24               |                                       |
| Data collection scan type                                       | ω scans                                                |                                       |
| Reflections collected                                           | 30165                                                  |                                       |
| Independent reflections                                         | 10967 [R <sub>int</sub> = 0.0446]                      |                                       |
| Reflections > 2σ(I)                                             | 9835                                                   |                                       |
| Average σ(I)/(net I)                                            | 0.0459                                                 |                                       |
| Absorption coefficient                                          | 0.52 mm <sup>-1</sup>                                  |                                       |
| Absorption correction                                           | none                                                   |                                       |
| Reflections monitored for decay                                 | initial data recollected at end                        |                                       |
| Decay of standards                                              | 0%                                                     |                                       |



**Table 17 (cont.)****Structure Solution and Refinement**

|                                                        |                                                                              |
|--------------------------------------------------------|------------------------------------------------------------------------------|
| Primary solution method                                | direct methods                                                               |
| Secondary solution method                              | difference map                                                               |
| Hydrogen placement                                     | calculated                                                                   |
| Refinement method                                      | Full-matrix least-squares on $F^2$                                           |
| Data / restraints / parameters                         | 10967 / 1 / 365                                                              |
| Treatment of hydrogen atoms                            | not refined, $U_{\text{iso}}$ fixed at 120% $U_{\text{eq}}$ of attached atom |
| Goodness-of-fit on $F^2$                               | 1.53                                                                         |
| Final R indices [ $I > 2\sigma(I)$ , 9835 reflections] | $R1 = 0.0328$ , $wR2 = 0.0570$                                               |
| R indices (all data)                                   | $R1 = 0.0394$ , $wR2 = 0.0578$                                               |
| Type of weighting scheme used                          | sigma                                                                        |
| Weighting scheme used                                  | calc $w=1/[\sigma^2(F_o^2)]$ where $P=(F_o^2+2F_c^2)/3$                      |
| Max shift/error                                        | 0.001                                                                        |
| Average shift/error                                    | 0.000                                                                        |
| Absolute structure parameter                           | 0.048(8)                                                                     |
| Largest diff. peak and hole                            | 1.00 and $-0.32 \text{ e} \cdot \text{\AA}^{-3}$                             |

**Programs Used**

|                      |                     |
|----------------------|---------------------|
| Cell refinement      | Bruker SMART 5.606  |
| Data collection      | Bruker SMART 5.054  |
| Data reduction       | Bruker SAINT 6.45   |
| Structure solution   | Bruker SHELXTL 6.14 |
| Structure refinement | Bruker SHELXTL 6.14 |

**Special Refinement Details**

A twin card was used in the refinement with a BASF value of 0.04845.

Refinement of  $F^2$  against ALL reflections. The weighted R-factor ( $wR$ ) and goodness of fit ( $S$ ) are based on  $F^2$ , conventional R-factors ( $R$ ) are based on  $F$ , with  $F$  set to zero for negative  $F^2$ . The threshold expression of  $F^2 > 2\sigma(F^2)$  is used only for calculating R-factors(gt) etc. and is not relevant to the choice of reflections for refinement. R-factors based on  $F^2$  are statistically about twice as large as those based on  $F$ , and R-factors based on ALL data will be even larger.

All esds (except the esd in the dihedral angle between two l.s. planes) are estimated using the full covariance matrix. The cell esds are taken into account individually in the estimation of esds in distances, angles and torsion angles; correlations between esds in cell parameters are only used when they are defined by crystal symmetry. An approximate (isotropic) treatment of cell esds is used for estimating esds involving l.s. planes.

**Table 18. Atomic coordinates ( $\times 10^4$ ) and equivalent isotropic displacement parameters ( $\text{\AA}^2 \times 10^3$ ) for  $[\text{PhBP}^{i\text{Pr}}_3]\text{Mn}(\text{CH}_2\text{Ph})$  (4).  $U(\text{eq})$  is defined as one third of the trace of the orthogonalized  $U_{ij}$  tensor.**

|       | x           | y           | z           | $U_{\text{eq}}$ |
|-------|-------------|-------------|-------------|-----------------|
| Mn    | 9078.8(2)   | 94.2(2)     | 6964.4(1)   | 15.9(1)         |
| P(1)  | 9741.6(4)   | -741.3(3)   | 8433.6(2)   | 15.6(1)         |
| P(2)  | 8961.1(4)   | 2077.1(3)   | 7529.1(2)   | 14.7(1)         |
| P(3)  | 6333.2(4)   | -161.4(3)   | 6863.6(2)   | 15.7(1)         |
| B     | 7336.6(19)  | 824.2(13)   | 8599.3(10)  | 14.1(3)         |
| C(1)  | 6509.9(16)  | 1229.5(12)  | 9301.8(9)   | 14.6(3)         |
| C(2)  | 6594.5(17)  | 662.5(14)   | 10047.8(9)  | 20.0(3)         |
| C(3)  | 5841.4(19)  | 1021.9(15)  | 10615.6(10) | 26.1(4)         |
| C(4)  | 4954.3(17)  | 1968.3(15)  | 10452.2(10) | 24.3(4)         |
| C(5)  | 4843.7(17)  | 2549.4(13)  | 9725.4(10)  | 22.0(4)         |
| C(6)  | 5601.9(16)  | 2188.8(13)  | 9170.0(9)   | 18.0(3)         |
| C(7)  | 8317.9(16)  | -336.6(12)  | 8935.7(9)   | 14.7(3)         |
| C(8)  | 8418.5(16)  | 1915.1(12)  | 8493.9(9)   | 15.1(3)         |
| C(9)  | 5957.3(16)  | 573.3(13)   | 7745.6(9)   | 15.8(3)         |
| C(10) | 10381(2)    | -2818.8(16) | 7818.7(11)  | 35.7(5)         |
| C(11) | 10195.4(19) | -2278.6(13) | 8606.4(10)  | 24.1(4)         |
| C(12) | 9191(2)     | -2945.7(15) | 8994.5(12)  | 35.1(4)         |
| C(13) | 12752.9(17) | -346.6(14)  | 8690.5(10)  | 23.6(4)         |
| C(14) | 11471.3(15) | -97.1(13)   | 9073.9(9)   | 18.1(3)         |
| C(15) | 11888.8(18) | -430.0(14)  | 9988.7(9)   | 24.3(4)         |
| C(16) | 11993.0(18) | 2408.9(14)  | 7734.3(11)  | 25.7(4)         |
| C(17) | 10576.6(17) | 3046.8(13)  | 7706.2(10)  | 19.3(3)         |
| C(18) | 10799(2)    | 3802.0(15)  | 8467.3(11)  | 30.0(4)         |
| C(19) | 7708(2)     | 3002.2(15)  | 5965.2(9)   | 26.5(4)         |
| C(20) | 7470.1(17)  | 2918.8(13)  | 6836.4(9)   | 19.9(3)         |
| C(21) | 7204(2)     | 4083.6(15)  | 7156.6(11)  | 33.6(4)         |
| C(22) | 5404.4(18)  | 106.6(17)   | 5139.4(9)   | 27.8(3)         |
| C(23) | 4805.5(16)  | 120.7(15)   | 5903.6(8)   | 19.2(3)         |
| C(24) | 3931.0(19)  | 1202.1(15)  | 5912.3(10)  | 27.4(4)         |
| C(25) | 6308(2)     | -2403.6(14) | 6341.8(11)  | 30.3(4)         |
| C(26) | 6066.8(18)  | -1682.0(13) | 7051.3(10)  | 21.4(3)         |
| C(27) | 4611(2)     | -1986.2(15) | 7237.4(12)  | 32.8(4)         |
| C(28) | 10347.2(19) | -430.2(15)  | 6145.9(10)  | 27.9(4)         |
| C(29) | 9533.5(18)  | -249.3(13)  | 5264.4(10)  | 22.7(3)         |
| C(30) | 9524(2)     | 795.3(14)   | 4879.1(11)  | 29.9(4)         |
| C(31) | 8712(2)     | 979.9(17)   | 4067.4(13)  | 39.3(5)         |
| C(32) | 7868(2)     | 138(2)      | 3615.0(11)  | 39.9(5)         |
| C(33) | 7857(2)     | -905.9(17)  | 3979.4(11)  | 36.2(5)         |
| C(34) | 8675(2)     | -1094.5(14) | 4784.8(11)  | 27.9(4)         |

**Table 9. Bond lengths [ $\text{\AA}$ ] and angles [ $^\circ$ ] for  $[\text{PhBP}^{\text{iPr}}_3]\text{Mn}(\text{CH}_2\text{Ph})$  (4).**

|              |            |              |          |
|--------------|------------|--------------|----------|
| Mn-C(28)     | 2.138(2)   | C(15)-H(15C) | 0.9800   |
| Mn-P(2)      | 2.5507(5)  | C(16)-C(17)  | 1.523(2) |
| Mn-P(3)      | 2.5620(5)  | C(16)-H(16A) | 0.9800   |
| Mn-P(1)      | 2.5679(4)  | C(16)-H(16B) | 0.9800   |
| P(1)-C(7)    | 1.8273(14) | C(16)-H(16C) | 0.9800   |
| P(1)-C(14)   | 1.8561(15) | C(17)-C(18)  | 1.525(2) |
| P(1)-C(11)   | 1.8793(15) | C(17)-H(17)  | 1.0000   |
| P(2)-C(8)    | 1.8300(14) | C(18)-H(18A) | 0.9800   |
| P(2)-C(20)   | 1.8539(15) | C(18)-H(18B) | 0.9800   |
| P(2)-C(17)   | 1.8663(16) | C(18)-H(18C) | 0.9800   |
| P(3)-C(9)    | 1.8293(14) | C(19)-C(20)  | 1.537(2) |
| P(3)-C(26)   | 1.8613(16) | C(19)-H(19A) | 0.9800   |
| P(3)-C(23)   | 1.8756(14) | C(19)-H(19B) | 0.9800   |
| B-C(1)       | 1.647(2)   | C(19)-H(19C) | 0.9800   |
| B-C(7)       | 1.670(2)   | C(20)-C(21)  | 1.528(2) |
| B-C(9)       | 1.679(2)   | C(20)-H(20)  | 1.0000   |
| B-C(8)       | 1.686(2)   | C(21)-H(21A) | 0.9800   |
| C(1)-C(2)    | 1.402(2)   | C(21)-H(21B) | 0.9800   |
| C(1)-C(6)    | 1.405(2)   | C(21)-H(21C) | 0.9800   |
| C(2)-C(3)    | 1.396(2)   | C(22)-C(23)  | 1.530(2) |
| C(2)-H(2)    | 0.9500     | C(22)-H(22A) | 0.9800   |
| C(3)-C(4)    | 1.383(2)   | C(22)-H(22B) | 0.9800   |
| C(3)-H(3)    | 0.9500     | C(22)-H(22C) | 0.9800   |
| C(4)-C(5)    | 1.378(2)   | C(23)-C(24)  | 1.527(2) |
| C(4)-H(4)    | 0.9500     | C(23)-H(23)  | 1.0000   |
| C(5)-C(6)    | 1.383(2)   | C(24)-H(24A) | 0.9800   |
| C(5)-H(5)    | 0.9500     | C(24)-H(24B) | 0.9800   |
| C(6)-H(6)    | 0.9500     | C(24)-H(24C) | 0.9800   |
| C(7)-H(7A)   | 0.9900     | C(25)-C(26)  | 1.530(2) |
| C(7)-H(7B)   | 0.9900     | C(25)-H(25A) | 0.9800   |
| C(8)-H(8A)   | 0.9900     | C(25)-H(25B) | 0.9800   |
| C(8)-H(8B)   | 0.9900     | C(25)-H(25C) | 0.9800   |
| C(9)-H(9A)   | 0.9900     | C(26)-C(27)  | 1.528(2) |
| C(9)-H(9B)   | 0.9900     | C(26)-H(26)  | 1.0000   |
| C(10)-C(11)  | 1.518(2)   | C(27)-H(27A) | 0.9800   |
| C(10)-H(10A) | 0.9800     | C(27)-H(27B) | 0.9800   |
| C(10)-H(10B) | 0.9800     | C(27)-H(27C) | 0.9800   |
| C(10)-H(10C) | 0.9800     | C(28)-C(29)  | 1.484(2) |
| C(11)-C(12)  | 1.508(2)   | C(28)-H(28A) | 0.9900   |
| C(11)-H(11)  | 1.0000     | C(28)-H(28B) | 0.9900   |
| C(12)-H(12A) | 0.9800     | C(29)-C(30)  | 1.397(2) |
| C(12)-H(12B) | 0.9800     | C(29)-C(34)  | 1.399(2) |
| C(12)-H(12C) | 0.9800     | C(30)-C(31)  | 1.385(3) |
| C(13)-C(14)  | 1.540(2)   | C(30)-H(30)  | 0.9500   |
| C(13)-H(13A) | 0.9800     | C(31)-C(32)  | 1.372(3) |
| C(13)-H(13B) | 0.9800     | C(31)-H(31)  | 0.9500   |
| C(13)-H(13C) | 0.9800     | C(32)-C(33)  | 1.383(3) |
| C(14)-C(15)  | 1.527(2)   | C(32)-H(32)  | 0.9500   |
| C(14)-H(14)  | 1.0000     | C(33)-C(34)  | 1.379(3) |
| C(15)-H(15A) | 0.9800     | C(33)-H(33)  | 0.9500   |
| C(15)-H(15B) | 0.9800     | C(34)-H(34)  | 0.9500   |

|                  |            |                     |            |
|------------------|------------|---------------------|------------|
| C(28)-Mn-P(2)    | 126.42(5)  | H(7A)-C(7)-H(7B)    | 107.1      |
| C(28)-Mn-P(3)    | 130.59(5)  | B-C(8)-P(2)         | 119.53(10) |
| P(2)-Mn-P(3)     | 89.439(14) | B-C(8)-H(8A)        | 107.4      |
| C(28)-Mn-P(1)    | 117.86(5)  | P(2)-C(8)-H(8A)     | 107.4      |
| P(2)-Mn-P(1)     | 91.458(14) | B-C(8)-H(8B)        | 107.4      |
| P(3)-Mn-P(1)     | 89.899(14) | P(2)-C(8)-H(8B)     | 107.4      |
| C(7)-P(1)-C(14)  | 105.30(7)  | H(8A)-C(8)-H(8B)    | 107.0      |
| C(7)-P(1)-C(11)  | 110.43(7)  | B-C(9)-P(3)         | 119.89(10) |
| C(14)-P(1)-C(11) | 100.59(8)  | B-C(9)-H(9A)        | 107.3      |
| C(7)-P(1)-Mn     | 108.63(5)  | P(3)-C(9)-H(9A)     | 107.3      |
| C(14)-P(1)-Mn    | 110.06(5)  | B-C(9)-H(9B)        | 107.3      |
| C(11)-P(1)-Mn    | 120.61(5)  | P(3)-C(9)-H(9B)     | 107.3      |
| C(8)-P(2)-C(20)  | 105.34(7)  | H(9A)-C(9)-H(9B)    | 106.9      |
| C(8)-P(2)-C(17)  | 109.48(7)  | C(11)-C(10)-H(10A)  | 109.5      |
| C(20)-P(2)-C(17) | 102.36(7)  | C(11)-C(10)-H(10B)  | 109.5      |
| C(8)-P(2)-Mn     | 106.27(5)  | H(10A)-C(10)-H(10B) | 109.5      |
| C(20)-P(2)-Mn    | 111.53(5)  | C(11)-C(10)-H(10C)  | 109.5      |
| C(17)-P(2)-Mn    | 120.91(5)  | H(10A)-C(10)-H(10C) | 109.5      |
| C(9)-P(3)-C(26)  | 105.21(7)  | H(10B)-C(10)-H(10C) | 109.5      |
| C(9)-P(3)-C(23)  | 109.63(7)  | C(12)-C(11)-C(10)   | 112.58(15) |
| C(26)-P(3)-C(23) | 102.17(7)  | C(12)-C(11)-P(1)    | 115.71(12) |
| C(9)-P(3)-Mn     | 107.51(5)  | C(10)-C(11)-P(1)    | 110.57(11) |
| C(26)-P(3)-Mn    | 106.44(5)  | C(12)-C(11)-H(11)   | 105.7      |
| C(23)-P(3)-Mn    | 124.23(5)  | C(10)-C(11)-H(11)   | 105.7      |
| C(1)-B-C(7)      | 108.97(12) | P(1)-C(11)-H(11)    | 105.7      |
| C(1)-B-C(9)      | 104.70(11) | C(11)-C(12)-H(12A)  | 109.5      |
| C(7)-B-C(9)      | 111.80(12) | C(11)-C(12)-H(12B)  | 109.5      |
| C(1)-B-C(8)      | 105.35(11) | H(12A)-C(12)-H(12B) | 109.5      |
| C(7)-B-C(8)      | 112.00(12) | C(11)-C(12)-H(12C)  | 109.5      |
| C(9)-B-C(8)      | 113.45(12) | H(12A)-C(12)-H(12C) | 109.5      |
| C(2)-C(1)-C(6)   | 114.55(14) | H(12B)-C(12)-H(12C) | 109.5      |
| C(2)-C(1)-B      | 124.82(13) | C(14)-C(13)-H(13A)  | 109.5      |
| C(6)-C(1)-B      | 120.60(13) | C(14)-C(13)-H(13B)  | 109.5      |
| C(3)-C(2)-C(1)   | 122.80(15) | H(13A)-C(13)-H(13B) | 109.5      |
| C(3)-C(2)-H(2)   | 118.6      | C(14)-C(13)-H(13C)  | 109.5      |
| C(1)-C(2)-H(2)   | 118.6      | H(13A)-C(13)-H(13C) | 109.5      |
| C(4)-C(3)-C(2)   | 120.25(16) | H(13B)-C(13)-H(13C) | 109.5      |
| C(4)-C(3)-H(3)   | 119.9      | C(15)-C(14)-C(13)   | 110.42(12) |
| C(2)-C(3)-H(3)   | 119.9      | C(15)-C(14)-P(1)    | 114.92(11) |
| C(5)-C(4)-C(3)   | 118.68(14) | C(13)-C(14)-P(1)    | 110.11(10) |
| C(5)-C(4)-H(4)   | 120.7      | C(15)-C(14)-H(14)   | 107.0      |
| C(3)-C(4)-H(4)   | 120.7      | C(13)-C(14)-H(14)   | 107.0      |
| C(4)-C(5)-C(6)   | 120.54(15) | P(1)-C(14)-H(14)    | 107.0      |
| C(4)-C(5)-H(5)   | 119.7      | C(14)-C(15)-H(15A)  | 109.5      |
| C(6)-C(5)-H(5)   | 119.7      | C(14)-C(15)-H(15B)  | 109.5      |
| C(5)-C(6)-C(1)   | 123.18(15) | H(15A)-C(15)-H(15B) | 109.5      |
| C(5)-C(6)-H(6)   | 118.4      | C(14)-C(15)-H(15C)  | 109.5      |
| C(1)-C(6)-H(6)   | 118.4      | H(15A)-C(15)-H(15C) | 109.5      |
| B-C(7)-P(1)      | 117.99(10) | H(15B)-C(15)-H(15C) | 109.5      |
| B-C(7)-H(7A)     | 107.8      | C(17)-C(16)-H(16A)  | 109.5      |
| P(1)-C(7)-H(7A)  | 107.8      | C(17)-C(16)-H(16B)  | 109.5      |
| B-C(7)-H(7B)     | 107.8      | H(16A)-C(16)-H(16B) | 109.5      |
| P(1)-C(7)-H(7B)  | 107.8      | C(17)-C(16)-H(16C)  | 109.5      |
|                  |            | H(16A)-C(16)-H(16C) | 109.5      |

|                     |            |                     |            |
|---------------------|------------|---------------------|------------|
| H(16B)-C(16)-H(16C) | 109.5      | C(23)-C(24)-H(24C)  | 109.5      |
| C(16)-C(17)-C(18)   | 110.14(14) | H(24A)-C(24)-H(24C) | 109.5      |
| C(16)-C(17)-P(2)    | 111.53(11) | H(24B)-C(24)-H(24C) | 109.5      |
| C(18)-C(17)-P(2)    | 114.72(11) | C(26)-C(25)-H(25A)  | 109.5      |
| C(16)-C(17)-H(17)   | 106.6      | C(26)-C(25)-H(25B)  | 109.5      |
| C(18)-C(17)-H(17)   | 106.6      | H(25A)-C(25)-H(25B) | 109.5      |
| P(2)-C(17)-H(17)    | 106.6      | C(26)-C(25)-H(25C)  | 109.5      |
| C(17)-C(18)-H(18A)  | 109.5      | H(25A)-C(25)-H(25C) | 109.5      |
| C(17)-C(18)-H(18B)  | 109.5      | H(25B)-C(25)-H(25C) | 109.5      |
| H(18A)-C(18)-H(18B) | 109.5      | C(27)-C(26)-C(25)   | 110.75(14) |
| C(17)-C(18)-H(18C)  | 109.5      | C(27)-C(26)-P(3)    | 115.64(12) |
| H(18A)-C(18)-H(18C) | 109.5      | C(25)-C(26)-P(3)    | 110.94(11) |
| H(18B)-C(18)-H(18C) | 109.5      | C(27)-C(26)-H(26)   | 106.3      |
| C(20)-C(19)-H(19A)  | 109.5      | C(25)-C(26)-H(26)   | 106.3      |
| C(20)-C(19)-H(19B)  | 109.5      | P(3)-C(26)-H(26)    | 106.3      |
| H(19A)-C(19)-H(19B) | 109.5      | C(26)-C(27)-H(27A)  | 109.5      |
| C(20)-C(19)-H(19C)  | 109.5      | C(26)-C(27)-H(27B)  | 109.5      |
| H(19A)-C(19)-H(19C) | 109.5      | H(27A)-C(27)-H(27B) | 109.5      |
| H(19B)-C(19)-H(19C) | 109.5      | C(26)-C(27)-H(27C)  | 109.5      |
| C(21)-C(20)-C(19)   | 110.72(13) | H(27A)-C(27)-H(27C) | 109.5      |
| C(21)-C(20)-P(2)    | 115.88(12) | H(27B)-C(27)-H(27C) | 109.5      |
| C(19)-C(20)-P(2)    | 110.44(11) | C(29)-C(28)-Mn      | 111.54(11) |
| C(21)-C(20)-H(20)   | 106.4      | C(29)-C(28)-H(28A)  | 109.3      |
| C(19)-C(20)-H(20)   | 106.4      | Mn-C(28)-H(28A)     | 109.3      |
| P(2)-C(20)-H(20)    | 106.4      | C(29)-C(28)-H(28B)  | 109.3      |
| C(20)-C(21)-H(21A)  | 109.5      | Mn-C(28)-H(28B)     | 109.3      |
| C(20)-C(21)-H(21B)  | 109.5      | H(28A)-C(28)-H(28B) | 108.0      |
| H(21A)-C(21)-H(21B) | 109.5      | C(30)-C(29)-C(34)   | 116.19(15) |
| C(20)-C(21)-H(21C)  | 109.5      | C(30)-C(29)-C(28)   | 121.67(15) |
| H(21A)-C(21)-H(21C) | 109.5      | C(34)-C(29)-C(28)   | 122.06(15) |
| H(21B)-C(21)-H(21C) | 109.5      | C(31)-C(30)-C(29)   | 121.77(17) |
| C(23)-C(22)-H(22A)  | 109.5      | C(31)-C(30)-H(30)   | 119.1      |
| C(23)-C(22)-H(22B)  | 109.5      | C(29)-C(30)-H(30)   | 119.1      |
| H(22A)-C(22)-H(22B) | 109.5      | C(32)-C(31)-C(30)   | 120.72(17) |
| C(23)-C(22)-H(22C)  | 109.5      | C(32)-C(31)-H(31)   | 119.6      |
| H(22A)-C(22)-H(22C) | 109.5      | C(30)-C(31)-H(31)   | 119.6      |
| H(22B)-C(22)-H(22C) | 109.5      | C(31)-C(32)-C(33)   | 118.81(17) |
| C(24)-C(23)-C(22)   | 109.74(14) | C(31)-C(32)-H(32)   | 120.6      |
| C(24)-C(23)-P(3)    | 115.65(11) | C(33)-C(32)-H(32)   | 120.6      |
| C(22)-C(23)-P(3)    | 110.13(10) | C(34)-C(33)-C(32)   | 120.56(18) |
| C(24)-C(23)-H(23)   | 107.0      | C(34)-C(33)-H(33)   | 119.7      |
| C(22)-C(23)-H(23)   | 107.0      | C(32)-C(33)-H(33)   | 119.7      |
| P(3)-C(23)-H(23)    | 107.0      | C(33)-C(34)-C(29)   | 121.93(16) |
| C(23)-C(24)-H(24A)  | 109.5      | C(33)-C(34)-H(34)   | 119.0      |
| C(23)-C(24)-H(24B)  | 109.5      | C(29)-C(34)-H(34)   | 119.0      |
| H(24A)-C(24)-H(24B) | 109.5      |                     |            |

---

Symmetry transformations used to generate equivalent atoms:

**Table 20. Anisotropic displacement parameters ( $\text{\AA}^2 \times 10^4$ ) for  $[\text{PhBP}^{i\text{Pr}}_3]\text{Mn}(\text{CH}_2\text{Ph})$  (4). The anisotropic displacement factor exponent takes the form:  $-2\pi^2 [h^2 a^{*2} U^{11} + \dots + 2 h k a^* b^* U^{12}]$**

|       | $U^{11}$ | $U^{22}$ | $U^{33}$ | $U^{23}$ | $U^{13}$ | $U^{12}$ |
|-------|----------|----------|----------|----------|----------|----------|
| Mn    | 167(1)   | 173(1)   | 149(1)   | -4(1)    | 60(1)    | 10(1)    |
| P(1)  | 163(2)   | 150(2)   | 169(2)   | 16(2)    | 67(2)    | 29(2)    |
| P(2)  | 151(2)   | 151(2)   | 139(2)   | 6(2)     | 42(2)    | -9(2)    |
| P(3)  | 155(2)   | 179(2)   | 136(2)   | -25(2)   | 36(2)    | -13(1)   |
| B     | 135(8)   | 152(8)   | 149(8)   | -10(6)   | 59(7)    | 13(6)    |
| C(1)  | 116(7)   | 168(7)   | 148(7)   | -34(6)   | 23(6)    | -35(6)   |
| C(2)  | 174(8)   | 239(8)   | 186(8)   | 18(7)    | 48(6)    | 27(6)    |
| C(3)  | 252(9)   | 366(10)  | 190(8)   | 16(7)    | 100(7)   | 6(8)     |
| C(4)  | 191(8)   | 338(9)   | 234(8)   | -114(7)  | 113(7)   | -34(7)   |
| C(5)  | 151(8)   | 226(8)   | 284(9)   | -77(7)   | 58(7)    | 17(6)    |
| C(6)  | 161(8)   | 198(8)   | 181(7)   | -10(6)   | 46(6)    | -11(6)   |
| C(7)  | 141(7)   | 163(7)   | 151(7)   | 6(6)     | 63(6)    | 5(6)     |
| C(8)  | 145(7)   | 155(7)   | 153(7)   | 0(6)     | 41(6)    | -3(6)    |
| C(9)  | 156(8)   | 174(7)   | 154(7)   | -18(6)   | 61(6)    | 1(6)     |
| C(10) | 575(13)  | 212(9)   | 350(10)  | 4(8)     | 240(10)  | 87(9)    |
| C(11) | 312(10)  | 165(8)   | 274(9)   | 40(7)    | 124(8)   | 75(7)    |
| C(12) | 497(12)  | 181(8)   | 451(11)  | 120(8)   | 260(10)  | 96(8)    |
| C(13) | 175(8)   | 306(9)   | 247(8)   | 57(7)    | 90(7)    | 42(7)    |
| C(14) | 143(7)   | 200(8)   | 198(7)   | 35(6)    | 43(6)    | 36(6)    |
| C(15) | 190(8)   | 341(9)   | 193(8)   | 12(7)    | 43(6)    | 43(7)    |
| C(16) | 190(9)   | 301(9)   | 282(9)   | 54(7)    | 69(7)    | -15(7)   |
| C(17) | 188(8)   | 225(8)   | 167(8)   | 30(6)    | 48(6)    | -56(6)   |
| C(18) | 350(11)  | 273(9)   | 288(9)   | -61(7)   | 105(8)   | -141(8)  |
| C(19) | 328(10)  | 284(9)   | 172(8)   | 46(7)    | 48(7)    | 36(7)    |
| C(20) | 187(8)   | 213(8)   | 185(8)   | 39(6)    | 31(6)    | 24(6)    |
| C(21) | 453(12)  | 292(10)  | 250(9)   | 66(8)    | 73(8)    | 164(8)   |
| C(22) | 275(9)   | 384(9)   | 167(7)   | 7(8)     | 44(6)    | 27(9)    |
| C(23) | 180(7)   | 238(7)   | 137(6)   | -28(7)   | 10(5)    | -28(7)   |
| C(24) | 213(9)   | 367(10)  | 204(8)   | -22(7)   | -9(7)    | 61(7)    |
| C(25) | 421(11)  | 217(9)   | 287(10)  | -60(7)   | 124(9)   | -17(8)   |
| C(26) | 262(9)   | 172(8)   | 203(8)   | -23(6)   | 52(7)    | -33(6)   |
| C(27) | 364(11)  | 273(10)  | 386(11)  | -11(8)   | 167(9)   | -112(8)  |
| C(28) | 303(10)  | 319(10)  | 259(9)   | 22(7)    | 153(8)   | 86(7)    |
| C(29) | 277(9)   | 218(8)   | 251(8)   | -1(7)    | 182(7)   | 55(7)    |
| C(30) | 394(11)  | 236(9)   | 324(10)  | 1(7)     | 197(9)   | -44(8)   |
| C(31) | 583(14)  | 332(11)  | 329(11)  | 135(8)   | 233(10)  | 90(10)   |
| C(32) | 465(12)  | 539(12)  | 215(8)   | 46(10)   | 130(8)   | 100(11)  |
| C(33) | 422(12)  | 422(11)  | 299(10)  | -142(9)  | 199(9)   | -47(9)   |
| C(34) | 412(11)  | 206(8)   | 296(10)  | -17(7)   | 228(9)   | 19(7)    |

**Table 21. Crystal Data and Structure Analysis Details for [PhBP<sup>i</sup>Pr<sub>3</sub>]Mn(NH(2,6-<sup>i</sup>Pr<sub>2</sub>-C<sub>6</sub>H<sub>3</sub>)) (6).**

|                         |                                                    |
|-------------------------|----------------------------------------------------|
| Empirical formula       | C <sub>39</sub> H <sub>71</sub> BMnNP <sub>3</sub> |
| Formula weight          | 712.63                                             |
| Crystallization solvent | TMS <sub>2</sub> O/petroleum ether                 |
| Crystal shape           | rough slab                                         |
| Crystal color           | yellow                                             |
| Crystal size            | 0.11 x 0.26 x 0.37 mm                              |

### Data Collection

|                                                                 |                                                       |                                                                          |
|-----------------------------------------------------------------|-------------------------------------------------------|--------------------------------------------------------------------------|
| Preliminary photograph(s)                                       | rotation                                              |                                                                          |
| Type of diffractometer                                          | Bruker SMART 1000                                     |                                                                          |
| Wavelength                                                      | 0.71073 Å MoK $\alpha$                                |                                                                          |
| Data collection temperature                                     | 100 K                                                 |                                                                          |
| Theta range for 20417 reflections used in lattice determination | 2.53 to 27.96°                                        |                                                                          |
| Unit cell dimensions                                            | a = 10.690(1) Å<br>b = 11.249(1) Å<br>c = 18.718(2) Å | $\alpha$ = 98.393(2)°<br>$\beta$ = 101.614(2)°<br>$\gamma$ = 107.482(2)° |
| Volume                                                          | 2050.8(4) Å <sup>3</sup>                              |                                                                          |
| Z                                                               | 2                                                     |                                                                          |
| Crystal system                                                  | triclinic                                             |                                                                          |
| Space group                                                     | P-1 (# 2)                                             |                                                                          |
| Density (calculated)                                            | 1.154 g/cm <sup>3</sup>                               |                                                                          |
| F(000)                                                          | 774                                                   |                                                                          |
| Theta range for data collection                                 | 2.0 to 28.4°                                          |                                                                          |
| Completeness to theta = 28.40°                                  | 92.5%                                                 |                                                                          |
| Index ranges                                                    | -14 ≤ h ≤ 14, -15 ≤ k ≤ 14, -24 ≤ l ≤ 24              |                                                                          |
| Data collection scan type                                       | $\omega$ scans                                        |                                                                          |
| Reflections collected                                           | 42790                                                 |                                                                          |
| Independent reflections                                         | 9504 [R <sub>int</sub> = 0.0690]                      |                                                                          |
| Reflections > 2 $\sigma$ (I)                                    | 6761                                                  |                                                                          |
| Average $\sigma$ (I)/(net I)                                    | 0.0626                                                |                                                                          |
| Absorption coefficient                                          | 0.47 mm <sup>-1</sup>                                 |                                                                          |
| Absorption correction                                           | none                                                  |                                                                          |
| Reflections monitored for decay                                 | initial data recollected at end                       |                                                                          |
| Decay of standards                                              | 0%                                                    |                                                                          |

**Table 21 (cont.)****Structure Solution and Refinement**

|                                                        |                                                                              |
|--------------------------------------------------------|------------------------------------------------------------------------------|
| Primary solution method                                | direct methods                                                               |
| Secondary solution method                              | difference map                                                               |
| Hydrogen placement                                     | calculated                                                                   |
| Refinement method                                      | Full-matrix least-squares on $F^2$                                           |
| Data / restraints / parameters                         | 9504 / 0 / 458                                                               |
| Treatment of hydrogen atoms                            | not refined, $U_{\text{iso}}$ fixed at 120% $U_{\text{eq}}$ of attached atom |
| Goodness-of-fit on $F^2$                               | 1.50                                                                         |
| Final R indices [ $I > 2\sigma(I)$ , 6761 reflections] | $R1 = 0.0419$ , $wR2 = 0.0694$                                               |
| R indices (all data)                                   | $R1 = 0.0701$ , $wR2 = 0.0726$                                               |
| Type of weighting scheme used                          | sigma                                                                        |
| Weighting scheme used                                  | calc $w=1/[\sigma^2(F_o^2)]$ where $P=(F_o^2+2F_c^2)/3$                      |
| Max shift/error                                        | 0.008                                                                        |
| Average shift/error                                    | 0.000                                                                        |
| Largest diff. peak and hole                            | 0.74 and $-0.48 \text{ e} \cdot \text{\AA}^{-3}$                             |

**Programs Used**

|                      |                     |
|----------------------|---------------------|
| Cell refinement      | Bruker SMART 5.606  |
| Data collection      | Bruker SMART 5.054  |
| Data reduction       | Bruker SAINT 6.45   |
| Structure solution   | Bruker SHELXTL 6.14 |
| Structure refinement | Bruker SHELXTL 6.14 |

**Special Refinement Details**

One methyl group of the ligand was disordered and refined in two positions with populations of 52.0 and 48 %. One isopropyl unit of the aniline was also disordered and refined in two positions with populations of 86.2 and 13.8 %.

Refinement of  $F^2$  against ALL reflections. The weighted R-factor ( $wR$ ) and goodness of fit ( $S$ ) are based on  $F^2$ , conventional R-factors ( $R$ ) are based on  $F$ , with  $F$  set to zero for negative  $F^2$ . The threshold expression of  $F^2 > 2\sigma(F^2)$  is used only for calculating R-factors(gt) etc. and is not relevant to the choice of reflections for refinement. R-factors based on  $F^2$  are statistically about twice as large as those based on  $F$ , and R-factors based on ALL data will be even larger.

All esds (except the esd in the dihedral angle between two l.s. planes) are estimated using the full covariance matrix. The cell esds are taken into account individually in the estimation of esds in distances, angles and torsion angles; correlations between esds in cell parameters are only used when they are defined by crystal symmetry. An approximate (isotropic) treatment of cell esds is used for estimating esds involving l.s. planes.



**Table 22. Atomic coordinates ( $\times 10^4$ ) and equivalent isotropic displacement parameters ( $\text{\AA}^2 \times 10^3$ ) for  $[\text{PhBP}^{i\text{Pr}}_3]\text{Mn}(\text{NH}(2,6\text{-}^i\text{Pr}_2\text{-C}_6\text{H}_3))$  (6).  $U(\text{eq})$  is defined as one third of the trace of the orthogonalized  $U^{ij}$  tensor.**

|        | x           | y           | z          | $U_{\text{eq}}$ |
|--------|-------------|-------------|------------|-----------------|
| Mn     | -113.4(3)   | 8578.7(3)   | 2567.4(2)  | 17.9(1)         |
| P(1)   | -2241.7(5)  | 7635.6(4)   | 1443.9(3)  | 16.2(1)         |
| P(2)   | 803.2(5)    | 6892.9(4)   | 1991.4(3)  | 16.7(1)         |
| P(3)   | -1161.5(5)  | 7067.1(5)   | 3355.1(3)  | 19.7(1)         |
| B      | -2023(2)    | 5195.6(19)  | 1871.1(12) | 17.0(5)         |
| N      | 1518.0(17)  | 10118.9(15) | 3078.5(10) | 23.6(4)         |
| C(1)   | -2998.4(18) | 3686.9(17)  | 1557.5(10) | 16.6(4)         |
| C(2)   | -4254.2(19) | 3243.7(17)  | 1724.0(11) | 23.3(5)         |
| C(3)   | -5131(2)    | 1991.1(18)  | 1466.7(12) | 27.1(5)         |
| C(4)   | -4774(2)    | 1119.5(18)  | 1022.1(11) | 27.0(5)         |
| C(5)   | -3560(2)    | 1508.0(17)  | 840.7(11)  | 23.4(5)         |
| C(6)   | -2686.8(19) | 2772.3(16)  | 1108.5(10) | 18.5(4)         |
| C(7)   | -3018.2(17) | 6018.3(15)  | 1558.0(10) | 16.1(4)         |
| C(8)   | -658.0(17)  | 5442.6(16)  | 1537.2(10) | 16.8(4)         |
| C(9)   | -1593.7(19) | 5451.0(16)  | 2804.6(10) | 18.5(4)         |
| C(10)  | -3917.7(19) | 8705.3(18)  | 2079.8(11) | 24.2(5)         |
| C(11)  | -3596.4(18) | 8357.0(17)  | 1332.2(10) | 18.1(4)         |
| C(12)  | -4903.3(18) | 7554.8(18)  | 741.3(11)  | 23.7(5)         |
| C(13)  | -1657(2)    | 8676.4(18)  | 216.0(11)  | 26.4(5)         |
| C(14)  | -1862.8(19) | 7440.6(17)  | 511.1(10)  | 19.9(4)         |
| C(15)  | -2812(2)    | 6281.7(18)  | -97.6(11)  | 27.1(5)         |
| C(16)  | 1904(2)     | 8740.8(17)  | 1204.2(11) | 27.0(5)         |
| C(17)  | 1824.8(18)  | 7405.0(17)  | 1318.8(10) | 20.0(4)         |
| C(18)  | 1401.1(19)  | 6446.9(18)  | 571.7(11)  | 25.7(5)         |
| C(19)  | 3125.7(19)  | 7461.3(18)  | 3165.8(11) | 28.1(5)         |
| C(20)  | 1960.8(18)  | 6329.8(18)  | 2631.9(11) | 21.0(4)         |
| C(21)  | 2513.4(19)  | 5377.7(18)  | 2239.7(11) | 26.6(5)         |
| C(22)  | 732(2)      | 8563.2(19)  | 4693.2(12) | 34.9(6)         |
| C(23)  | -23(3)      | 7210(2)     | 4270.1(15) | 69.3(10)        |
| C(25)  | -2587(2)    | 8448.9(19)  | 4017.4(12) | 36.7(6)         |
| C(26)  | -2768(2)    | 7144.7(18)  | 3553.3(12) | 28.9(5)         |
| C(27)  | -3544(2)    | 6069(2)     | 3867.1(15) | 51.3(7)         |
| C(28)  | 1961.3(19)  | 11399.2(18) | 3426.4(11) | 21.5(5)         |
| C(29)  | 1052.0(19)  | 12094.9(18) | 3341.0(11) | 22.2(5)         |
| C(30)  | 1510(2)     | 13391.2(18) | 3679.7(12) | 31.6(5)         |
| C(31)  | 2835(2)     | 14025.2(19) | 4094.3(12) | 35.8(6)         |
| C(32)  | 3715(2)     | 13350.5(19) | 4184.5(12) | 34.8(6)         |
| C(33)  | 3325(2)     | 12054.1(19) | 3871.6(11) | 26.1(5)         |
| C(34)  | -271(2)     | 11431.7(19) | 2014.7(12) | 35.1(6)         |
| C(35)  | -355.5(19)  | 11465.0(18) | 2824.2(12) | 26.2(5)         |
| C(36)  | -1406(2)    | 12062.6(19) | 2988.6(13) | 36.9(6)         |
| C(38)  | 4328(2)     | 11344(2)    | 3980.7(14) | 35.6(6)         |
| C(24B) | 586(9)      | 6299(6)     | 4419(4)    | 25(2)           |
| C(24A) | -90(10)     | 6183(5)     | 4612(4)    | 45(2)           |
| C(37A) | 4893(3)     | 11154(3)    | 3335.1(15) | 39.9(8)         |
| C(39A) | 5477(3)     | 11922(3)    | 4713.9(15) | 45.2(9)         |

|        |          |           |          |       |
|--------|----------|-----------|----------|-------|
| C(37B) | 5870(14) | 12363(15) | 3843(9)  | 38(5) |
| C(39B) | 4438(17) | 10797(17) | 4453(10) | 43(5) |

---

**Table 23. Bond lengths [Å] and angles [°] for [PhBP<sup>*i*Pr</sup><sub>3</sub>]Mn(NH(2,6-*i*Pr<sub>2</sub>-C<sub>6</sub>H<sub>3</sub>)) (6).**

|              |            |              |          |
|--------------|------------|--------------|----------|
| Mn-N         | 1.997(2)   | C(14)-H(14)  | 1.0000   |
| Mn-P(3)      | 2.5637(6)  | C(15)-H(15A) | 0.9800   |
| Mn-P(2)      | 2.5813(6)  | C(15)-H(15B) | 0.9800   |
| Mn-P(1)      | 2.5877(6)  | C(15)-H(15C) | 0.9800   |
| P(1)-C(7)    | 1.8225(17) | C(16)-C(17)  | 1.528(2) |
| P(1)-C(11)   | 1.8528(18) | C(16)-H(16A) | 0.9800   |
| P(1)-C(14)   | 1.8674(19) | C(16)-H(16B) | 0.9800   |
| P(2)-C(8)    | 1.8313(17) | C(16)-H(16C) | 0.9800   |
| P(2)-C(20)   | 1.8616(19) | C(17)-C(18)  | 1.528(2) |
| P(2)-C(17)   | 1.8700(19) | C(17)-H(17)  | 1.0000   |
| P(3)-C(9)    | 1.8267(18) | C(18)-H(18A) | 0.9800   |
| P(3)-C(23)   | 1.845(2)   | C(18)-H(18B) | 0.9800   |
| P(3)-C(26)   | 1.852(2)   | C(18)-H(18C) | 0.9800   |
| B-C(1)       | 1.647(3)   | C(19)-C(20)  | 1.531(2) |
| B-C(8)       | 1.665(3)   | C(19)-H(19A) | 0.9800   |
| B-C(9)       | 1.673(3)   | C(19)-H(19B) | 0.9800   |
| B-C(7)       | 1.682(3)   | C(19)-H(19C) | 0.9800   |
| N-C(28)      | 1.384(2)   | C(20)-C(21)  | 1.536(2) |
| N-H(1)       | 0.826(18)  | C(20)-H(20)  | 1.0000   |
| C(1)-C(6)    | 1.393(2)   | C(21)-H(21A) | 0.9800   |
| C(1)-C(2)    | 1.400(2)   | C(21)-H(21B) | 0.9800   |
| C(2)-C(3)    | 1.386(2)   | C(21)-H(21C) | 0.9800   |
| C(2)-H(2)    | 0.9500     | C(22)-C(23)  | 1.499(3) |
| C(3)-C(4)    | 1.383(3)   | C(22)-H(22A) | 0.9800   |
| C(3)-H(3)    | 0.9500     | C(22)-H(22B) | 0.9800   |
| C(4)-C(5)    | 1.368(3)   | C(22)-H(22C) | 0.9800   |
| C(4)-H(4)    | 0.9500     | C(23)-C(24B) | 1.402(6) |
| C(5)-C(6)    | 1.397(2)   | C(23)-C(24A) | 1.390(5) |
| C(5)-H(5)    | 0.9500     | C(23)-H(23)  | 1.0454   |
| C(6)-H(6)    | 0.9500     | C(25)-C(26)  | 1.528(3) |
| C(7)-H(7A)   | 0.9900     | C(25)-H(25A) | 0.9800   |
| C(7)-H(7B)   | 0.9900     | C(25)-H(25B) | 0.9800   |
| C(8)-H(8A)   | 0.9900     | C(25)-H(25C) | 0.9800   |
| C(8)-H(8B)   | 0.9900     | C(26)-C(27)  | 1.516(3) |
| C(9)-H(9A)   | 0.9900     | C(26)-H(26)  | 1.0000   |
| C(9)-H(9B)   | 0.9900     | C(27)-H(27A) | 0.9800   |
| C(10)-C(11)  | 1.531(3)   | C(27)-H(27B) | 0.9800   |
| C(10)-H(10A) | 0.9800     | C(27)-H(27C) | 0.9800   |
| C(10)-H(10B) | 0.9800     | C(28)-C(29)  | 1.419(3) |
| C(10)-H(10C) | 0.9800     | C(28)-C(33)  | 1.431(3) |
| C(11)-C(12)  | 1.523(2)   | C(29)-C(30)  | 1.394(3) |
| C(11)-H(11)  | 1.0000     | C(29)-C(35)  | 1.508(3) |
| C(12)-H(12A) | 0.9800     | C(30)-C(31)  | 1.381(3) |
| C(12)-H(12B) | 0.9800     | C(30)-H(30)  | 0.9500   |
| C(12)-H(12C) | 0.9800     | C(31)-C(32)  | 1.375(3) |
| C(13)-C(14)  | 1.541(2)   | C(31)-H(31)  | 0.9500   |
| C(13)-H(13A) | 0.9800     | C(32)-C(33)  | 1.389(3) |
| C(13)-H(13B) | 0.9800     | C(32)-H(32)  | 0.9500   |
| C(13)-H(13C) | 0.9800     | C(33)-C(38)  | 1.517(3) |
| C(14)-C(15)  | 1.528(2)   | C(34)-C(35)  | 1.532(3) |

|                  |            |                     |            |
|------------------|------------|---------------------|------------|
| C(34)-H(34A)     | 0.9800     | C(9)-P(3)-Mn        | 105.88(6)  |
| C(34)-H(34B)     | 0.9800     | C(23)-P(3)-Mn       | 114.75(10) |
| C(34)-H(34C)     | 0.9800     | C(26)-P(3)-Mn       | 116.81(7)  |
| C(35)-C(36)      | 1.530(3)   | C(1)-B-C(8)         | 108.83(15) |
| C(35)-H(35)      | 1.0000     | C(1)-B-C(9)         | 106.66(15) |
| C(36)-H(36A)     | 0.9800     | C(8)-B-C(9)         | 111.20(15) |
| C(36)-H(36B)     | 0.9800     | C(1)-B-C(7)         | 104.31(14) |
| C(36)-H(36C)     | 0.9800     | C(8)-B-C(7)         | 113.10(15) |
| C(38)-C(39B)     | 1.155(19)  | C(9)-B-C(7)         | 112.25(15) |
| C(38)-C(37A)     | 1.472(3)   | C(28)-N-Mn          | 144.80(15) |
| C(38)-C(39A)     | 1.548(3)   | C(28)-N-H(1)        | 108.3(13)  |
| C(38)-C(37B)     | 1.795(14)  | Mn-N-H(1)           | 106.2(13)  |
| C(38)-H(38)      | 1.0000     | C(6)-C(1)-C(2)      | 114.97(16) |
| C(24B)-H(23)     | 1.2342     | C(6)-C(1)-B         | 124.70(16) |
| C(24B)-H(24F)    | 0.9800     | C(2)-C(1)-B         | 120.31(16) |
| C(24B)-H(24D)    | 0.9800     | C(3)-C(2)-C(1)      | 123.09(18) |
| C(24B)-H(24E)    | 0.9800     | C(3)-C(2)-H(2)      | 118.5      |
| C(24A)-H(24A)    | 0.9800     | C(1)-C(2)-H(2)      | 118.5      |
| C(24A)-H(24B)    | 0.9800     | C(4)-C(3)-C(2)      | 119.70(19) |
| C(24A)-H(24C)    | 0.9800     | C(4)-C(3)-H(3)      | 120.1      |
| C(37A)-H(37A)    | 0.9800     | C(2)-C(3)-H(3)      | 120.1      |
| C(37A)-H(37B)    | 0.9800     | C(5)-C(4)-C(3)      | 119.42(17) |
| C(37A)-H(37C)    | 0.9800     | C(5)-C(4)-H(4)      | 120.3      |
| C(39A)-H(39A)    | 0.9800     | C(3)-C(4)-H(4)      | 120.3      |
| C(39A)-H(39B)    | 0.9800     | C(4)-C(5)-C(6)      | 120.04(19) |
| C(39A)-H(39C)    | 0.9800     | C(4)-C(5)-H(5)      | 120.0      |
| C(37B)-H(37D)    | 0.9800     | C(6)-C(5)-H(5)      | 120.0      |
| C(37B)-H(37E)    | 0.9800     | C(1)-C(6)-C(5)      | 122.78(18) |
| C(37B)-H(37F)    | 0.9800     | C(1)-C(6)-H(6)      | 118.6      |
| C(39B)-H(39D)    | 0.9800     | C(5)-C(6)-H(6)      | 118.6      |
| C(39B)-H(39E)    | 0.9800     | B-C(7)-P(1)         | 119.57(12) |
| C(39B)-H(39F)    | 0.9800     | B-C(7)-H(7A)        | 107.4      |
|                  |            | P(1)-C(7)-H(7A)     | 107.4      |
| N-Mn-P(3)        | 118.63(5)  | B-C(7)-H(7B)        | 107.4      |
| N-Mn-P(2)        | 105.73(5)  | P(1)-C(7)-H(7B)     | 107.4      |
| P(3)-Mn-P(2)     | 89.95(2)   | H(7A)-C(7)-H(7B)    | 107.0      |
| N-Mn-P(1)        | 144.77(5)  | B-C(8)-P(2)         | 117.69(12) |
| P(3)-Mn-P(1)     | 93.11(2)   | B-C(8)-H(8A)        | 107.9      |
| P(2)-Mn-P(1)     | 87.96(2)   | P(2)-C(8)-H(8A)     | 107.9      |
| C(7)-P(1)-C(11)  | 106.54(8)  | B-C(8)-H(8B)        | 107.9      |
| C(7)-P(1)-C(14)  | 105.49(8)  | P(2)-C(8)-H(8B)     | 107.9      |
| C(11)-P(1)-C(14) | 104.83(8)  | H(8A)-C(8)-H(8B)    | 107.2      |
| C(7)-P(1)-Mn     | 103.27(6)  | B-C(9)-P(3)         | 118.97(12) |
| C(11)-P(1)-Mn    | 121.07(6)  | B-C(9)-H(9A)        | 107.6      |
| C(14)-P(1)-Mn    | 114.40(6)  | P(3)-C(9)-H(9A)     | 107.6      |
| C(8)-P(2)-C(20)  | 103.81(8)  | B-C(9)-H(9B)        | 107.6      |
| C(8)-P(2)-C(17)  | 110.64(8)  | P(3)-C(9)-H(9B)     | 107.6      |
| C(20)-P(2)-C(17) | 101.54(9)  | H(9A)-C(9)-H(9B)    | 107.0      |
| C(8)-P(2)-Mn     | 107.32(6)  | C(11)-C(10)-H(10A)  | 109.5      |
| C(20)-P(2)-Mn    | 118.28(6)  | C(11)-C(10)-H(10B)  | 109.5      |
| C(17)-P(2)-Mn    | 114.68(6)  | H(10A)-C(10)-H(10B) | 109.5      |
| C(9)-P(3)-C(23)  | 108.02(10) | C(11)-C(10)-H(10C)  | 109.5      |
| C(9)-P(3)-C(26)  | 105.14(9)  | H(10A)-C(10)-H(10C) | 109.5      |
| C(23)-P(3)-C(26) | 105.59(13) | H(10B)-C(10)-H(10C) | 109.5      |

|                     |            |                     |            |
|---------------------|------------|---------------------|------------|
| C(12)-C(11)-C(10)   | 109.69(15) | C(19)-C(20)-C(21)   | 110.63(15) |
| C(12)-C(11)-P(1)    | 115.00(13) | C(19)-C(20)-P(2)    | 110.89(13) |
| C(10)-C(11)-P(1)    | 111.00(13) | C(21)-C(20)-P(2)    | 114.79(13) |
| C(12)-C(11)-H(11)   | 106.9      | C(19)-C(20)-H(20)   | 106.7      |
| C(10)-C(11)-H(11)   | 106.9      | C(21)-C(20)-H(20)   | 106.7      |
| P(1)-C(11)-H(11)    | 106.9      | P(2)-C(20)-H(20)    | 106.7      |
| C(11)-C(12)-H(12A)  | 109.5      | C(20)-C(21)-H(21A)  | 109.5      |
| C(11)-C(12)-H(12B)  | 109.5      | C(20)-C(21)-H(21B)  | 109.5      |
| H(12A)-C(12)-H(12B) | 109.5      | H(21A)-C(21)-H(21B) | 109.5      |
| C(11)-C(12)-H(12C)  | 109.5      | C(20)-C(21)-H(21C)  | 109.5      |
| H(12A)-C(12)-H(12C) | 109.5      | H(21A)-C(21)-H(21C) | 109.5      |
| H(12B)-C(12)-H(12C) | 109.5      | H(21B)-C(21)-H(21C) | 109.5      |
| C(14)-C(13)-H(13A)  | 109.5      | C(23)-C(22)-H(22A)  | 109.5      |
| C(14)-C(13)-H(13B)  | 109.5      | C(23)-C(22)-H(22B)  | 109.5      |
| H(13A)-C(13)-H(13B) | 109.5      | H(22A)-C(22)-H(22B) | 109.5      |
| C(14)-C(13)-H(13C)  | 109.5      | C(23)-C(22)-H(22C)  | 109.5      |
| H(13A)-C(13)-H(13C) | 109.5      | H(22A)-C(22)-H(22C) | 109.5      |
| H(13B)-C(13)-H(13C) | 109.5      | H(22B)-C(22)-H(22C) | 109.5      |
| C(15)-C(14)-C(13)   | 110.70(16) | C(24B)-C(23)-C(24A) | 35.6(2)    |
| C(15)-C(14)-P(1)    | 117.66(13) | C(24B)-C(23)-C(22)  | 117.0(3)   |
| C(13)-C(14)-P(1)    | 111.46(13) | C(24A)-C(23)-C(22)  | 121.8(3)   |
| C(15)-C(14)-H(14)   | 105.3      | C(24B)-C(23)-P(3)   | 123.0(3)   |
| C(13)-C(14)-H(14)   | 105.3      | C(24A)-C(23)-P(3)   | 122.8(3)   |
| P(1)-C(14)-H(14)    | 105.3      | C(22)-C(23)-P(3)    | 113.80(16) |
| C(14)-C(15)-H(15A)  | 109.5      | C(24B)-C(23)-H(23)  | 58.4       |
| C(14)-C(15)-H(15B)  | 109.5      | C(24A)-C(23)-H(23)  | 93.9       |
| H(15A)-C(15)-H(15B) | 109.5      | C(22)-C(23)-H(23)   | 94.2       |
| C(14)-C(15)-H(15C)  | 109.5      | P(3)-C(23)-H(23)    | 94.4       |
| H(15A)-C(15)-H(15C) | 109.5      | C(26)-C(25)-H(25A)  | 109.5      |
| H(15B)-C(15)-H(15C) | 109.5      | C(26)-C(25)-H(25B)  | 109.5      |
| C(17)-C(16)-H(16A)  | 109.5      | H(25A)-C(25)-H(25B) | 109.5      |
| C(17)-C(16)-H(16B)  | 109.5      | C(26)-C(25)-H(25C)  | 109.5      |
| H(16A)-C(16)-H(16B) | 109.5      | H(25A)-C(25)-H(25C) | 109.5      |
| C(17)-C(16)-H(16C)  | 109.5      | H(25B)-C(25)-H(25C) | 109.5      |
| H(16A)-C(16)-H(16C) | 109.5      | C(27)-C(26)-C(25)   | 111.23(18) |
| H(16B)-C(16)-H(16C) | 109.5      | C(27)-C(26)-P(3)    | 116.62(15) |
| C(18)-C(17)-C(16)   | 111.32(16) | C(25)-C(26)-P(3)    | 112.13(14) |
| C(18)-C(17)-P(2)    | 114.60(12) | C(27)-C(26)-H(26)   | 105.3      |
| C(16)-C(17)-P(2)    | 112.27(13) | C(25)-C(26)-H(26)   | 105.3      |
| C(18)-C(17)-H(17)   | 106.0      | P(3)-C(26)-H(26)    | 105.3      |
| C(16)-C(17)-H(17)   | 106.0      | C(26)-C(27)-H(27A)  | 109.5      |
| P(2)-C(17)-H(17)    | 106.0      | C(26)-C(27)-H(27B)  | 109.5      |
| C(17)-C(18)-H(18A)  | 109.5      | H(27A)-C(27)-H(27B) | 109.5      |
| C(17)-C(18)-H(18B)  | 109.5      | C(26)-C(27)-H(27C)  | 109.5      |
| H(18A)-C(18)-H(18B) | 109.5      | H(27A)-C(27)-H(27C) | 109.5      |
| C(17)-C(18)-H(18C)  | 109.5      | H(27B)-C(27)-H(27C) | 109.5      |
| H(18A)-C(18)-H(18C) | 109.5      | N-C(28)-C(29)       | 119.72(17) |
| H(18B)-C(18)-H(18C) | 109.5      | N-C(28)-C(33)       | 121.79(18) |
| C(20)-C(19)-H(19A)  | 109.5      | C(29)-C(28)-C(33)   | 118.50(17) |
| C(20)-C(19)-H(19B)  | 109.5      | C(30)-C(29)-C(28)   | 119.54(18) |
| H(19A)-C(19)-H(19B) | 109.5      | C(30)-C(29)-C(35)   | 120.31(18) |
| C(20)-C(19)-H(19C)  | 109.5      | C(28)-C(29)-C(35)   | 119.86(17) |
| H(19A)-C(19)-H(19C) | 109.5      | C(31)-C(30)-C(29)   | 121.7(2)   |
| H(19B)-C(19)-H(19C) | 109.5      | C(31)-C(30)-H(30)   | 119.1      |

|                     |            |                      |           |
|---------------------|------------|----------------------|-----------|
| C(29)-C(30)-H(30)   | 119.1      | C(39B)-C(38)-C(37B)  | 116.8(11) |
| C(32)-C(31)-C(30)   | 118.86(19) | C(37A)-C(38)-C(37B)  | 53.1(5)   |
| C(32)-C(31)-H(31)   | 120.6      | C(33)-C(38)-C(37B)   | 106.0(6)  |
| C(30)-C(31)-H(31)   | 120.6      | C(39A)-C(38)-C(37B)  | 67.3(6)   |
| C(31)-C(32)-C(33)   | 122.6(2)   | C(39B)-C(38)-H(38)   | 48.1      |
| C(31)-C(32)-H(32)   | 118.7      | C(37A)-C(38)-H(38)   | 106.0     |
| C(33)-C(32)-H(32)   | 118.7      | C(33)-C(38)-H(38)    | 106.0     |
| C(32)-C(33)-C(28)   | 118.78(19) | C(39A)-C(38)-H(38)   | 106.0     |
| C(32)-C(33)-C(38)   | 121.00(19) | C(37B)-C(38)-H(38)   | 147.1     |
| C(28)-C(33)-C(38)   | 120.20(18) | C(23)-C(24B)-H(23)   | 46.2      |
| C(35)-C(34)-H(34A)  | 109.5      | C(23)-C(24B)-H(24F)  | 109.5     |
| C(35)-C(34)-H(34B)  | 109.5      | H(23)-C(24B)-H(24F)  | 123.7     |
| H(34A)-C(34)-H(34B) | 109.5      | C(23)-C(24B)-H(24D)  | 109.5     |
| C(35)-C(34)-H(34C)  | 109.5      | H(23)-C(24B)-H(24D)  | 63.3      |
| H(34A)-C(34)-H(34C) | 109.5      | C(23)-C(24B)-H(24E)  | 109.5     |
| H(34B)-C(34)-H(34C) | 109.5      | H(23)-C(24B)-H(24E)  | 125.9     |
| C(29)-C(35)-C(36)   | 115.18(17) | C(23)-C(24A)-H(24A)  | 109.5     |
| C(29)-C(35)-C(34)   | 109.10(17) | C(23)-C(24A)-H(24B)  | 109.5     |
| C(36)-C(35)-C(34)   | 110.51(17) | H(24A)-C(24A)-H(24B) | 109.5     |
| C(29)-C(35)-H(35)   | 107.2      | C(23)-C(24A)-H(24C)  | 109.5     |
| C(36)-C(35)-H(35)   | 107.2      | H(24A)-C(24A)-H(24C) | 109.5     |
| C(34)-C(35)-H(35)   | 107.2      | H(24B)-C(24A)-H(24C) | 109.5     |
| C(35)-C(36)-H(36A)  | 109.5      | C(38)-C(37A)-H(37A)  | 109.5     |
| C(35)-C(36)-H(36B)  | 109.5      | C(38)-C(37A)-H(37B)  | 109.5     |
| H(36A)-C(36)-H(36B) | 109.5      | C(38)-C(37A)-H(37C)  | 109.5     |
| C(35)-C(36)-H(36C)  | 109.5      | C(38)-C(39A)-H(39A)  | 109.5     |
| H(36A)-C(36)-H(36C) | 109.5      | C(38)-C(39A)-H(39B)  | 109.5     |
| H(36B)-C(36)-H(36C) | 109.5      | C(38)-C(39A)-H(39C)  | 109.5     |
| C(39B)-C(38)-C(37A) | 122.1(8)   | C(38)-C(37B)-H(37D)  | 109.5     |
| C(39B)-C(38)-C(33)  | 122.9(8)   | C(38)-C(37B)-H(37E)  | 109.5     |
| C(37A)-C(38)-C(33)  | 113.4(2)   | C(38)-C(37B)-H(37F)  | 109.5     |
| C(39B)-C(38)-C(39A) | 57.9(9)    | C(38)-C(39B)-H(39D)  | 109.5     |
| C(37A)-C(38)-C(39A) | 110.7(2)   | C(38)-C(39B)-H(39E)  | 109.5     |
| C(33)-C(38)-C(39A)  | 114.06(19) | C(38)-C(39B)-H(39F)  | 109.5     |

---

Symmetry transformations used to generate equivalent atoms:

**Table 24. Anisotropic displacement parameters ( $\text{\AA}^2 \times 10^4$ ) for  $[\text{PhBP}^{i\text{Pr}}_3]\text{Mn}(\text{NH}(2,6\text{-}i\text{Pr}_2\text{-C}_6\text{H}_3))$  (6). The anisotropic displacement factor exponent takes the form:  $-2\pi^2[\text{h}^2\text{a}^*{}^2\text{U}^{11} + \dots + 2\text{h k a}^* \text{b}^* \text{U}^{12}]$**

|        | $\text{U}^{11}$ | $\text{U}^{22}$ | $\text{U}^{33}$ | $\text{U}^{23}$ | $\text{U}^{13}$ | $\text{U}^{12}$ |
|--------|-----------------|-----------------|-----------------|-----------------|-----------------|-----------------|
| Mn     | 153(2)          | 135(2)          | 215(2)          | 10(1)           | 15(1)           | 34(1)           |
| P(1)   | 138(3)          | 125(3)          | 202(3)          | 31(2)           | 22(2)           | 33(2)           |
| P(2)   | 137(3)          | 157(3)          | 183(3)          | 18(2)           | 28(2)           | 34(2)           |
| P(3)   | 223(3)          | 169(3)          | 183(3)          | 16(2)           | 30(2)           | 70(2)           |
| B      | 162(12)         | 134(11)         | 193(13)         | 24(9)           | 24(10)          | 41(9)           |
| N      | 154(9)          | 170(9)          | 326(11)         | -2(8)           | -18(8)          | 50(8)           |
| C(1)   | 181(10)         | 155(10)         | 148(10)         | 51(8)           | -15(8)          | 68(8)           |
| C(2)   | 219(11)         | 169(10)         | 301(12)         | 40(9)           | 57(10)          | 64(9)           |
| C(3)   | 194(11)         | 226(11)         | 349(13)         | 121(10)         | 35(10)          | 7(9)            |
| C(4)   | 285(12)         | 120(10)         | 296(13)         | 58(9)           | -38(10)         | -17(9)          |
| C(5)   | 304(12)         | 148(10)         | 202(11)         | 27(9)           | -13(9)          | 65(9)           |
| C(6)   | 201(11)         | 156(10)         | 180(11)         | 69(8)           | 18(9)           | 42(8)           |
| C(7)   | 144(10)         | 128(9)          | 182(11)         | 17(8)           | 32(8)           | 20(8)           |
| C(8)   | 183(10)         | 120(9)          | 177(11)         | 10(8)           | 10(8)           | 50(8)           |
| C(9)   | 195(11)         | 127(10)         | 222(11)         | 26(8)           | 48(9)           | 48(8)           |
| C(10)  | 218(11)         | 235(11)         | 303(13)         | 75(9)           | 66(10)          | 113(9)          |
| C(11)  | 158(10)         | 142(10)         | 256(12)         | 74(9)           | 50(9)           | 59(8)           |
| C(12)  | 192(11)         | 241(11)         | 279(12)         | 50(9)           | 22(9)           | 106(9)          |
| C(13)  | 289(12)         | 257(11)         | 260(12)         | 96(10)          | 80(10)          | 89(10)          |
| C(14)  | 155(10)         | 204(10)         | 241(12)         | 62(9)           | 55(9)           | 59(9)           |
| C(15)  | 284(12)         | 277(12)         | 240(12)         | 6(9)            | 50(10)          | 114(10)         |
| C(16)  | 205(11)         | 260(12)         | 302(13)         | 82(10)          | 70(10)          | 6(9)            |
| C(17)  | 143(10)         | 236(11)         | 200(11)         | 40(9)           | 43(9)           | 39(9)           |
| C(18)  | 195(11)         | 334(12)         | 230(12)         | 52(10)          | 72(9)           | 67(10)          |
| C(19)  | 222(12)         | 341(13)         | 241(12)         | 21(10)          | -4(10)          | 101(10)         |
| C(20)  | 185(11)         | 220(11)         | 223(11)         | 44(9)           | 33(9)           | 80(9)           |
| C(21)  | 229(11)         | 286(12)         | 296(13)         | 55(10)          | 32(10)          | 135(10)         |
| C(22)  | 404(14)         | 303(13)         | 263(13)         | -23(10)         | -41(11)         | 132(11)         |
| C(23)  | 940(20)         | 250(14)         | 527(18)         | -26(13)         | -459(16)        | 169(14)         |
| C(25)  | 391(14)         | 359(13)         | 359(14)         | -31(11)         | 105(11)         | 186(11)         |
| C(26)  | 323(13)         | 270(12)         | 311(13)         | 55(10)          | 146(10)         | 117(10)         |
| C(27)  | 559(17)         | 461(15)         | 770(20)         | 279(15)         | 504(16)         | 249(14)         |
| C(28)  | 238(11)         | 194(11)         | 173(11)         | 35(9)           | 27(9)           | 36(9)           |
| C(29)  | 231(11)         | 176(10)         | 215(12)         | 35(9)           | 23(9)           | 33(9)           |
| C(30)  | 367(14)         | 211(12)         | 328(13)         | 38(10)          | 5(11)           | 106(10)         |
| C(31)  | 406(14)         | 167(11)         | 357(14)         | -48(10)         | -44(11)         | 34(11)          |
| C(32)  | 264(12)         | 262(12)         | 328(14)         | -26(10)         | -68(10)         | -45(10)         |
| C(33)  | 229(12)         | 254(12)         | 237(12)         | 10(9)           | 25(10)          | 35(10)          |
| C(34)  | 352(13)         | 253(12)         | 348(14)         | 19(10)          | -67(11)         | 85(10)          |
| C(35)  | 234(12)         | 141(10)         | 353(14)         | 33(9)           | 0(10)           | 42(9)           |
| C(36)  | 333(13)         | 231(12)         | 514(16)         | 53(11)          | 36(12)          | 118(10)         |
| C(38)  | 188(12)         | 333(14)         | 406(16)         | -58(12)         | -53(11)         | 37(10)          |
| C(24B) | 300(40)         | 270(30)         | 140(30)         | 30(20)          | 10(20)          | 80(30)          |
| C(24A) | 570(50)         | 400(30)         | 280(30)         | 110(20)         | -10(30)         | 70(30)          |
| C(37A) | 324(16)         | 461(18)         | 351(18)         | 6(14)           | 85(13)          | 88(14)          |
| C(39A) | 314(17)         | 600(20)         | 331(17)         | -77(15)         | -74(13)         | 181(15)         |

|        |          |          |          |          |         |          |
|--------|----------|----------|----------|----------|---------|----------|
| C(37B) | 170(90)  | 420(100) | 470(120) | 50(90)   | 110(80) | 0(80)    |
| C(39B) | 330(110) | 550(130) | 400(120) | -90(100) | 0(90)   | 280(100) |

---



**Table 25. Crystal Data and Structure Analysis Details for [PhBP<sup>iPr</sup><sub>3</sub>]Mn(dbabh) (7).**

|                         |                                                    |
|-------------------------|----------------------------------------------------|
| Empirical formula       | C <sub>41</sub> H <sub>63</sub> BMnNP <sub>3</sub> |
| Formula weight          | 728.58                                             |
| Crystallization solvent | Et <sub>2</sub> O                                  |
| Crystal shape           | rough block                                        |
| Crystal color           | yellow                                             |
| Crystal size            | 0.29 x 0.33 x 0.33 mm                              |

### Data Collection

|                                                                 |                                                        |                                                                         |
|-----------------------------------------------------------------|--------------------------------------------------------|-------------------------------------------------------------------------|
| Preliminary photograph(s)                                       | rotation                                               |                                                                         |
| Type of diffractometer                                          | Bruker SMART 1000                                      |                                                                         |
| Wavelength                                                      | 0.71073 Å MoK $\alpha$                                 |                                                                         |
| Data collection temperature                                     | 100 K                                                  |                                                                         |
| Theta range for 36539 reflections used in lattice determination | 2.56 to 30.67°                                         |                                                                         |
| Unit cell dimensions                                            | a = 10.4294(9) Å<br>b = 16.812(1) Å<br>c = 23.393(2) Å | $\alpha = 90^\circ$<br>$\beta = 97.476(1)^\circ$<br>$\gamma = 90^\circ$ |
| Volume                                                          | 4066.7(6) Å <sup>3</sup>                               |                                                                         |
| Z                                                               | 4                                                      |                                                                         |
| Crystal system                                                  | monoclinic                                             |                                                                         |
| Space group                                                     | P 21/c (# 14)                                          |                                                                         |
| Density (calculated)                                            | 1.190 g/cm <sup>3</sup>                                |                                                                         |
| F(000)                                                          | 1564                                                   |                                                                         |
| Theta range for data collection                                 | 1.5 to 30.6°                                           |                                                                         |
| Completeness to theta = 30.62°                                  | 89.9%                                                  |                                                                         |
| Index ranges                                                    | -14 ≤ h ≤ 14, -23 ≤ k ≤ 23, -32 ≤ l ≤ 30               |                                                                         |
| Data collection scan type                                       | $\omega$ scans                                         |                                                                         |
| Reflections collected                                           | 63707                                                  |                                                                         |
| Independent reflections                                         | 11277 [R <sub>int</sub> = 0.0581]                      |                                                                         |
| Reflections > 2 $\sigma$ (I)                                    | 8678                                                   |                                                                         |
| Average $\sigma$ (I)/(net I)                                    | 0.0428                                                 |                                                                         |
| Absorption coefficient                                          | 0.47 mm <sup>-1</sup>                                  |                                                                         |
| Absorption correction                                           | none                                                   |                                                                         |
| Reflections monitored for decay                                 | initial data recollected at end                        |                                                                         |
| Decay of standards                                              | 0%                                                     |                                                                         |

**Table 25 (cont.)****Structure Solution and Refinement**

|                                                        |                                                                              |
|--------------------------------------------------------|------------------------------------------------------------------------------|
| Primary solution method                                | direct methods                                                               |
| Secondary solution method                              | difference map                                                               |
| Hydrogen placement                                     | calculated                                                                   |
| Refinement method                                      | Full-matrix least-squares on $F^2$                                           |
| Data / restraints / parameters                         | 11277 / 0 / 436                                                              |
| Treatment of hydrogen atoms                            | not refined, $U_{\text{iso}}$ fixed at 120% $U_{\text{eq}}$ of attached atom |
| Goodness-of-fit on $F^2$                               | 2.04                                                                         |
| Final R indices [ $I > 2\sigma(I)$ , 8678 reflections] | $R1 = 0.0409$ , $wR2 = 0.0724$                                               |
| R indices (all data)                                   | $R1 = 0.0586$ , $wR2 = 0.0739$                                               |
| Type of weighting scheme used                          | sigma                                                                        |
| Weighting scheme used                                  | calc $w=1/[\sigma^2(F_o^2)]$ where $P=(F_o^2+2F_c^2)/3$                      |
| Max shift/error                                        | 0.002                                                                        |
| Average shift/error                                    | 0.000                                                                        |
| Largest diff. peak and hole                            | 0.97 and -0.44 $e\cdot\text{\AA}^{-3}$                                       |

**Programs Used**

|                      |                     |
|----------------------|---------------------|
| Cell refinement      | Bruker SMART 5.606  |
| Data collection      | Bruker SMART 5.054  |
| Data reduction       | Bruker SAINT 6.45   |
| Structure solution   | Bruker SHELXTL 6.14 |
| Structure refinement | Bruker SHELXTL 6.14 |

**Special Refinement Details**

Refinement of  $F^2$  against ALL reflections. The weighted R-factor ( $wR$ ) and goodness of fit ( $S$ ) are based on  $F^2$ , conventional R-factors ( $R$ ) are based on  $F$ , with  $F$  set to zero for negative  $F^2$ . The threshold expression of  $F^2 > 2\sigma(F^2)$  is used only for calculating R-factors(gt) etc. and is not relevant to the choice of reflections for refinement. R-factors based on  $F^2$  are statistically about twice as large as those based on  $F$ , and R-factors based on ALL data will be even larger.

All esds (except the esd in the dihedral angle between two l.s. planes) are estimated using the full covariance matrix. The cell esds are taken into account individually in the estimation of esds in distances, angles and torsion angles; correlations between esds in cell parameters are only used when they are defined by crystal symmetry. An approximate (isotropic) treatment of cell esds is used for estimating esds involving l.s. planes.

**Table 26. Atomic coordinates ( $\times 10^4$ ) and equivalent isotropic displacement parameters ( $\text{\AA}^2 \times 10^3$ ) for  $[\text{PhBP}^{i\text{Pr}}_3]\text{Mn}(\text{dbabh})$  (7).  $U(\text{eq})$  is defined as one third of the trace of the orthogonalized  $U_{ij}$  tensor.**

|       | x           | y          | z         | $U_{\text{eq}}$ |
|-------|-------------|------------|-----------|-----------------|
| Mn    | 2548.7(2)   | 2552.7(1)  | 3810.9(1) | 14.8(1)         |
| P(1)  | 1437.0(4)   | 2815.4(2)  | 2798.9(2) | 17.5(1)         |
| P(2)  | 4170.9(4)   | 3657.2(2)  | 3701.3(2) | 17.1(1)         |
| P(3)  | 4067.2(4)   | 1557.0(2)  | 3423.7(2) | 15.8(1)         |
| B     | 4198.7(17)  | 2854.5(10) | 2542.6(7) | 15.6(4)         |
| N     | 1697.8(12)  | 2348.3(8)  | 4489.8(5) | 19.2(3)         |
| C(1)  | 4934.4(14)  | 3021.9(8)  | 1973.6(6) | 15.1(3)         |
| C(2)  | 4416.1(15)  | 3548.6(9)  | 1537.5(6) | 19.2(3)         |
| C(3)  | 5002.5(15)  | 3698.3(9)  | 1048.9(6) | 20.1(3)         |
| C(4)  | 6154.5(16)  | 3336.1(9)  | 977.3(6)  | 23.4(4)         |
| C(5)  | 6716.0(17)  | 2824.2(11) | 1398.8(7) | 30.5(4)         |
| C(6)  | 6110.1(16)  | 2676.7(10) | 1884.2(7) | 25.9(4)         |
| C(7)  | 2636.0(14)  | 2690.4(9)  | 2305.5(6) | 19.3(3)         |
| C(8)  | 4477.0(15)  | 3676.1(9)  | 2947.7(6) | 19.6(3)         |
| C(9)  | 4861.2(15)  | 2045.6(9)  | 2868.7(6) | 18.6(3)         |
| C(10) | -739.6(17)  | 1908.4(12) | 2954.6(8) | 40.2(5)         |
| C(11) | -117.2(15)  | 2328.4(10) | 2481.6(7) | 25.2(4)         |
| C(12) | 10.0(17)    | 1767.9(11) | 1980.6(8) | 33.8(4)         |
| C(13) | -100.9(17)  | 4045.7(10) | 3134.6(7) | 30.6(4)         |
| C(14) | 1014.5(16)  | 3882.7(9)  | 2783.2(7) | 22.8(4)         |
| C(15) | 755.9(19)   | 4252.6(11) | 2183.6(7) | 36.5(5)         |
| C(16) | 2885.1(18)  | 4727.3(10) | 4340.9(8) | 33.2(4)         |
| C(17) | 3987.4(16)  | 4697.3(9)  | 3974.5(7) | 24.4(4)         |
| C(18) | 3844.6(19)  | 5344.9(10) | 3514.0(8) | 34.9(5)         |
| C(19) | 5532.0(17)  | 3292.2(10) | 4773.1(7) | 29.0(4)         |
| C(20) | 5697.6(16)  | 3320.3(10) | 4129.7(7) | 24.4(4)         |
| C(21) | 6910.6(16)  | 3777.3(12) | 4035.7(8) | 37.7(5)         |
| C(22) | 5170.6(17)  | 948.6(10)  | 4488.0(6) | 28.7(4)         |
| C(23) | 5292.6(16)  | 899.7(10)  | 3851.8(7) | 25.4(4)         |
| C(24) | 6655.3(16)  | 985.3(11)  | 3719.8(8) | 36.6(5)         |
| C(25) | 2271.5(16)  | 373.3(10)  | 3524.6(7) | 25.9(4)         |
| C(26) | 2927.9(15)  | 813.2(9)   | 3067.1(7) | 20.6(3)         |
| C(27) | 3467.7(17)  | 231.8(10)  | 2659.0(7) | 28.8(4)         |
| C(28) | 443.8(15)   | 2608.7(9)  | 4659.3(6) | 19.4(3)         |
| C(29) | 896.6(16)   | 3226.1(9)  | 5126.9(6) | 21.1(4)         |
| C(30) | 392.7(18)   | 3930.9(10) | 5297.8(7) | 27.9(4)         |
| C(31) | 1126(2)     | 4352.4(10) | 5746.2(8) | 35.4(5)         |
| C(32) | 2280(2)     | 4058.3(11) | 6012.9(7) | 34.7(5)         |
| C(33) | 2770.1(17)  | 3332.6(10) | 5848.5(7) | 27.9(4)         |
| C(34) | 2073.6(16)  | 2928.4(9)  | 5399.6(6) | 20.5(3)         |
| C(35) | 2283.2(15)  | 2146.1(9)  | 5084.4(6) | 18.7(3)         |
| C(36) | 1262.8(15)  | 1573.4(9)  | 5255.2(6) | 17.2(3)         |
| C(37) | 1305.3(16)  | 898.4(9)   | 5590.5(6) | 20.5(3)         |
| C(38) | 138.0(16)   | 504.9(10)  | 5644.5(7) | 24.6(4)         |
| C(39) | -1018.9(16) | 804.8(10)  | 5385.1(7) | 25.3(4)         |
| C(40) | -1065.2(16) | 1503.0(9)  | 5054.2(7) | 23.2(4)         |

C(41)

78.4(15)

1871.2(9)

4984.8(6)

18.5(3)

---

**Table 27. Bond lengths [Å] and angles [°] for [PhBP<sup>i</sup>Pr<sub>3</sub>]Mn(dbabh) (7).**

|              |            |              |          |
|--------------|------------|--------------|----------|
| Mn-N         | 1.948(1)   | C(15)-H(15A) | 0.9800   |
| Mn-P(1)      | 2.5357(5)  | C(15)-H(15B) | 0.9800   |
| Mn-P(2)      | 2.5473(5)  | C(15)-H(15C) | 0.9800   |
| Mn-P(3)      | 2.5503(5)  | C(16)-C(17)  | 1.522(2) |
| P(1)-C(7)    | 1.8208(15) | C(16)-H(16A) | 0.9800   |
| P(1)-C(14)   | 1.8469(16) | C(16)-H(16B) | 0.9800   |
| P(1)-C(11)   | 1.8803(16) | C(16)-H(16C) | 0.9800   |
| P(2)-C(8)    | 1.8321(15) | C(17)-C(18)  | 1.525(2) |
| P(2)-C(20)   | 1.8561(16) | C(17)-H(17)  | 1.0000   |
| P(2)-C(17)   | 1.8800(16) | C(18)-H(18A) | 0.9800   |
| P(3)-C(9)    | 1.8238(15) | C(18)-H(18B) | 0.9800   |
| P(3)-C(26)   | 1.8475(15) | C(18)-H(18C) | 0.9800   |
| P(3)-C(23)   | 1.8773(16) | C(19)-C(20)  | 1.538(2) |
| B-C(1)       | 1.645(2)   | C(19)-H(19A) | 0.9800   |
| B-C(9)       | 1.665(2)   | C(19)-H(19B) | 0.9800   |
| B-C(7)       | 1.675(2)   | C(19)-H(19C) | 0.9800   |
| B-C(8)       | 1.679(2)   | C(20)-C(21)  | 1.520(2) |
| N-C(28)      | 1.4814(19) | C(20)-H(20)  | 1.0000   |
| N-C(35)      | 1.4840(18) | C(21)-H(21A) | 0.9800   |
| C(1)-C(6)    | 1.397(2)   | C(21)-H(21B) | 0.9800   |
| C(1)-C(2)    | 1.405(2)   | C(21)-H(21C) | 0.9800   |
| C(2)-C(3)    | 1.388(2)   | C(22)-C(23)  | 1.512(2) |
| C(2)-H(2)    | 0.9500     | C(22)-H(22A) | 0.9800   |
| C(3)-C(4)    | 1.376(2)   | C(22)-H(22B) | 0.9800   |
| C(3)-H(3)    | 0.9500     | C(22)-H(22C) | 0.9800   |
| C(4)-C(5)    | 1.380(2)   | C(23)-C(24)  | 1.500(2) |
| C(4)-H(4)    | 0.9500     | C(23)-H(23)  | 1.0000   |
| C(5)-C(6)    | 1.392(2)   | C(24)-H(24A) | 0.9800   |
| C(5)-H(5)    | 0.9500     | C(24)-H(24B) | 0.9800   |
| C(6)-H(6)    | 0.9500     | C(24)-H(24C) | 0.9800   |
| C(7)-H(7A)   | 0.9900     | C(25)-C(26)  | 1.533(2) |
| C(7)-H(7B)   | 0.9900     | C(25)-H(25A) | 0.9800   |
| C(8)-H(8A)   | 0.9900     | C(25)-H(25B) | 0.9800   |
| C(8)-H(8B)   | 0.9900     | C(25)-H(25C) | 0.9800   |
| C(9)-H(9A)   | 0.9900     | C(26)-C(27)  | 1.524(2) |
| C(9)-H(9B)   | 0.9900     | C(26)-H(26)  | 1.0000   |
| C(10)-C(11)  | 1.527(2)   | C(27)-H(27A) | 0.9800   |
| C(10)-H(10A) | 0.9800     | C(27)-H(27B) | 0.9800   |
| C(10)-H(10B) | 0.9800     | C(27)-H(27C) | 0.9800   |
| C(10)-H(10C) | 0.9800     | C(28)-C(41)  | 1.529(2) |
| C(11)-C(12)  | 1.523(2)   | C(28)-C(29)  | 1.537(2) |
| C(11)-H(11)  | 1.0000     | C(28)-H(28)  | 1.0000   |
| C(12)-H(12A) | 0.9800     | C(29)-C(30)  | 1.376(2) |
| C(12)-H(12B) | 0.9800     | C(29)-C(34)  | 1.400(2) |
| C(12)-H(12C) | 0.9800     | C(30)-C(31)  | 1.407(2) |
| C(13)-C(14)  | 1.534(2)   | C(30)-H(30)  | 0.9500   |
| C(13)-H(13A) | 0.9800     | C(31)-C(32)  | 1.373(3) |
| C(13)-H(13B) | 0.9800     | C(31)-H(31)  | 0.9500   |
| C(13)-H(13C) | 0.9800     | C(32)-C(33)  | 1.396(2) |
| C(14)-C(15)  | 1.526(2)   | C(32)-H(32)  | 0.9500   |
| C(14)-H(14)  | 1.0000     | C(33)-C(34)  | 1.376(2) |

|                  |            |                     |            |
|------------------|------------|---------------------|------------|
| C(33)-H(33)      | 0.9500     | C(4)-C(3)-C(2)      | 120.34(14) |
| C(34)-C(35)      | 1.537(2)   | C(4)-C(3)-H(3)      | 119.8      |
| C(35)-C(36)      | 1.526(2)   | C(2)-C(3)-H(3)      | 119.8      |
| C(35)-H(35)      | 1.0000     | C(5)-C(4)-C(3)      | 119.01(15) |
| C(36)-C(37)      | 1.377(2)   | C(5)-C(4)-H(4)      | 120.5      |
| C(36)-C(41)      | 1.405(2)   | C(3)-C(4)-H(4)      | 120.5      |
| C(37)-C(38)      | 1.406(2)   | C(4)-C(5)-C(6)      | 119.89(16) |
| C(37)-H(37)      | 0.9500     | C(4)-C(5)-H(5)      | 120.1      |
| C(38)-C(39)      | 1.374(2)   | C(6)-C(5)-H(5)      | 120.1      |
| C(38)-H(38)      | 0.9500     | C(5)-C(6)-C(1)      | 123.28(15) |
| C(39)-C(40)      | 1.403(2)   | C(5)-C(6)-H(6)      | 118.4      |
| C(39)-H(39)      | 0.9500     | C(1)-C(6)-H(6)      | 118.4      |
| C(40)-C(41)      | 1.372(2)   | B-C(7)-P(1)         | 119.34(10) |
| C(40)-H(40)      | 0.9500     | B-C(7)-H(7A)        | 107.5      |
|                  |            | P(1)-C(7)-H(7A)     | 107.5      |
| N-Mn-P(1)        | 126.19(4)  | B-C(7)-H(7B)        | 107.5      |
| N-Mn-P(2)        | 126.13(4)  | P(1)-C(7)-H(7B)     | 107.5      |
| P(1)-Mn-P(2)     | 90.46(2)   | H(7A)-C(7)-H(7B)    | 107.0      |
| N-Mn-P(3)        | 122.92(4)  | B-C(8)-P(2)         | 119.33(10) |
| P(1)-Mn-P(3)     | 90.71(2)   | B-C(8)-H(8A)        | 107.5      |
| P(2)-Mn-P(3)     | 89.51(2)   | P(2)-C(8)-H(8A)     | 107.5      |
| C(7)-P(1)-C(14)  | 106.34(7)  | B-C(8)-H(8B)        | 107.5      |
| C(7)-P(1)-C(11)  | 109.11(7)  | P(2)-C(8)-H(8B)     | 107.5      |
| C(14)-P(1)-C(11) | 102.95(8)  | H(8A)-C(8)-H(8B)    | 107.0      |
| C(7)-P(1)-Mn     | 107.66(5)  | B-C(9)-P(3)         | 119.62(10) |
| C(14)-P(1)-Mn    | 105.46(5)  | B-C(9)-H(9A)        | 107.4      |
| C(11)-P(1)-Mn    | 123.97(5)  | P(3)-C(9)-H(9A)     | 107.4      |
| C(8)-P(2)-C(20)  | 106.27(7)  | B-C(9)-H(9B)        | 107.4      |
| C(8)-P(2)-C(17)  | 110.44(7)  | P(3)-C(9)-H(9B)     | 107.4      |
| C(20)-P(2)-C(17) | 102.61(8)  | H(9A)-C(9)-H(9B)    | 106.9      |
| C(8)-P(2)-Mn     | 108.10(5)  | C(11)-C(10)-H(10A)  | 109.5      |
| C(20)-P(2)-Mn    | 104.92(5)  | C(11)-C(10)-H(10B)  | 109.5      |
| C(17)-P(2)-Mn    | 123.05(5)  | H(10A)-C(10)-H(10B) | 109.5      |
| C(9)-P(3)-C(26)  | 107.96(7)  | C(11)-C(10)-H(10C)  | 109.5      |
| C(9)-P(3)-C(23)  | 107.71(7)  | H(10A)-C(10)-H(10C) | 109.5      |
| C(26)-P(3)-C(23) | 101.28(7)  | H(10B)-C(10)-H(10C) | 109.5      |
| C(9)-P(3)-Mn     | 108.52(5)  | C(12)-C(11)-C(10)   | 111.07(15) |
| C(26)-P(3)-Mn    | 102.24(5)  | C(12)-C(11)-P(1)    | 114.59(12) |
| C(23)-P(3)-Mn    | 127.45(5)  | C(10)-C(11)-P(1)    | 109.95(11) |
| C(1)-B-C(9)      | 107.52(12) | C(12)-C(11)-H(11)   | 106.9      |
| C(1)-B-C(7)      | 107.24(11) | C(10)-C(11)-H(11)   | 106.9      |
| C(9)-B-C(7)      | 110.19(12) | P(1)-C(11)-H(11)    | 106.9      |
| C(1)-B-C(8)      | 104.56(12) | C(11)-C(12)-H(12A)  | 109.5      |
| C(9)-B-C(8)      | 112.49(12) | C(11)-C(12)-H(12B)  | 109.5      |
| C(7)-B-C(8)      | 114.32(12) | H(12A)-C(12)-H(12B) | 109.5      |
| C(28)-N-C(35)    | 94.97(11)  | C(11)-C(12)-H(12C)  | 109.5      |
| C(28)-N-Mn       | 132.67(10) | H(12A)-C(12)-H(12C) | 109.5      |
| C(35)-N-Mn       | 128.99(10) | H(12B)-C(12)-H(12C) | 109.5      |
| C(6)-C(1)-C(2)   | 114.56(14) | C(14)-C(13)-H(13A)  | 109.5      |
| C(6)-C(1)-B      | 124.13(13) | C(14)-C(13)-H(13B)  | 109.5      |
| C(2)-C(1)-B      | 121.31(13) | H(13A)-C(13)-H(13B) | 109.5      |
| C(3)-C(2)-C(1)   | 122.91(14) | C(14)-C(13)-H(13C)  | 109.5      |
| C(3)-C(2)-H(2)   | 118.5      | H(13A)-C(13)-H(13C) | 109.5      |
| C(1)-C(2)-H(2)   | 118.5      | H(13B)-C(13)-H(13C) | 109.5      |

|                     |            |                     |            |
|---------------------|------------|---------------------|------------|
| C(15)-C(14)-C(13)   | 111.35(13) | C(24)-C(23)-C(22)   | 113.62(14) |
| C(15)-C(14)-P(1)    | 115.30(12) | C(24)-C(23)-P(3)    | 115.54(12) |
| C(13)-C(14)-P(1)    | 111.01(11) | C(22)-C(23)-P(3)    | 110.75(11) |
| C(15)-C(14)-H(14)   | 106.2      | C(24)-C(23)-H(23)   | 105.3      |
| C(13)-C(14)-H(14)   | 106.2      | C(22)-C(23)-H(23)   | 105.3      |
| P(1)-C(14)-H(14)    | 106.2      | P(3)-C(23)-H(23)    | 105.3      |
| C(14)-C(15)-H(15A)  | 109.5      | C(23)-C(24)-H(24A)  | 109.5      |
| C(14)-C(15)-H(15B)  | 109.5      | C(23)-C(24)-H(24B)  | 109.5      |
| H(15A)-C(15)-H(15B) | 109.5      | H(24A)-C(24)-H(24B) | 109.5      |
| C(14)-C(15)-H(15C)  | 109.5      | C(23)-C(24)-H(24C)  | 109.5      |
| H(15A)-C(15)-H(15C) | 109.5      | H(24A)-C(24)-H(24C) | 109.5      |
| H(15B)-C(15)-H(15C) | 109.5      | H(24B)-C(24)-H(24C) | 109.5      |
| C(17)-C(16)-H(16A)  | 109.5      | C(26)-C(25)-H(25A)  | 109.5      |
| C(17)-C(16)-H(16B)  | 109.5      | C(26)-C(25)-H(25B)  | 109.5      |
| H(16A)-C(16)-H(16B) | 109.5      | H(25A)-C(25)-H(25B) | 109.5      |
| C(17)-C(16)-H(16C)  | 109.5      | C(26)-C(25)-H(25C)  | 109.5      |
| H(16A)-C(16)-H(16C) | 109.5      | H(25A)-C(25)-H(25C) | 109.5      |
| H(16B)-C(16)-H(16C) | 109.5      | H(25B)-C(25)-H(25C) | 109.5      |
| C(16)-C(17)-C(18)   | 111.26(14) | C(27)-C(26)-C(25)   | 111.27(13) |
| C(16)-C(17)-P(2)    | 109.89(11) | C(27)-C(26)-P(3)    | 116.65(11) |
| C(18)-C(17)-P(2)    | 115.38(11) | C(25)-C(26)-P(3)    | 109.30(11) |
| C(16)-C(17)-H(17)   | 106.6      | C(27)-C(26)-H(26)   | 106.3      |
| C(18)-C(17)-H(17)   | 106.6      | C(25)-C(26)-H(26)   | 106.3      |
| P(2)-C(17)-H(17)    | 106.6      | P(3)-C(26)-H(26)    | 106.3      |
| C(17)-C(18)-H(18A)  | 109.5      | C(26)-C(27)-H(27A)  | 109.5      |
| C(17)-C(18)-H(18B)  | 109.5      | C(26)-C(27)-H(27B)  | 109.5      |
| H(18A)-C(18)-H(18B) | 109.5      | H(27A)-C(27)-H(27B) | 109.5      |
| C(17)-C(18)-H(18C)  | 109.5      | C(26)-C(27)-H(27C)  | 109.5      |
| H(18A)-C(18)-H(18C) | 109.5      | H(27A)-C(27)-H(27C) | 109.5      |
| H(18B)-C(18)-H(18C) | 109.5      | H(27B)-C(27)-H(27C) | 109.5      |
| C(20)-C(19)-H(19A)  | 109.5      | N-C(28)-C(41)       | 100.34(12) |
| C(20)-C(19)-H(19B)  | 109.5      | N-C(28)-C(29)       | 100.95(12) |
| H(19A)-C(19)-H(19B) | 109.5      | C(41)-C(28)-C(29)   | 105.47(12) |
| C(20)-C(19)-H(19C)  | 109.5      | N-C(28)-H(28)       | 116.0      |
| H(19A)-C(19)-H(19C) | 109.5      | C(41)-C(28)-H(28)   | 116.0      |
| H(19B)-C(19)-H(19C) | 109.5      | C(29)-C(28)-H(28)   | 116.0      |
| C(21)-C(20)-C(19)   | 111.01(14) | C(30)-C(29)-C(34)   | 121.37(15) |
| C(21)-C(20)-P(2)    | 116.05(12) | C(30)-C(29)-C(28)   | 133.99(15) |
| C(19)-C(20)-P(2)    | 109.89(12) | C(34)-C(29)-C(28)   | 104.65(13) |
| C(21)-C(20)-H(20)   | 106.4      | C(29)-C(30)-C(31)   | 117.34(16) |
| C(19)-C(20)-H(20)   | 106.4      | C(29)-C(30)-H(30)   | 121.3      |
| P(2)-C(20)-H(20)    | 106.4      | C(31)-C(30)-H(30)   | 121.3      |
| C(20)-C(21)-H(21A)  | 109.5      | C(32)-C(31)-C(30)   | 121.10(16) |
| C(20)-C(21)-H(21B)  | 109.5      | C(32)-C(31)-H(31)   | 119.5      |
| H(21A)-C(21)-H(21B) | 109.5      | C(30)-C(31)-H(31)   | 119.5      |
| C(20)-C(21)-H(21C)  | 109.5      | C(31)-C(32)-C(33)   | 121.35(16) |
| H(21A)-C(21)-H(21C) | 109.5      | C(31)-C(32)-H(32)   | 119.3      |
| H(21B)-C(21)-H(21C) | 109.5      | C(33)-C(32)-H(32)   | 119.3      |
| C(23)-C(22)-H(22A)  | 109.5      | C(34)-C(33)-C(32)   | 117.76(16) |
| C(23)-C(22)-H(22B)  | 109.5      | C(34)-C(33)-H(33)   | 121.1      |
| H(22A)-C(22)-H(22B) | 109.5      | C(32)-C(33)-H(33)   | 121.1      |
| C(23)-C(22)-H(22C)  | 109.5      | C(33)-C(34)-C(29)   | 121.04(15) |
| H(22A)-C(22)-H(22C) | 109.5      | C(33)-C(34)-C(35)   | 134.00(15) |
| H(22B)-C(22)-H(22C) | 109.5      | C(29)-C(34)-C(35)   | 104.96(13) |

|                   |            |                   |            |
|-------------------|------------|-------------------|------------|
| N-C(35)-C(36)     | 100.02(11) | C(39)-C(38)-C(37) | 120.58(15) |
| N-C(35)-C(34)     | 100.77(11) | C(39)-C(38)-H(38) | 119.7      |
| C(36)-C(35)-C(34) | 105.47(12) | C(37)-C(38)-H(38) | 119.7      |
| N-C(35)-H(35)     | 116.1      | C(38)-C(39)-C(40) | 121.05(15) |
| C(36)-C(35)-H(35) | 116.1      | C(38)-C(39)-H(39) | 119.5      |
| C(34)-C(35)-H(35) | 116.1      | C(40)-C(39)-H(39) | 119.5      |
| C(37)-C(36)-C(41) | 120.76(14) | C(41)-C(40)-C(39) | 118.34(15) |
| C(37)-C(36)-C(35) | 134.19(14) | C(41)-C(40)-H(40) | 120.8      |
| C(41)-C(36)-C(35) | 105.04(13) | C(39)-C(40)-H(40) | 120.8      |
| C(36)-C(37)-C(38) | 118.36(15) | C(40)-C(41)-C(36) | 120.85(14) |
| C(36)-C(37)-H(37) | 120.8      | C(40)-C(41)-C(28) | 134.56(14) |
| C(38)-C(37)-H(37) | 120.8      | C(36)-C(41)-C(28) | 104.58(13) |

---

Symmetry transformations used to generate equivalent atoms:



**Table 28. Anisotropic displacement parameters ( $\text{\AA}^2 \times 10^4$ ) for  $[\text{PhBP}^{\text{iPr}}_3]\text{Mn}(\text{dbabh})$  (7). The anisotropic displacement factor exponent takes the form:  $-2\pi^2 [ h^2 a^{*2} U^{11} + \dots + 2 h k a^* b^* U^{12} ]$**

|       | $U^{11}$ | $U^{22}$ | $U^{33}$ | $U^{23}$ | $U^{13}$ | $U^{12}$ |
|-------|----------|----------|----------|----------|----------|----------|
| Mn    | 153(1)   | 165(1)   | 131(1)   | 12(1)    | 39(1)    | 4(1)     |
| P(1)  | 146(2)   | 232(2)   | 148(2)   | 15(2)    | 24(2)    | 19(2)    |
| P(2)  | 199(2)   | 166(2)   | 153(2)   | -3(2)    | 44(2)    | -21(2)   |
| P(3)  | 173(2)   | 150(2)   | 161(2)   | 28(2)    | 53(2)    | 14(2)    |
| B     | 159(9)   | 185(9)   | 128(8)   | 22(7)    | 30(7)    | 6(7)     |
| N     | 175(7)   | 273(8)   | 133(6)   | 15(5)    | 43(5)    | 58(6)    |
| C(1)  | 160(8)   | 155(8)   | 139(7)   | -14(6)   | 19(6)    | -23(6)   |
| C(2)  | 211(8)   | 187(8)   | 184(8)   | 12(6)    | 41(6)    | 16(7)    |
| C(3)  | 264(9)   | 203(8)   | 132(7)   | 33(6)    | 9(6)     | -35(7)   |
| C(4)  | 290(10)  | 284(9)   | 144(8)   | 1(7)     | 89(7)    | -66(8)   |
| C(5)  | 256(10)  | 383(11)  | 306(10)  | 75(8)    | 152(8)   | 75(8)    |
| C(6)  | 223(9)   | 327(10)  | 238(9)   | 102(7)   | 68(7)    | 57(7)    |
| C(7)  | 199(8)   | 223(9)   | 163(8)   | 21(6)    | 44(6)    | 15(7)    |
| C(8)  | 235(9)   | 202(8)   | 160(8)   | 18(6)    | 59(6)    | -21(7)   |
| C(9)  | 184(8)   | 200(8)   | 186(8)   | 19(6)    | 67(6)    | -3(7)    |
| C(10) | 251(10)  | 551(13)  | 403(11)  | 20(10)   | 34(8)    | -155(9)  |
| C(11) | 187(8)   | 318(10)  | 243(9)   | -6(7)    | -7(7)    | -2(7)    |
| C(12) | 220(10)  | 394(11)  | 383(11)  | -110(9)  | -21(8)   | -7(8)    |
| C(13) | 309(10)  | 307(10)  | 309(10)  | -2(8)    | 72(8)    | 100(8)   |
| C(14) | 246(9)   | 219(9)   | 217(8)   | 22(7)    | 31(7)    | 55(7)    |
| C(15) | 446(12)  | 338(11)  | 318(10)  | 112(8)   | 76(9)    | 182(9)   |
| C(16) | 417(12)  | 242(10)  | 372(11)  | -94(8)   | 179(9)   | -43(8)   |
| C(17) | 287(10)  | 189(9)   | 262(9)   | -36(7)   | 61(7)    | -16(7)   |
| C(18) | 524(13)  | 180(9)   | 367(11)  | -3(8)    | 152(9)   | 5(8)     |
| C(19) | 342(10)  | 282(10)  | 224(9)   | 28(7)    | -48(7)   | -40(8)   |
| C(20) | 239(9)   | 242(9)   | 243(9)   | 19(7)    | -2(7)    | -2(7)    |
| C(21) | 223(10)  | 494(12)  | 406(11)  | 54(9)    | 14(8)    | -54(9)   |
| C(22) | 316(10)  | 333(10)  | 198(9)   | 43(7)    | -13(7)   | 42(8)    |
| C(23) | 268(10)  | 282(10)  | 209(9)   | 44(7)    | 24(7)    | 61(7)    |
| C(24) | 268(10)  | 444(12)  | 392(11)  | 157(9)   | 70(8)    | 132(9)   |
| C(25) | 267(10)  | 215(9)   | 299(9)   | 6(7)     | 56(8)    | -66(7)   |
| C(26) | 199(9)   | 202(9)   | 220(8)   | -12(7)   | 35(7)    | -16(7)   |
| C(27) | 378(11)  | 235(9)   | 255(9)   | -61(7)   | 55(8)    | -21(8)   |
| C(28) | 179(8)   | 254(9)   | 155(8)   | 42(7)    | 42(6)    | 28(7)    |
| C(29) | 268(9)   | 209(9)   | 174(8)   | 46(7)    | 98(7)    | -9(7)    |
| C(30) | 358(11)  | 244(9)   | 261(9)   | 49(7)    | 139(8)   | 23(8)    |
| C(31) | 617(14)  | 187(9)   | 291(10)  | -18(8)   | 180(9)   | -17(9)   |
| C(32) | 580(14)  | 255(10)  | 207(9)   | -18(8)   | 53(9)    | -124(9)  |
| C(33) | 365(10)  | 282(10)  | 186(8)   | 59(7)    | 26(7)    | -94(8)   |
| C(34) | 271(9)   | 204(8)   | 154(8)   | 48(6)    | 72(7)    | -50(7)   |
| C(35) | 159(8)   | 232(9)   | 172(8)   | 39(7)    | 34(6)    | 8(7)     |
| C(36) | 212(8)   | 187(8)   | 125(7)   | -32(6)   | 51(6)    | -4(7)    |
| C(37) | 241(9)   | 223(9)   | 155(8)   | -16(7)   | 34(7)    | 12(7)    |
| C(38) | 349(10)  | 204(9)   | 201(9)   | 5(7)     | 99(7)    | -37(8)   |
| C(39) | 238(9)   | 278(9)   | 263(9)   | -38(7)   | 110(7)   | -72(7)   |
| C(40) | 200(9)   | 288(10)  | 214(8)   | -31(7)   | 50(7)    | 4(7)     |

C(41) 222(9) 205(8) 137(8) -34(6) 60(6) 11(7)

---

**Table 29. Crystal Data and Structure Analysis Details for [PhBP<sup>iPr</sup><sub>3</sub>]Mn(1-Ph(isoindolate)) (8).**

|                         |                                                                      |
|-------------------------|----------------------------------------------------------------------|
| Empirical formula       | C <sub>43</sub> H <sub>68</sub> BMnNO <sub>0.50</sub> P <sub>3</sub> |
| Formula weight          | 765.64                                                               |
| Crystallization solvent | Et <sub>2</sub> O                                                    |
| Crystal shape           | block                                                                |
| Crystal color           | dichroic orange red                                                  |
| Crystal size            | 0.25 x 0.26 x 0.37 mm                                                |

### Data Collection

|                                                                 |                                                                                                |
|-----------------------------------------------------------------|------------------------------------------------------------------------------------------------|
| Preliminary photograph(s)                                       | rotation                                                                                       |
| Type of diffractometer                                          | Bruker SMART 1000                                                                              |
| Wavelength                                                      | 0.71073 Å MoKα                                                                                 |
| Data collection temperature                                     | 98 K                                                                                           |
| Theta range for 26587 reflections used in lattice determination | 2.23 to 31.51°                                                                                 |
| Unit cell dimensions                                            | a = 19.6218(9) Å      α = 90°<br>b = 77.737(4) Å      β = 90°<br>c = 11.2629(6) Å      γ = 90° |
| Volume                                                          | 17179.8(15) Å <sup>3</sup>                                                                     |
| Z                                                               | 16                                                                                             |
| Crystal system                                                  | orthorhombic                                                                                   |
| Space group                                                     | Fdd2 (# 43)                                                                                    |
| Density (calculated)                                            | 1.184 g/cm <sup>3</sup>                                                                        |
| F(000)                                                          | 6592                                                                                           |
| Theta range for data collection                                 | 2.1 to 32.2°                                                                                   |
| Completeness to theta = 32.20°                                  | 91.4%                                                                                          |
| Index ranges                                                    | -29 ≤ h ≤ 29, -108 ≤ k ≤ 105, -16 ≤ l ≤ 16                                                     |
| Data collection scan type                                       | ω scans                                                                                        |
| Reflections collected                                           | 46858                                                                                          |
| Independent reflections                                         | 12898 [R <sub>int</sub> = 0.0724]                                                              |
| Reflections > 2σ(I)                                             | 9619                                                                                           |
| Average σ(I)/(net I)                                            | 0.0769                                                                                         |
| Absorption coefficient                                          | 0.45 mm <sup>-1</sup>                                                                          |
| Absorption correction                                           | none                                                                                           |
| Reflections monitored for decay                                 | initial data recollected at end                                                                |
| Decay of standards                                              | 0%                                                                                             |

**Table 29 (cont.)****Structure Solution and Refinement**

|                                                        |                                                                              |
|--------------------------------------------------------|------------------------------------------------------------------------------|
| Primary solution method                                | direct methods                                                               |
| Secondary solution method                              | difference map                                                               |
| Hydrogen placement                                     | calculated                                                                   |
| Refinement method                                      | Full-matrix least-squares on $F^2$                                           |
| Data / restraints / parameters                         | 12898 / 2 / 479                                                              |
| Treatment of hydrogen atoms                            | not refined, $U_{\text{iso}}$ fixed at 120% $U_{\text{eq}}$ of attached atom |
| Goodness-of-fit on $F^2$                               | 1.47                                                                         |
| Final R indices [ $I > 2\sigma(I)$ , 9619 reflections] | $R1 = 0.0514$ , $wR2 = 0.0731$                                               |
| R indices (all data)                                   | $R1 = 0.0747$ , $wR2 = 0.0755$                                               |
| Type of weighting scheme used                          | sigma                                                                        |
| Weighting scheme used                                  | calc $w=1/[\sigma^2(F_o^2)]$ where $P=(F_o^2+2F_c^2)/3$                      |
| Max shift/error                                        | 0.002                                                                        |
| Average shift/error                                    | 0.000                                                                        |
| Absolute structure parameter                           | -0.011(10)                                                                   |
| Largest diff. peak and hole                            | 1.02 and -0.78 $e \cdot \text{\AA}^{-3}$                                     |

**Programs Used**

|                      |                     |
|----------------------|---------------------|
| Cell refinement      | Bruker SMART 5.606  |
| Data collection      | Bruker SMART 5.054  |
| Data reduction       | Bruker SAINT 6.45   |
| Structure solution   | Bruker SHELXTL 6.14 |
| Structure refinement | Bruker SHELXTL 6.14 |

**Special Refinement Details**

Four bad reflections were omitted (040, 260, 220, 080). One half of an ether molecule was present in the asymmetric unit and was disordered in a few positions. The ether molecule was kept isotropic. The phenyl ring on the borate atom was badly disordered, and three different positions were found. The phenyl ring was kept isotropic as well.

Refinement of  $F^2$  against ALL reflections. The weighted R-factor ( $wR$ ) and goodness of fit ( $S$ ) are based on  $F^2$ , conventional R-factors ( $R$ ) are based on  $F$ , with  $F$  set to zero for negative  $F^2$ . The threshold expression of  $F^2 > 2\sigma(F^2)$  is used only for calculating R-factors(gt) etc. and is not relevant to the choice of reflections for refinement. R-factors based on  $F^2$  are statistically about twice as large as those based on  $F$ , and R-factors based on ALL data will be even larger.

All esds (except the esd in the dihedral angle between two l.s. planes) are estimated using the full covariance matrix. The cell esds are taken into account individually in the estimation of esds in distances, angles and torsion angles; correlations between esds in cell parameters are only used when they are defined by crystal symmetry. An approximate (isotropic) treatment of cell esds is used for estimating esds involving l.s. planes.

**Table 30. Atomic coordinates ( $\times 10^4$ ) and equivalent isotropic displacement parameters ( $\text{\AA}^2 \times 10^3$ ) for  $[\text{PhBP}^{i\text{Pr}}_3]\text{Mn}(\text{1-Ph(isoindolate)})$  (**8**).  $U(\text{eq})$  is defined as one third of the trace of the orthogonalized  $U_{ij}$  tensor.**

|       | x          | y          | z           | $U_{\text{eq}}$ |
|-------|------------|------------|-------------|-----------------|
| Mn    | 1595.9(2)  | 1761.8(1)  | 9777.4(3)   | 20.9(1)         |
| P(1)  | 2062.1(3)  | 2054.9(1)  | 10320.6(6)  | 29.6(2)         |
| P(2)  | 404.6(3)   | 1817.5(1)  | 10608.8(5)  | 22.0(1)         |
| P(3)  | 1220.4(3)  | 1881.6(1)  | 7752.0(5)   | 21.8(1)         |
| B     | 662.4(14)  | 2157.0(3)  | 9383(2)     | 27.4(6)         |
| N     | 2320.5(8)  | 1572.4(2)  | 9934.8(15)  | 21.9(4)         |
| C(1)  | 230.7(15)  | 2336.2(3)  | 9220(2)     | 42.3(7)         |
| C(2)  | 230(5)     | 2464.3(14) | 9981(12)    | 29(3)           |
| C(3)  | -126(3)    | 2617.8(9)  | 9846(9)     | 21.3(17)        |
| C(4)  | -513(6)    | 2649.5(12) | 8920(8)     | 36(3)           |
| C(5)  | -591(5)    | 2519.3(10) | 8064(8)     | 48(3)           |
| C(6)  | -253(4)    | 2361.9(9)  | 8186(7)     | 30(2)           |
| C(7)  | 1470.2(12) | 2212.2(3)  | 9693(2)     | 33.9(6)         |
| C(8)  | 293.1(11)  | 2049.0(3)  | 10493.1(19) | 26.3(5)         |
| C(9)  | 598.0(12)  | 2049.5(3)  | 8091(2)     | 25.8(5)         |
| C(10) | 3478.9(13) | 1993.7(3)  | 10230(2)    | 46.9(7)         |
| C(11) | 2914.5(12) | 2103.8(3)  | 9696(3)     | 40.6(6)         |
| C(12) | 3119.5(16) | 2292.0(4)  | 9641(4)     | 76.7(11)        |
| C(13) | 2452.0(14) | 1957.6(3)  | 12627(2)    | 40.4(6)         |
| C(14) | 2072.7(13) | 2096.8(3)  | 11943(2)    | 33.4(6)         |
| C(15) | 2321.1(16) | 2276.1(3)  | 12331(3)    | 58.9(8)         |
| C(16) | 687.1(13)  | 1807.5(3)  | 13029(2)    | 34.9(6)         |
| C(17) | 142.8(11)  | 1754.8(3)  | 12128.1(19) | 25.6(5)         |
| C(18) | -552.2(13) | 1822.3(3)  | 12507(2)    | 41.3(7)         |
| C(19) | -293.5(13) | 1520.9(3)  | 9874(2)     | 39.0(6)         |
| C(20) | -222.5(11) | 1714.2(3)  | 9592(2)     | 27.5(5)         |
| C(21) | -918.8(12) | 1800.7(3)  | 9439(2)     | 44.9(7)         |
| C(22) | 920.8(12)  | 1540.1(3)  | 7154(2)     | 32.4(5)         |
| C(23) | 857.1(12)  | 1722.2(3)  | 6673(2)     | 25.7(5)         |
| C(24) | 125.3(12)  | 1764.0(3)  | 6246(2)     | 31.5(6)         |
| C(25) | 2484.6(12) | 1884.4(3)  | 6573(2)     | 37.1(6)         |
| C(26) | 1864.5(11) | 1997.7(3)  | 6848(2)     | 26.8(5)         |
| C(27) | 1579.7(13) | 2075.0(3)  | 5697(2)     | 36.6(6)         |
| C(28) | 2820.0(12) | 1557.9(3)  | 9094(2)     | 25.3(5)         |
| C(29) | 3397.1(11) | 1479.9(2)  | 9564.9(19)  | 22.0(5)         |
| C(30) | 4035.9(11) | 1424.8(3)  | 9091(2)     | 29.9(6)         |
| C(31) | 4487.6(11) | 1343.8(3)  | 9826(2)     | 33.7(6)         |
| C(32) | 4340.8(12) | 1313.5(3)  | 11035(2)    | 30.1(6)         |
| C(33) | 3733.2(11) | 1362.2(3)  | 11520(2)    | 27.9(5)         |
| C(34) | 3247.8(11) | 1446.4(3)  | 10790(2)    | 22.8(5)         |
| C(35) | 2568.5(11) | 1503.8(3)  | 10979.2(19) | 21.1(5)         |
| C(36) | 2144.0(11) | 1472.3(2)  | 12013.5(18) | 21.0(5)         |
| C(37) | 2400.3(12) | 1483.2(3)  | 13176(2)    | 27.0(5)         |
| C(38) | 2009.4(12) | 1435.8(3)  | 14153(2)    | 32.2(6)         |
| C(39) | 1346.0(13) | 1378.3(3)  | 13995(2)    | 31.4(6)         |
| C(40) | 1076.1(12) | 1369.3(3)  | 12846(2)    | 29.4(5)         |

|        |            |            |             |          |
|--------|------------|------------|-------------|----------|
| C(41)  | 1466.0(11) | 1416.3(2)  | 11883.4(19) | 22.8(5)  |
| C(102) | 203(4)     | 2435.4(10) | 8279(7)     | 39(2)    |
| C(103) | -19(4)     | 2605.2(9)  | 8248(8)     | 38(2)    |
| C(104) | -86(8)     | 2696(2)    | 9329(15)    | 63(5)    |
| C(105) | 59(4)      | 2617.3(9)  | 10335(8)    | 29(2)    |
| C(106) | 302(6)     | 2450.9(14) | 10323(10)   | 35(3)    |
| C(112) | -502(5)    | 2316.3(11) | 8689(8)     | 36(2)    |
| C(113) | -892(4)    | 2464.5(10) | 8408(7)     | 29(2)    |
| C(114) | -702(4)    | 2619.6(11) | 8757(7)     | 16(2)    |
| C(115) | -94(7)     | 2651.4(19) | 9253(14)    | 36(4)    |
| C(116) | 328(5)     | 2489.7(12) | 9575(10)    | 37(3)    |
| O(1)   | 7500       | 2500       | 495(6)      | 19(2)    |
| C(42)  | 7935(9)    | 2405(2)    | 1609(17)    | 95(5)    |
| C(43)  | 8712(5)    | 2440.0(13) | 1808(10)    | 66(4)    |
| O(2)   | 7390(4)    | 2435.7(7)  | 1376(6)     | 70(2)    |
| C(44)  | 8037(3)    | 2432.7(6)  | 1139(5)     | 53.1(14) |
| C(45)  | 8451(4)    | 2315.1(9)  | 722(8)      | 131(3)   |

---

**Table 31. Bond lengths [ $\text{\AA}$ ] and angles [ $^\circ$ ] for  $[\text{PhBP}^{\text{iPr}}_3]\text{Mn}(\text{1-Ph}(\text{isoindolate}))$  (8).**

|              |           |              |          |
|--------------|-----------|--------------|----------|
| Mn-N         | 2.054(2)  | C(13)-H(13A) | 0.9800   |
| Mn-P(1)      | 2.5308(7) | C(13)-H(13B) | 0.9800   |
| Mn-P(2)      | 2.5550(7) | C(13)-H(13C) | 0.9800   |
| Mn-P(3)      | 2.5718(6) | C(14)-C(15)  | 1.540(3) |
| P(1)-C(7)    | 1.828(2)  | C(14)-H(14)  | 1.0000   |
| P(1)-C(11)   | 1.854(3)  | C(15)-H(15A) | 0.9800   |
| P(1)-C(14)   | 1.856(2)  | C(15)-H(15B) | 0.9800   |
| P(2)-C(8)    | 1.818(2)  | C(15)-H(15C) | 0.9800   |
| P(2)-C(17)   | 1.852(2)  | C(16)-C(17)  | 1.529(3) |
| P(2)-C(20)   | 1.863(2)  | C(16)-H(16A) | 0.9800   |
| P(3)-C(9)    | 1.828(2)  | C(16)-H(16B) | 0.9800   |
| P(3)-C(26)   | 1.857(2)  | C(16)-H(16C) | 0.9800   |
| P(3)-C(23)   | 1.876(2)  | C(17)-C(18)  | 1.522(3) |
| B-C(1)       | 1.640(4)  | C(17)-H(17)  | 1.0000   |
| B-C(8)       | 1.672(3)  | C(18)-H(18A) | 0.9800   |
| B-C(7)       | 1.679(4)  | C(18)-H(18B) | 0.9800   |
| B-C(9)       | 1.683(3)  | C(18)-H(18C) | 0.9800   |
| N-C(28)      | 1.368(3)  | C(19)-C(20)  | 1.542(3) |
| N-C(35)      | 1.380(3)  | C(19)-H(19A) | 0.9800   |
| C(1)-C(116)  | 1.272(9)  | C(19)-H(19B) | 0.9800   |
| C(1)-C(102)  | 1.312(8)  | C(19)-H(19C) | 0.9800   |
| C(1)-C(2)    | 1.313(11) | C(20)-C(21)  | 1.532(3) |
| C(1)-C(6)    | 1.517(7)  | C(20)-H(20)  | 1.0000   |
| C(1)-C(106)  | 1.535(11) | C(21)-H(21A) | 0.9800   |
| C(1)-C(112)  | 1.565(9)  | C(21)-H(21B) | 0.9800   |
| C(2)-C(3)    | 1.392(12) | C(21)-H(21C) | 0.9800   |
| C(2)-H(2)    | 0.9500    | C(22)-C(23)  | 1.521(3) |
| C(3)-C(4)    | 1.314(13) | C(22)-H(22A) | 0.9800   |
| C(3)-H(3)    | 0.9500    | C(22)-H(22B) | 0.9800   |
| C(4)-C(5)    | 1.406(12) | C(22)-H(22C) | 0.9800   |
| C(4)-H(4)    | 0.9500    | C(23)-C(24)  | 1.549(3) |
| C(5)-C(6)    | 1.398(10) | C(23)-H(23)  | 1.0000   |
| C(5)-H(5)    | 0.9500    | C(24)-H(24A) | 0.9800   |
| C(6)-H(6)    | 0.9500    | C(24)-H(24B) | 0.9800   |
| C(7)-H(7A)   | 0.9900    | C(24)-H(24C) | 0.9800   |
| C(7)-H(7B)   | 0.9900    | C(25)-C(26)  | 1.534(3) |
| C(8)-H(8A)   | 0.9900    | C(25)-H(25A) | 0.9800   |
| C(8)-H(8B)   | 0.9900    | C(25)-H(25B) | 0.9800   |
| C(9)-H(9A)   | 0.9900    | C(25)-H(25C) | 0.9800   |
| C(9)-H(9B)   | 0.9900    | C(26)-C(27)  | 1.535(3) |
| C(10)-C(11)  | 1.523(3)  | C(26)-H(26)  | 1.0000   |
| C(10)-H(10A) | 0.9800    | C(27)-H(27A) | 0.9800   |
| C(10)-H(10B) | 0.9800    | C(27)-H(27B) | 0.9800   |
| C(10)-H(10C) | 0.9800    | C(27)-H(27C) | 0.9800   |
| C(11)-C(12)  | 1.519(4)  | C(28)-C(29)  | 1.390(3) |
| C(11)-H(11)  | 1.0000    | C(28)-H(28)  | 0.9500   |
| C(12)-H(12A) | 0.9800    | C(29)-C(30)  | 1.428(3) |
| C(12)-H(12B) | 0.9800    | C(29)-C(34)  | 1.435(3) |
| C(12)-H(12C) | 0.9800    | C(30)-C(31)  | 1.366(3) |
| C(13)-C(14)  | 1.523(3)  | C(30)-H(30)  | 0.9500   |

|               |           |                    |            |
|---------------|-----------|--------------------|------------|
| C(31)-C(32)   | 1.412(4)  | C(44)-H(44A)       | 0.9387     |
| C(31)-H(31)   | 0.9500    | C(44)-H(44B)       | 1.0235     |
| C(32)-C(33)   | 1.365(3)  | C(45)-H(45A)       | 0.9800     |
| C(32)-H(32)   | 0.9500    | C(45)-H(45B)       | 0.9800     |
| C(33)-C(34)   | 1.418(3)  | C(45)-H(45C)       | 0.9800     |
| C(33)-H(33)   | 0.9500    |                    |            |
| C(34)-C(35)   | 1.422(3)  | N-Mn-P(1)          | 111.98(5)  |
| C(35)-C(36)   | 1.453(3)  | N-Mn-P(2)          | 136.31(5)  |
| C(36)-C(37)   | 1.405(3)  | P(1)-Mn-P(2)       | 95.13(2)   |
| C(36)-C(41)   | 1.408(3)  | N-Mn-P(3)          | 122.30(5)  |
| C(37)-C(38)   | 1.392(3)  | P(1)-Mn-P(3)       | 89.54(2)   |
| C(37)-H(37)   | 0.9500    | P(2)-Mn-P(3)       | 90.09(2)   |
| C(38)-C(39)   | 1.388(3)  | C(7)-P(1)-C(11)    | 106.85(11) |
| C(38)-H(38)   | 0.9500    | C(7)-P(1)-C(14)    | 105.68(11) |
| C(39)-C(40)   | 1.400(3)  | C(11)-P(1)-C(14)   | 109.12(13) |
| C(39)-H(39)   | 0.9500    | C(7)-P(1)-Mn       | 106.20(8)  |
| C(40)-C(41)   | 1.377(3)  | C(11)-P(1)-Mn      | 114.76(8)  |
| C(40)-H(40)   | 0.9500    | C(14)-P(1)-Mn      | 113.57(7)  |
| C(41)-H(41)   | 0.9500    | C(8)-P(2)-C(17)    | 107.07(10) |
| C(102)-C(103) | 1.390(10) | C(8)-P(2)-C(20)    | 107.65(10) |
| C(102)-H(102) | 0.9500    | C(17)-P(2)-C(20)   | 105.73(10) |
| C(103)-C(104) | 1.413(19) | C(8)-P(2)-Mn       | 104.58(7)  |
| C(103)-H(103) | 0.9500    | C(17)-P(2)-Mn      | 123.22(7)  |
| C(104)-C(105) | 1.32(2)   | C(20)-P(2)-Mn      | 107.83(7)  |
| C(104)-H(104) | 0.9500    | C(9)-P(3)-C(26)    | 102.82(10) |
| C(105)-C(106) | 1.378(13) | C(9)-P(3)-C(23)    | 110.66(10) |
| C(105)-H(105) | 0.9500    | C(26)-P(3)-C(23)   | 102.98(10) |
| C(106)-H(106) | 0.9500    | C(9)-P(3)-Mn       | 105.36(8)  |
| C(112)-C(113) | 1.419(11) | C(26)-P(3)-Mn      | 117.85(7)  |
| C(112)-H(112) | 0.9500    | C(23)-P(3)-Mn      | 116.39(7)  |
| C(113)-C(114) | 1.322(11) | C(1)-B-C(8)        | 106.62(19) |
| C(113)-H(113) | 0.9500    | C(1)-B-C(7)        | 107.10(19) |
| C(114)-C(115) | 1.340(17) | C(8)-B-C(7)        | 112.43(19) |
| C(114)-H(114) | 0.9500    | C(1)-B-C(9)        | 106.67(19) |
| C(115)-C(116) | 1.548(18) | C(8)-B-C(9)        | 111.39(18) |
| C(115)-H(115) | 0.9500    | C(7)-B-C(9)        | 112.21(19) |
| C(116)-H(116) | 0.9500    | C(28)-N-C(35)      | 107.77(17) |
| O(1)-C(42)    | 1.687(18) | C(28)-N-Mn         | 119.71(14) |
| O(1)-C(42)#1  | 1.687(18) | C(35)-N-Mn         | 126.49(14) |
| O(1)-H(44B)   | 1.1424    | C(116)-C(1)-C(102) | 73.1(6)    |
| C(42)-C(43)   | 1.565(19) | C(116)-C(1)-C(2)   | 23.7(6)    |
| C(42)-H(42A)  | 0.9900    | C(102)-C(1)-C(2)   | 94.7(7)    |
| C(42)-H(42B)  | 0.9900    | C(116)-C(1)-C(6)   | 102.2(6)   |
| C(42)-H(44A)  | 0.9180    | C(102)-C(1)-C(6)   | 43.6(4)    |
| C(42)-H(44B)  | 1.5880    | C(2)-C(1)-C(6)     | 113.6(6)   |
| C(43)-H(43A)  | 0.9800    | C(116)-C(1)-C(106) | 35.7(7)    |
| C(43)-H(43B)  | 0.9800    | C(102)-C(1)-C(106) | 108.4(6)   |
| C(43)-H(43C)  | 0.9800    | C(2)-C(1)-C(106)   | 14.6(7)    |
| C(43)-H(44A)  | 0.9301    | C(6)-C(1)-C(106)   | 127.0(5)   |
| O(2)-O(2)#1   | 1.088(11) | C(116)-C(1)-C(112) | 110.5(6)   |
| O(2)-C(44)    | 1.296(9)  | C(102)-C(1)-C(112) | 73.2(5)    |
| O(2)-C(44)#1  | 1.350(8)  | C(2)-C(1)-C(112)   | 108.9(6)   |
| C(44)-C(45)   | 1.310(8)  | C(6)-C(1)-C(112)   | 31.1(3)    |
| C(44)-O(2)#1  | 1.349(8)  | C(106)-C(1)-C(112) | 116.7(6)   |



|                     |            |                     |            |
|---------------------|------------|---------------------|------------|
| C(116)-C(1)-B       | 133.1(5)   | C(11)-C(12)-H(12C)  | 109.5      |
| C(102)-C(1)-B       | 127.6(4)   | H(12A)-C(12)-H(12C) | 109.5      |
| C(2)-C(1)-B         | 124.9(6)   | H(12B)-C(12)-H(12C) | 109.5      |
| C(6)-C(1)-B         | 121.4(3)   | C(14)-C(13)-H(13A)  | 109.5      |
| C(106)-C(1)-B       | 110.9(5)   | C(14)-C(13)-H(13B)  | 109.5      |
| C(112)-C(1)-B       | 115.6(4)   | H(13A)-C(13)-H(13B) | 109.5      |
| C(1)-C(2)-C(3)      | 125.4(10)  | C(14)-C(13)-H(13C)  | 109.5      |
| C(1)-C(2)-H(2)      | 117.3      | H(13A)-C(13)-H(13C) | 109.5      |
| C(3)-C(2)-H(2)      | 117.3      | H(13B)-C(13)-H(13C) | 109.5      |
| C(4)-C(3)-C(2)      | 122.5(9)   | C(13)-C(14)-C(15)   | 110.2(2)   |
| C(4)-C(3)-H(3)      | 118.7      | C(13)-C(14)-P(1)    | 112.29(16) |
| C(2)-C(3)-H(3)      | 118.7      | C(15)-C(14)-P(1)    | 116.22(18) |
| C(3)-C(4)-C(5)      | 118.2(9)   | C(13)-C(14)-H(14)   | 105.8      |
| C(3)-C(4)-H(4)      | 120.9      | C(15)-C(14)-H(14)   | 105.8      |
| C(5)-C(4)-H(4)      | 120.9      | P(1)-C(14)-H(14)    | 105.8      |
| C(6)-C(5)-C(4)      | 120.8(8)   | C(14)-C(15)-H(15A)  | 109.5      |
| C(6)-C(5)-H(5)      | 119.6      | C(14)-C(15)-H(15B)  | 109.5      |
| C(4)-C(5)-H(5)      | 119.6      | H(15A)-C(15)-H(15B) | 109.5      |
| C(5)-C(6)-C(1)      | 119.2(6)   | C(14)-C(15)-H(15C)  | 109.5      |
| C(5)-C(6)-H(6)      | 120.4      | H(15A)-C(15)-H(15C) | 109.5      |
| C(1)-C(6)-H(6)      | 120.4      | H(15B)-C(15)-H(15C) | 109.5      |
| B-C(7)-P(1)         | 120.65(14) | C(17)-C(16)-H(16A)  | 109.5      |
| B-C(7)-H(7A)        | 107.2      | C(17)-C(16)-H(16B)  | 109.5      |
| P(1)-C(7)-H(7A)     | 107.2      | H(16A)-C(16)-H(16B) | 109.5      |
| B-C(7)-H(7B)        | 107.2      | C(17)-C(16)-H(16C)  | 109.5      |
| P(1)-C(7)-H(7B)     | 107.2      | H(16A)-C(16)-H(16C) | 109.5      |
| H(7A)-C(7)-H(7B)    | 106.8      | H(16B)-C(16)-H(16C) | 109.5      |
| B-C(8)-P(2)         | 119.92(15) | C(18)-C(17)-C(16)   | 110.32(19) |
| B-C(8)-H(8A)        | 107.3      | C(18)-C(17)-P(2)    | 114.62(16) |
| P(2)-C(8)-H(8A)     | 107.3      | C(16)-C(17)-P(2)    | 110.42(16) |
| B-C(8)-H(8B)        | 107.3      | C(18)-C(17)-H(17)   | 107.0      |
| P(2)-C(8)-H(8B)     | 107.3      | C(16)-C(17)-H(17)   | 107.0      |
| H(8A)-C(8)-H(8B)    | 106.9      | P(2)-C(17)-H(17)    | 107.0      |
| B-C(9)-P(3)         | 119.02(16) | C(17)-C(18)-H(18A)  | 109.5      |
| B-C(9)-H(9A)        | 107.6      | C(17)-C(18)-H(18B)  | 109.5      |
| P(3)-C(9)-H(9A)     | 107.6      | H(18A)-C(18)-H(18B) | 109.5      |
| B-C(9)-H(9B)        | 107.6      | C(17)-C(18)-H(18C)  | 109.5      |
| P(3)-C(9)-H(9B)     | 107.6      | H(18A)-C(18)-H(18C) | 109.5      |
| H(9A)-C(9)-H(9B)    | 107.0      | H(18B)-C(18)-H(18C) | 109.5      |
| C(11)-C(10)-H(10A)  | 109.5      | C(20)-C(19)-H(19A)  | 109.5      |
| C(11)-C(10)-H(10B)  | 109.5      | C(20)-C(19)-H(19B)  | 109.5      |
| H(10A)-C(10)-H(10B) | 109.5      | H(19A)-C(19)-H(19B) | 109.5      |
| C(11)-C(10)-H(10C)  | 109.5      | C(20)-C(19)-H(19C)  | 109.5      |
| H(10A)-C(10)-H(10C) | 109.5      | H(19A)-C(19)-H(19C) | 109.5      |
| H(10B)-C(10)-H(10C) | 109.5      | H(19B)-C(19)-H(19C) | 109.5      |
| C(12)-C(11)-C(10)   | 111.4(2)   | C(21)-C(20)-C(19)   | 111.71(19) |
| C(12)-C(11)-P(1)    | 116.85(19) | C(21)-C(20)-P(2)    | 117.98(16) |
| C(10)-C(11)-P(1)    | 113.03(18) | C(19)-C(20)-P(2)    | 110.70(15) |
| C(12)-C(11)-H(11)   | 104.7      | C(21)-C(20)-H(20)   | 105.1      |
| C(10)-C(11)-H(11)   | 104.7      | C(19)-C(20)-H(20)   | 105.1      |
| P(1)-C(11)-H(11)    | 104.7      | P(2)-C(20)-H(20)    | 105.1      |
| C(11)-C(12)-H(12A)  | 109.5      | C(20)-C(21)-H(21A)  | 109.5      |
| C(11)-C(12)-H(12B)  | 109.5      | C(20)-C(21)-H(21B)  | 109.5      |
| H(12A)-C(12)-H(12B) | 109.5      | H(21A)-C(21)-H(21B) | 109.5      |

|                     |            |                      |            |
|---------------------|------------|----------------------|------------|
| C(20)-C(21)-H(21C)  | 109.5      | C(32)-C(33)-C(34)    | 118.8(2)   |
| H(21A)-C(21)-H(21C) | 109.5      | C(32)-C(33)-H(33)    | 120.6      |
| H(21B)-C(21)-H(21C) | 109.5      | C(34)-C(33)-H(33)    | 120.6      |
| C(23)-C(22)-H(22A)  | 109.5      | C(33)-C(34)-C(35)    | 133.4(2)   |
| C(23)-C(22)-H(22B)  | 109.5      | C(33)-C(34)-C(29)    | 120.3(2)   |
| H(22A)-C(22)-H(22B) | 109.5      | C(35)-C(34)-C(29)    | 106.17(19) |
| C(23)-C(22)-H(22C)  | 109.5      | N-C(35)-C(34)        | 108.93(19) |
| H(22A)-C(22)-H(22C) | 109.5      | N-C(35)-C(36)        | 123.10(19) |
| H(22B)-C(22)-H(22C) | 109.5      | C(34)-C(35)-C(36)    | 127.22(19) |
| C(22)-C(23)-C(24)   | 112.45(19) | C(37)-C(36)-C(41)    | 117.01(19) |
| C(22)-C(23)-P(3)    | 110.65(16) | C(37)-C(36)-C(35)    | 122.12(19) |
| C(24)-C(23)-P(3)    | 114.53(15) | C(41)-C(36)-C(35)    | 120.70(19) |
| C(22)-C(23)-H(23)   | 106.2      | C(38)-C(37)-C(36)    | 121.6(2)   |
| C(24)-C(23)-H(23)   | 106.2      | C(38)-C(37)-H(37)    | 119.2      |
| P(3)-C(23)-H(23)    | 106.2      | C(36)-C(37)-H(37)    | 119.2      |
| C(23)-C(24)-H(24A)  | 109.5      | C(39)-C(38)-C(37)    | 120.1(2)   |
| C(23)-C(24)-H(24B)  | 109.5      | C(39)-C(38)-H(38)    | 120.0      |
| H(24A)-C(24)-H(24B) | 109.5      | C(37)-C(38)-H(38)    | 120.0      |
| C(23)-C(24)-H(24C)  | 109.5      | C(38)-C(39)-C(40)    | 119.3(2)   |
| H(24A)-C(24)-H(24C) | 109.5      | C(38)-C(39)-H(39)    | 120.4      |
| H(24B)-C(24)-H(24C) | 109.5      | C(40)-C(39)-H(39)    | 120.4      |
| C(26)-C(25)-H(25A)  | 109.5      | C(41)-C(40)-C(39)    | 120.3(2)   |
| C(26)-C(25)-H(25B)  | 109.5      | C(41)-C(40)-H(40)    | 119.8      |
| H(25A)-C(25)-H(25B) | 109.5      | C(39)-C(40)-H(40)    | 119.8      |
| C(26)-C(25)-H(25C)  | 109.5      | C(40)-C(41)-C(36)    | 121.7(2)   |
| H(25A)-C(25)-H(25C) | 109.5      | C(40)-C(41)-H(41)    | 119.2      |
| H(25B)-C(25)-H(25C) | 109.5      | C(36)-C(41)-H(41)    | 119.2      |
| C(25)-C(26)-C(27)   | 110.04(19) | C(1)-C(102)-C(103)   | 126.3(7)   |
| C(25)-C(26)-P(3)    | 111.81(15) | C(1)-C(102)-H(102)   | 116.9      |
| C(27)-C(26)-P(3)    | 113.93(16) | C(103)-C(102)-H(102) | 116.9      |
| C(25)-C(26)-H(26)   | 106.9      | C(102)-C(103)-C(104) | 118.7(10)  |
| C(27)-C(26)-H(26)   | 106.9      | C(102)-C(103)-H(103) | 120.6      |
| P(3)-C(26)-H(26)    | 106.9      | C(104)-C(103)-H(103) | 120.6      |
| C(26)-C(27)-H(27A)  | 109.5      | C(105)-C(104)-C(103) | 119.3(14)  |
| C(26)-C(27)-H(27B)  | 109.5      | C(105)-C(104)-H(104) | 120.3      |
| H(27A)-C(27)-H(27B) | 109.5      | C(103)-C(104)-H(104) | 120.3      |
| C(26)-C(27)-H(27C)  | 109.5      | C(104)-C(105)-C(106) | 120.1(11)  |
| H(27A)-C(27)-H(27C) | 109.5      | C(104)-C(105)-H(105) | 120.0      |
| H(27B)-C(27)-H(27C) | 109.5      | C(106)-C(105)-H(105) | 120.0      |
| N-C(28)-C(29)       | 110.85(19) | C(105)-C(106)-C(1)   | 121.4(9)   |
| N-C(28)-H(28)       | 124.6      | C(105)-C(106)-H(106) | 119.3      |
| C(29)-C(28)-H(28)   | 124.6      | C(1)-C(106)-H(106)   | 119.3      |
| C(28)-C(29)-C(30)   | 134.7(2)   | C(113)-C(112)-C(1)   | 120.0(7)   |
| C(28)-C(29)-C(34)   | 106.26(19) | C(113)-C(112)-H(112) | 120.0      |
| C(30)-C(29)-C(34)   | 119.0(2)   | C(1)-C(112)-H(112)   | 120.0      |
| C(31)-C(30)-C(29)   | 118.8(2)   | C(114)-C(113)-C(112) | 121.4(8)   |
| C(31)-C(30)-H(30)   | 120.6      | C(114)-C(113)-H(113) | 119.3      |
| C(29)-C(30)-H(30)   | 120.6      | C(112)-C(113)-H(113) | 119.3      |
| C(30)-C(31)-C(32)   | 121.9(2)   | C(113)-C(114)-C(115) | 123.0(9)   |
| C(30)-C(31)-H(31)   | 119.0      | C(113)-C(114)-H(114) | 118.5      |
| C(32)-C(31)-H(31)   | 119.0      | C(115)-C(114)-H(114) | 118.5      |
| C(33)-C(32)-C(31)   | 121.2(2)   | C(114)-C(115)-C(116) | 115.1(11)  |
| C(33)-C(32)-H(32)   | 119.4      | C(114)-C(115)-H(115) | 122.5      |
| C(31)-C(32)-H(32)   | 119.4      | C(116)-C(115)-H(115) | 122.5      |

|                      |           |                     |          |
|----------------------|-----------|---------------------|----------|
| C(1)-C(116)-C(115)   | 127.4(10) | H(43A)-C(43)-H(44A) | 102.7    |
| C(1)-C(116)-H(116)   | 116.3     | H(43B)-C(43)-H(44A) | 138.0    |
| C(115)-C(116)-H(116) | 116.3     | H(43C)-C(43)-H(44A) | 83.5     |
| C(42)-O(1)-C(42)#1   | 83.9(13)  | O(2)#1-O(2)-C(44)   | 68.3(7)  |
| C(42)-O(1)-H(44B)    | 65.0      | O(2)#1-O(2)-C(44)#1 | 63.2(7)  |
| C(42)#1-O(1)-H(44B)  | 115.3     | C(44)-O(2)-C(44)#1  | 125.5(6) |
| C(43)-C(42)-O(1)     | 121.6(12) | O(2)-C(44)-C(45)    | 133.8(6) |
| C(43)-C(42)-H(42A)   | 106.9     | O(2)-C(44)-O(2)#1   | 48.5(5)  |
| O(1)-C(42)-H(42A)    | 106.9     | C(45)-C(44)-O(2)#1  | 170.2(7) |
| C(43)-C(42)-H(42B)   | 106.9     | O(2)-C(44)-H(44A)   | 108.3    |
| O(1)-C(42)-H(42B)    | 106.9     | C(45)-C(44)-H(44A)  | 105.3    |
| H(42A)-C(42)-H(42B)  | 106.7     | O(2)#1-C(44)-H(44A) | 80.4     |
| C(43)-C(42)-H(44A)   | 32.4      | O(2)-C(44)-H(44B)   | 101.7    |
| O(1)-C(42)-H(44A)    | 103.0     | C(45)-C(44)-H(44B)  | 100.9    |
| H(42A)-C(42)-H(44A)  | 90.1      | O(2)#1-C(44)-H(44B) | 69.8     |
| H(42B)-C(42)-H(44A)  | 139.2     | H(44A)-C(44)-H(44B) | 102.4    |
| C(43)-C(42)-H(44B)   | 81.1      | C(44)-C(45)-H(45A)  | 109.5    |
| O(1)-C(42)-H(44B)    | 40.7      | C(44)-C(45)-H(45B)  | 109.5    |
| H(42A)-C(42)-H(44B)  | 127.8     | H(45A)-C(45)-H(45B) | 109.5    |
| H(42B)-C(42)-H(44B)  | 120.2     | C(44)-C(45)-H(45C)  | 109.5    |
| H(44A)-C(42)-H(44B)  | 69.4      | H(45A)-C(45)-H(45C) | 109.5    |
| C(42)-C(43)-H(44A)   | 31.9      | H(45B)-C(45)-H(45C) | 109.5    |

---

Symmetry transformations used to generate equivalent atoms:

#1  $-x+3/2, -y+1/2, z$

**Table 32. Anisotropic displacement parameters ( $\text{\AA}^2 \times 10^4$ ) for  $[\text{PhBP}^{\text{iPr}}_3]\text{Mn}(\text{1-Ph(isoindolate)})$  (8). The anisotropic displacement factor exponent takes the form:  $-2\pi^2[\text{h}^2\text{a}^*^2\text{U}^{11} + \dots + 2\text{hka}^*\text{b}^*\text{U}^{12}]$**

|       | $\text{U}^{11}$ | $\text{U}^{22}$ | $\text{U}^{33}$ | $\text{U}^{23}$ | $\text{U}^{13}$ | $\text{U}^{12}$ |
|-------|-----------------|-----------------|-----------------|-----------------|-----------------|-----------------|
| Mn    | 223(2)          | 211(2)          | 194(2)          | -1(1)           | -1(2)           | 20(1)           |
| P(1)  | 326(4)          | 246(3)          | 317(4)          | -28(3)          | -11(3)          | -41(3)          |
| P(2)  | 234(3)          | 221(3)          | 206(3)          | -1(2)           | 26(2)           | 16(3)           |
| P(3)  | 225(3)          | 237(3)          | 192(3)          | 16(2)           | 28(2)           | 23(2)           |
| B     | 328(16)         | 242(14)         | 253(15)         | -8(11)          | 40(12)          | 6(12)           |
| N     | 225(10)         | 229(9)          | 203(10)         | -3(8)           | 20(8)           | 21(7)           |
| C(1)  | 670(20)         | 321(15)         | 281(14)         | 88(12)          | 187(13)         | 228(13)         |
| C(7)  | 505(16)         | 183(11)         | 329(14)         | -2(11)          | 36(13)          | -38(10)         |
| C(8)  | 300(13)         | 265(12)         | 224(12)         | -9(10)          | 0(10)           | 59(10)          |
| C(9)  | 289(13)         | 235(12)         | 251(13)         | 68(10)          | 22(10)          | 16(10)          |
| C(10) | 367(16)         | 609(17)         | 429(17)         | -154(13)        | 31(13)          | -66(13)         |
| C(11) | 364(15)         | 428(15)         | 425(16)         | 7(12)           | 40(14)          | -25(12)         |
| C(12) | 480(20)         | 551(19)         | 1270(30)        | 120(20)         | 200(20)         | -174(15)        |
| C(13) | 468(17)         | 445(15)         | 301(15)         | -45(11)         | 2(12)           | -40(13)         |
| C(14) | 425(16)         | 265(13)         | 310(14)         | -32(10)         | -22(11)         | -51(11)         |
| C(15) | 950(20)         | 402(16)         | 417(17)         | -107(14)        | -118(18)        | -134(15)        |
| C(16) | 516(17)         | 341(14)         | 190(13)         | -18(11)         | 43(12)          | -20(12)         |
| C(17) | 291(13)         | 252(12)         | 225(13)         | 34(10)          | 59(10)          | 47(10)          |
| C(18) | 412(16)         | 479(15)         | 348(16)         | 78(12)          | 172(12)         | 118(12)         |
| C(19) | 435(16)         | 375(14)         | 360(15)         | -9(12)          | -34(13)         | -136(12)        |
| C(20) | 238(12)         | 332(13)         | 255(13)         | -16(10)         | -15(10)         | -1(10)          |
| C(21) | 264(14)         | 705(19)         | 379(17)         | -31(13)         | -24(12)         | 80(13)          |
| C(22) | 354(14)         | 327(13)         | 291(14)         | -106(11)        | -18(11)         | -22(11)         |
| C(23) | 263(13)         | 310(13)         | 198(12)         | -38(10)         | 32(10)          | 8(10)           |
| C(24) | 336(14)         | 364(14)         | 246(13)         | -19(10)         | -39(11)         | 4(11)           |
| C(25) | 295(14)         | 421(15)         | 396(16)         | 89(12)          | 117(12)         | 52(12)          |
| C(26) | 242(13)         | 322(13)         | 239(13)         | 57(10)          | 26(10)          | -4(10)          |
| C(27) | 368(15)         | 431(15)         | 298(15)         | 139(12)         | 98(12)          | -7(12)          |
| C(28) | 320(14)         | 219(12)         | 221(12)         | 16(9)           | 50(10)          | -3(10)          |
| C(29) | 228(12)         | 168(11)         | 266(14)         | -25(9)          | 55(10)          | -18(9)          |
| C(30) | 285(14)         | 242(13)         | 369(14)         | -21(10)         | 111(12)         | -53(11)         |
| C(31) | 187(12)         | 299(13)         | 525(17)         | -13(12)         | 84(13)          | -20(10)         |
| C(32) | 217(13)         | 233(13)         | 454(16)         | 15(11)          | -10(11)         | 5(10)           |
| C(33) | 229(13)         | 292(13)         | 316(14)         | 31(10)          | 23(11)          | -31(10)         |
| C(34) | 208(12)         | 173(11)         | 305(14)         | -3(9)           | 3(10)           | -11(9)          |
| C(35) | 215(12)         | 188(12)         | 230(12)         | 3(9)            | 15(9)           | 46(9)           |
| C(36) | 227(12)         | 191(11)         | 212(12)         | 10(9)           | 11(9)           | 31(9)           |
| C(37) | 224(12)         | 316(13)         | 270(14)         | -15(10)         | 5(10)           | 12(10)          |
| C(38) | 370(16)         | 368(14)         | 229(13)         | 30(11)          | 10(11)          | 68(12)          |
| C(39) | 274(14)         | 360(14)         | 309(15)         | 66(11)          | 70(11)          | 75(11)          |
| C(40) | 233(13)         | 304(13)         | 345(14)         | 33(10)          | 57(11)          | 21(10)          |
| C(41) | 255(13)         | 225(11)         | 204(12)         | -7(9)           | -18(9)          | 49(10)          |

**Table 33. Crystal Data and Structure Analysis Details for [PhBP<sup>i</sup>Pr<sub>3</sub>]TiMnBr(CO)<sub>4</sub> (9).**

|                         |                                                                       |
|-------------------------|-----------------------------------------------------------------------|
| Empirical formula       | C <sub>31</sub> H <sub>53</sub> BBrMnO <sub>4</sub> P <sub>3</sub> Ti |
| Formula weight          | 932.67                                                                |
| Crystallization solvent | benzene/petroleum ether                                               |
| Crystal shape           | thick plate                                                           |
| Crystal color           | yellow                                                                |
| Crystal size            | 0.17 x 0.30 x 0.33 mm                                                 |

### Data Collection

|                                                                 |                                                          |                                       |
|-----------------------------------------------------------------|----------------------------------------------------------|---------------------------------------|
| Preliminary photograph(s)                                       | rotation                                                 |                                       |
| Type of diffractometer                                          | Bruker SMART 1000                                        |                                       |
| Wavelength                                                      | 0.71073 Å MoKα                                           |                                       |
| Data collection temperature                                     | 100 K                                                    |                                       |
| Theta range for 48690 reflections used in lattice determination | 2.42 to 34.7°                                            |                                       |
| Unit cell dimensions                                            | a = 10.2574(5) Å<br>b = 18.6613(8) Å<br>c = 19.9243(9) Å | α = 90°<br>β = 100.590(1)°<br>γ = 90° |
| Volume                                                          | 3748.9(3) Å <sup>3</sup>                                 |                                       |
| Z                                                               | 4                                                        |                                       |
| Crystal system                                                  | monoclinic                                               |                                       |
| Space group                                                     | P 21/n (# 14)                                            |                                       |
| Density (calculated)                                            | 1.652 g/cm <sup>3</sup>                                  |                                       |
| F(000)                                                          | 1848                                                     |                                       |
| Theta range for data collection                                 | 1.5 to 34.7°                                             |                                       |
| Completeness to theta = 34.66°                                  | 94.8%                                                    |                                       |
| Index ranges                                                    | -16 ≤ h ≤ 16, -29 ≤ k ≤ 29, -29 ≤ l ≤ 31                 |                                       |
| Data collection scan type                                       | ω scans                                                  |                                       |
| Reflections collected                                           | 86733                                                    |                                       |
| Independent reflections                                         | 15253 [R <sub>int</sub> = 0.0519]                        |                                       |
| Reflections > 2σ(I)                                             | 11838                                                    |                                       |
| Average σ(I)/(net I)                                            | 0.0460                                                   |                                       |
| Absorption coefficient                                          | 5.86 mm <sup>-1</sup>                                    |                                       |
| Absorption correction                                           | Semi-empirical from equivalents                          |                                       |
| Max. and min. transmission                                      | 0.370 and 0.161                                          |                                       |
| Reflections monitored for decay                                 | initial data recollected                                 |                                       |

Decay of standards 0%

## Structure Solution and Refinement

|                                                         |                                                                              |
|---------------------------------------------------------|------------------------------------------------------------------------------|
| Primary solution method                                 | direct methods                                                               |
| Secondary solution method                               | difference map                                                               |
| Hydrogen placement                                      | calculated                                                                   |
| Refinement method                                       | Full-matrix least-squares on $F^2$                                           |
| Data / restraints / parameters                          | 15253 / 0 / 392                                                              |
| Treatment of hydrogen atoms                             | not refined, $U_{\text{iso}}$ fixed at 120% $U_{\text{eq}}$ of attached atom |
| Goodness-of-fit on $F^2$                                | 1.55                                                                         |
| Final R indices [ $I > 2\sigma(I)$ , 11838 reflections] | $R1 = 0.0355$ , $wR2 = 0.0532$                                               |
| R indices (all data)                                    | $R1 = 0.0570$ , $wR2 = 0.0555$                                               |
| Type of weighting scheme used                           | sigma                                                                        |
| Weighting scheme used                                   | calc $w=1/[\sigma^2(F_o^2)]$ where $P=(F_o^2+2F_c^2)/3$                      |
| Max shift/error                                         | 0.002                                                                        |
| Average shift/error                                     | 0.000                                                                        |
| Largest diff. peak and hole                             | 3.81 and $-1.85 \text{ e} \cdot \text{\AA}^{-3}$                             |

## Programs Used

|                      |                     |
|----------------------|---------------------|
| Cell refinement      | Bruker SMART 5.606  |
| Data collection      | Bruker SMART 5.054  |
| Data reduction       | Bruker SAINT 6.45   |
| Structure solution   | Bruker SHELXTL 6.14 |
| Structure refinement | Bruker SHELXTL 6.14 |

## Special Refinement Details

An absorption correction was applied using SADABS.

Refinement of  $F^2$  against ALL reflections. The weighted R-factor ( $wR$ ) and goodness of fit ( $S$ ) are based on  $F^2$ , conventional R-factors ( $R$ ) are based on  $F$ , with  $F$  set to zero for negative  $F^2$ . The threshold expression of  $F^2 > 2\sigma(F^2)$  is used only for calculating R-factors(gt) etc. and is not relevant to the choice of reflections for refinement. R-factors based on  $F^2$  are statistically about twice as large as those based on  $F$ , and R-factors based on ALL data will be even larger.

All esds (except the esd in the dihedral angle between two l.s. planes) are estimated using the full covariance matrix. The cell esds are taken into account individually in the estimation of esds in distances, angles and torsion angles; correlations between esds in cell parameters are only used when they are defined by crystal symmetry. An approximate (isotropic) treatment of cell esds is used for estimating esds involving l.s. planes.

**Table 34. Atomic coordinates ( $\times 10^4$ ) and equivalent isotropic displacement parameters ( $\text{\AA}^2 \times 10^3$ ) for  $[\text{PhBP}^{i\text{Pr}}_3]\text{TiMnBr}(\text{CO})_4$  (**9**).  $U(\text{eq})$  is defined as one third of the trace of the orthogonalized  $U_{ij}$  tensor.**

|       | x          | y           | z          | $U_{\text{eq}}$ |
|-------|------------|-------------|------------|-----------------|
| Mn    | 1707.4(3)  | -951.4(2)   | 1144.9(2)  | 14.9(1)         |
| P(1)  | 5960.8(6)  | -798.2(3)   | 2509.3(3)  | 13.2(1)         |
| P(2)  | 4804.9(6)  | 1013.3(3)   | 1847.1(3)  | 13.3(1)         |
| P(3)  | 3566.4(6)  | 217.9(3)    | 3266.9(3)  | 15.2(1)         |
| B     | 6431(3)    | 623.6(13)   | 3214.4(13) | 13.4(5)         |
| Br    | 1750.7(2)  | -1825.9(1)  | 2118.9(1)  | 21.9(1)         |
| Ti    | 3561.7(1)  | -239.5(1)   | 1980.2(1)  | 13.5(1)         |
| O(1)  | 3870.6(19) | -1852.6(9)  | 771.3(10)  | 28.7(4)         |
| O(2)  | 1703.1(19) | 17.9(10)    | -21.8(10)  | 29.3(4)         |
| O(3)  | -222.2(18) | -5.5(10)    | 1687.0(11) | 29.7(4)         |
| O(4)  | -403(2)    | -1867.5(10) | 368.9(11)  | 37.8(5)         |
| C(1)  | 7613(2)    | 980.7(11)   | 3781.9(12) | 13.8(4)         |
| C(2)  | 8692(2)    | 600.6(12)   | 4141.8(13) | 19.9(5)         |
| C(3)  | 9658(2)    | 903.4(13)   | 4639.4(13) | 22.2(5)         |
| C(4)  | 9580(3)    | 1619.1(13)  | 4802.8(13) | 21.0(5)         |
| C(5)  | 8513(3)    | 2011.7(13)  | 4475.8(14) | 29.3(6)         |
| C(6)  | 7559(3)    | 1700.9(12)  | 3980.7(13) | 24.6(6)         |
| C(7)  | 7055(2)    | -56.2(11)   | 2821.6(12) | 14.0(4)         |
| C(8)  | 5857(2)    | 1264.9(11)  | 2653.6(11) | 13.5(4)         |
| C(9)  | 5292(2)    | 362.1(11)   | 3671.3(12) | 14.8(5)         |
| C(10) | 5354(3)    | -2137.8(12) | 3008.8(14) | 25.1(6)         |
| C(11) | 5858(2)    | -1391.1(11) | 3248.2(13) | 17.8(5)         |
| C(12) | 7106(3)    | -1426.9(13) | 3811.9(13) | 23.2(5)         |
| C(13) | 6754(3)    | -954.8(13)  | 1244.2(13) | 21.2(5)         |
| C(14) | 6730(2)    | -1350.8(12) | 1914.8(12) | 17.4(5)         |
| C(15) | 8120(2)    | -1620.6(13) | 2221.1(14) | 23.8(6)         |
| C(16) | 5096(3)    | 839.6(14)   | 485.8(13)  | 23.5(5)         |
| C(17) | 5898(2)    | 924.4(12)   | 1206.7(12) | 17.8(5)         |
| C(18) | 7005(3)    | 1477.0(15)  | 1224.8(15) | 30.3(6)         |
| C(19) | 2375(3)    | 1523.7(13)  | 1082.2(14) | 23.2(5)         |
| C(20) | 3597(2)    | 1745.2(11)  | 1605.7(12) | 16.6(5)         |
| C(21) | 4192(3)    | 2439.8(12)  | 1383.9(13) | 23.2(5)         |
| C(22) | 1438(3)    | 1202.0(14)  | 2871.5(15) | 28.2(6)         |
| C(23) | 2807(2)    | 1116.5(12)  | 3315.6(13) | 19.4(5)         |
| C(24) | 2803(3)    | 1374.9(16)  | 4040.7(16) | 39.0(7)         |
| C(28) | 3098(2)    | -1526.3(12) | 906.9(12)  | 14.8(5)         |
| C(29) | 1716(2)    | -349.9(12)  | 440.4(14)  | 20.7(5)         |
| C(30) | 525(2)     | -368.5(13)  | 1487.6(13) | 21.0(5)         |
| C(31) | 405(3)     | -1510.1(13) | 662.9(14)  | 24.3(6)         |
| C(25) | 1307(2)    | -482.5(13)  | 3542.1(14) | 22.4(5)         |
| C(26) | 2773(3)    | -431.7(18)  | 3770.0(17) | 43.5(9)         |
| C(27) | 3333(4)    | -554(3)     | 4464(2)    | 81.6(16)        |

**Table 35. Bond lengths [ $\text{\AA}$ ] and angles [ $^\circ$ ] for  $[\text{PhBP}^{\text{iPr}}_3]\text{TiMnBr}(\text{CO})_4$  (9).**

|              |           |                |           |
|--------------|-----------|----------------|-----------|
| Mn-C(29)     | 1.799(3)  | C(12)-H(12C)   | 0.9800    |
| Mn-C(31)     | 1.823(3)  | C(13)-C(14)    | 1.531(3)  |
| Mn-C(30)     | 1.851(3)  | C(13)-H(13A)   | 0.9800    |
| Mn-C(28)     | 1.913(3)  | C(13)-H(13B)   | 0.9800    |
| Mn-Br        | 2.5299(4) | C(13)-H(13C)   | 0.9800    |
| Mn-Ti        | 2.6437(4) | C(14)-C(15)    | 1.530(3)  |
| P(1)-C(7)    | 1.819(2)  | C(14)-H(14)    | 1.0000    |
| P(1)-C(14)   | 1.853(2)  | C(15)-H(15A)   | 0.9800    |
| P(1)-C(11)   | 1.860(2)  | C(15)-H(15B)   | 0.9800    |
| P(1)-Ti      | 2.7020(6) | C(15)-H(15C)   | 0.9800    |
| P(2)-C(8)    | 1.825(2)  | C(16)-C(17)    | 1.527(3)  |
| P(2)-C(20)   | 1.847(2)  | C(16)-H(16A)   | 0.9800    |
| P(2)-C(17)   | 1.854(2)  | C(16)-H(16B)   | 0.9800    |
| P(2)-Ti      | 2.6993(6) | C(16)-H(16C)   | 0.9800    |
| P(3)-C(9)    | 1.825(2)  | C(17)-C(18)    | 1.530(3)  |
| P(3)-C(26)   | 1.854(3)  | C(17)-H(17)    | 1.0000    |
| P(3)-C(23)   | 1.859(2)  | C(18)-H(18A)   | 0.9800    |
| P(3)-Ti      | 2.7011(6) | C(18)-H(18B)   | 0.9800    |
| B-C(1)       | 1.640(3)  | C(18)-H(18C)   | 0.9800    |
| B-C(8)       | 1.669(3)  | C(19)-C(20)    | 1.533(3)  |
| B-C(7)       | 1.678(3)  | C(19)-H(19A)   | 0.9800    |
| B-C(9)       | 1.680(3)  | C(19)-H(19B)   | 0.9800    |
| O(1)-C(28)   | 1.073(3)  | C(19)-H(19C)   | 0.9800    |
| O(2)-C(29)   | 1.146(3)  | C(20)-C(21)    | 1.532(3)  |
| O(3)-C(30)   | 1.147(3)  | C(20)-H(20)    | 1.0000    |
| O(4)-C(31)   | 1.139(3)  | C(21)-H(21A)   | 0.9800    |
| C(1)-C(2)    | 1.396(3)  | C(21)-H(21B)   | 0.9800    |
| C(1)-C(6)    | 1.405(3)  | C(21)-H(21C)   | 0.9800    |
| C(2)-C(3)    | 1.387(3)  | C(22)-C(23)    | 1.525(4)  |
| C(2)-H(2)    | 0.9500    | C(22)-H(22A)   | 0.9800    |
| C(3)-C(4)    | 1.380(3)  | C(22)-H(22B)   | 0.9800    |
| C(3)-H(3)    | 0.9500    | C(22)-H(22C)   | 0.9800    |
| C(4)-C(5)    | 1.377(4)  | C(23)-C(24)    | 1.524(4)  |
| C(4)-H(4)    | 0.9500    | C(23)-H(23)    | 1.0000    |
| C(5)-C(6)    | 1.383(4)  | C(24)-H(24A)   | 0.9800    |
| C(5)-H(5)    | 0.9500    | C(24)-H(24B)   | 0.9800    |
| C(6)-H(6)    | 0.9500    | C(24)-H(24C)   | 0.9800    |
| C(7)-H(7A)   | 0.9900    | C(25)-C(26)    | 1.492(4)  |
| C(7)-H(7B)   | 0.9900    | C(25)-H(25A)   | 0.9800    |
| C(8)-H(8A)   | 0.9900    | C(25)-H(25B)   | 0.9800    |
| C(8)-H(8B)   | 0.9900    | C(25)-H(25C)   | 0.9800    |
| C(9)-H(9A)   | 0.9900    | C(26)-C(27)    | 1.416(5)  |
| C(9)-H(9B)   | 0.9900    | C(26)-H(26)    | 1.0000    |
| C(10)-C(11)  | 1.531(3)  | C(27)-H(27A)   | 0.9800    |
| C(10)-H(10A) | 0.9800    | C(27)-H(27B)   | 0.9800    |
| C(10)-H(10B) | 0.9800    | C(27)-H(27C)   | 0.9800    |
| C(10)-H(10C) | 0.9800    |                |           |
| C(11)-C(12)  | 1.542(3)  | C(29)-Mn-C(31) | 93.11(11) |
| C(11)-H(11)  | 1.0000    | C(29)-Mn-C(30) | 91.08(11) |
| C(12)-H(12A) | 0.9800    | C(31)-Mn-C(30) | 93.68(11) |
| C(12)-H(12B) | 0.9800    | C(29)-Mn-C(28) | 92.61(10) |



|                  |             |                     |            |
|------------------|-------------|---------------------|------------|
| C(31)-Mn-C(28)   | 93.22(11)   | C(4)-C(5)-H(5)      | 119.6      |
| C(30)-Mn-C(28)   | 171.99(10)  | C(6)-C(5)-H(5)      | 119.6      |
| C(29)-Mn-Br      | 177.98(8)   | C(5)-C(6)-C(1)      | 122.9(2)   |
| C(31)-Mn-Br      | 86.73(8)    | C(5)-C(6)-H(6)      | 118.6      |
| C(30)-Mn-Br      | 90.94(8)    | C(1)-C(6)-H(6)      | 118.6      |
| C(28)-Mn-Br      | 85.39(7)    | B-C(7)-P(1)         | 118.08(15) |
| C(29)-Mn-Tl      | 94.09(8)    | B-C(7)-H(7A)        | 107.8      |
| C(31)-Mn-Tl      | 172.74(8)   | P(1)-C(7)-H(7A)     | 107.8      |
| C(30)-Mn-Tl      | 85.23(8)    | B-C(7)-H(7B)        | 107.8      |
| C(28)-Mn-Tl      | 87.41(7)    | P(1)-C(7)-H(7B)     | 107.8      |
| Br-Mn-Tl         | 86.11(1)    | H(7A)-C(7)-H(7B)    | 107.1      |
| C(7)-P(1)-C(14)  | 109.52(11)  | B-C(8)-P(2)         | 118.93(15) |
| C(7)-P(1)-C(11)  | 107.66(11)  | B-C(8)-H(8A)        | 107.6      |
| C(14)-P(1)-C(11) | 105.54(11)  | P(2)-C(8)-H(8A)     | 107.6      |
| C(7)-P(1)-Tl     | 107.47(7)   | B-C(8)-H(8B)        | 107.6      |
| C(14)-P(1)-Tl    | 115.44(8)   | P(2)-C(8)-H(8B)     | 107.6      |
| C(11)-P(1)-Tl    | 110.98(8)   | H(8A)-C(8)-H(8B)    | 107.0      |
| C(8)-P(2)-C(20)  | 107.39(10)  | B-C(9)-P(3)         | 121.21(16) |
| C(8)-P(2)-C(17)  | 107.13(11)  | B-C(9)-H(9A)        | 107.0      |
| C(20)-P(2)-C(17) | 110.39(11)  | P(3)-C(9)-H(9A)     | 107.0      |
| C(8)-P(2)-Tl     | 110.48(7)   | B-C(9)-H(9B)        | 107.0      |
| C(20)-P(2)-Tl    | 111.07(8)   | P(3)-C(9)-H(9B)     | 107.0      |
| C(17)-P(2)-Tl    | 110.26(7)   | H(9A)-C(9)-H(9B)    | 106.8      |
| C(9)-P(3)-C(26)  | 110.12(12)  | C(11)-C(10)-H(10A)  | 109.5      |
| C(9)-P(3)-C(23)  | 103.03(11)  | C(11)-C(10)-H(10B)  | 109.5      |
| C(26)-P(3)-C(23) | 109.40(14)  | H(10A)-C(10)-H(10B) | 109.5      |
| C(9)-P(3)-Tl     | 107.34(8)   | C(11)-C(10)-H(10C)  | 109.5      |
| C(26)-P(3)-Tl    | 112.47(12)  | H(10A)-C(10)-H(10C) | 109.5      |
| C(23)-P(3)-Tl    | 114.01(8)   | H(10B)-C(10)-H(10C) | 109.5      |
| C(1)-B-C(8)      | 107.18(17)  | C(10)-C(11)-C(12)   | 112.00(19) |
| C(1)-B-C(7)      | 109.36(18)  | C(10)-C(11)-P(1)    | 111.08(18) |
| C(8)-B-C(7)      | 110.34(18)  | C(12)-C(11)-P(1)    | 116.21(16) |
| C(1)-B-C(9)      | 104.14(18)  | C(10)-C(11)-H(11)   | 105.5      |
| C(8)-B-C(9)      | 112.10(18)  | C(12)-C(11)-H(11)   | 105.5      |
| C(7)-B-C(9)      | 113.33(17)  | P(1)-C(11)-H(11)    | 105.5      |
| Mn-Tl-P(2)       | 132.191(15) | C(11)-C(12)-H(12A)  | 109.5      |
| Mn-Tl-P(3)       | 129.188(15) | C(11)-C(12)-H(12B)  | 109.5      |
| P(2)-Tl-P(3)     | 84.322(18)  | H(12A)-C(12)-H(12B) | 109.5      |
| Mn-Tl-P(1)       | 123.368(14) | C(11)-C(12)-H(12C)  | 109.5      |
| P(2)-Tl-P(1)     | 87.692(18)  | H(12A)-C(12)-H(12C) | 109.5      |
| P(3)-Tl-P(1)     | 84.777(18)  | H(12B)-C(12)-H(12C) | 109.5      |
| C(2)-C(1)-C(6)   | 114.2(2)    | C(14)-C(13)-H(13A)  | 109.5      |
| C(2)-C(1)-B      | 124.29(19)  | C(14)-C(13)-H(13B)  | 109.5      |
| C(6)-C(1)-B      | 121.3(2)    | H(13A)-C(13)-H(13B) | 109.5      |
| C(3)-C(2)-C(1)   | 123.7(2)    | C(14)-C(13)-H(13C)  | 109.5      |
| C(3)-C(2)-H(2)   | 118.2       | H(13A)-C(13)-H(13C) | 109.5      |
| C(1)-C(2)-H(2)   | 118.2       | H(13B)-C(13)-H(13C) | 109.5      |
| C(4)-C(3)-C(2)   | 119.9(2)    | C(15)-C(14)-C(13)   | 110.1(2)   |
| C(4)-C(3)-H(3)   | 120.1       | C(15)-C(14)-P(1)    | 113.79(17) |
| C(2)-C(3)-H(3)   | 120.1       | C(13)-C(14)-P(1)    | 111.49(15) |
| C(5)-C(4)-C(3)   | 118.6(2)    | C(15)-C(14)-H(14)   | 107.0      |
| C(5)-C(4)-H(4)   | 120.7       | C(13)-C(14)-H(14)   | 107.0      |
| C(3)-C(4)-H(4)   | 120.7       | P(1)-C(14)-H(14)    | 107.0      |
| C(4)-C(5)-C(6)   | 120.7(2)    | C(14)-C(15)-H(15A)  | 109.5      |

|                     |            |                     |            |
|---------------------|------------|---------------------|------------|
| C(14)-C(15)-H(15B)  | 109.5      | C(23)-C(22)-H(22A)  | 109.5      |
| H(15A)-C(15)-H(15B) | 109.5      | C(23)-C(22)-H(22B)  | 109.5      |
| C(14)-C(15)-H(15C)  | 109.5      | H(22A)-C(22)-H(22B) | 109.5      |
| H(15A)-C(15)-H(15C) | 109.5      | C(23)-C(22)-H(22C)  | 109.5      |
| H(15B)-C(15)-H(15C) | 109.5      | H(22A)-C(22)-H(22C) | 109.5      |
| C(17)-C(16)-H(16A)  | 109.5      | H(22B)-C(22)-H(22C) | 109.5      |
| C(17)-C(16)-H(16B)  | 109.5      | C(24)-C(23)-C(22)   | 110.7(2)   |
| H(16A)-C(16)-H(16B) | 109.5      | C(24)-C(23)-P(3)    | 114.16(18) |
| C(17)-C(16)-H(16C)  | 109.5      | C(22)-C(23)-P(3)    | 114.46(17) |
| H(16A)-C(16)-H(16C) | 109.5      | C(24)-C(23)-H(23)   | 105.5      |
| H(16B)-C(16)-H(16C) | 109.5      | C(22)-C(23)-H(23)   | 105.5      |
| C(16)-C(17)-C(18)   | 111.2(2)   | P(3)-C(23)-H(23)    | 105.5      |
| C(16)-C(17)-P(2)    | 111.55(17) | C(23)-C(24)-H(24A)  | 109.5      |
| C(18)-C(17)-P(2)    | 117.62(17) | C(23)-C(24)-H(24B)  | 109.5      |
| C(16)-C(17)-H(17)   | 105.1      | H(24A)-C(24)-H(24B) | 109.5      |
| C(18)-C(17)-H(17)   | 105.1      | C(23)-C(24)-H(24C)  | 109.5      |
| P(2)-C(17)-H(17)    | 105.1      | H(24A)-C(24)-H(24C) | 109.5      |
| C(17)-C(18)-H(18A)  | 109.5      | H(24B)-C(24)-H(24C) | 109.5      |
| C(17)-C(18)-H(18B)  | 109.5      | O(1)-C(28)-Mn       | 179.4(2)   |
| H(18A)-C(18)-H(18B) | 109.5      | O(2)-C(29)-Mn       | 177.9(2)   |
| C(17)-C(18)-H(18C)  | 109.5      | O(3)-C(30)-Mn       | 178.6(2)   |
| H(18A)-C(18)-H(18C) | 109.5      | O(4)-C(31)-Mn       | 178.9(2)   |
| H(18B)-C(18)-H(18C) | 109.5      | C(26)-C(25)-H(25A)  | 109.5      |
| C(20)-C(19)-H(19A)  | 109.5      | C(26)-C(25)-H(25B)  | 109.5      |
| C(20)-C(19)-H(19B)  | 109.5      | H(25A)-C(25)-H(25B) | 109.5      |
| H(19A)-C(19)-H(19B) | 109.5      | C(26)-C(25)-H(25C)  | 109.5      |
| C(20)-C(19)-H(19C)  | 109.5      | H(25A)-C(25)-H(25C) | 109.5      |
| H(19A)-C(19)-H(19C) | 109.5      | H(25B)-C(25)-H(25C) | 109.5      |
| H(19B)-C(19)-H(19C) | 109.5      | C(27)-C(26)-C(25)   | 119.5(3)   |
| C(21)-C(20)-C(19)   | 110.6(2)   | C(27)-C(26)-P(3)    | 119.7(2)   |
| C(21)-C(20)-P(2)    | 114.62(17) | C(25)-C(26)-P(3)    | 113.26(19) |
| C(19)-C(20)-P(2)    | 113.79(16) | C(27)-C(26)-H(26)   | 99.2       |
| C(21)-C(20)-H(20)   | 105.7      | C(25)-C(26)-H(26)   | 99.2       |
| C(19)-C(20)-H(20)   | 105.7      | P(3)-C(26)-H(26)    | 99.2       |
| P(2)-C(20)-H(20)    | 105.7      | C(26)-C(27)-H(27A)  | 109.5      |
| C(20)-C(21)-H(21A)  | 109.5      | C(26)-C(27)-H(27B)  | 109.5      |
| C(20)-C(21)-H(21B)  | 109.5      | H(27A)-C(27)-H(27B) | 109.5      |
| H(21A)-C(21)-H(21B) | 109.5      | C(26)-C(27)-H(27C)  | 109.5      |
| C(20)-C(21)-H(21C)  | 109.5      | H(27A)-C(27)-H(27C) | 109.5      |
| H(21A)-C(21)-H(21C) | 109.5      | H(27B)-C(27)-H(27C) | 109.5      |
| H(21B)-C(21)-H(21C) | 109.5      |                     |            |

---

Symmetry transformations used to generate equivalent atoms:

**Table 36. Anisotropic displacement parameters ( $\text{\AA}^2 \times 10^4$ ) for  $[\text{PhBP}^{\text{iPr}}_3]\text{TiMnBr}(\text{CO})_4$  (9). The anisotropic displacement factor exponent takes the form:  $-2\pi^2 [h^2 a^{*2} U^{11} + \dots + 2 h k a^* b^* U^{12}]$**

|       | $U^{11}$ | $U^{22}$ | $U^{33}$ | $U^{23}$ | $U^{13}$ | $U^{12}$ |
|-------|----------|----------|----------|----------|----------|----------|
| Mn    | 132(2)   | 145(2)   | 154(2)   | 14(1)    | -17(1)   | -25(1)   |
| P(1)  | 126(3)   | 106(3)   | 152(3)   | -15(2)   | -5(2)    | 8(2)     |
| P(2)  | 150(3)   | 111(3)   | 124(3)   | 9(2)     | -12(2)   | -22(2)   |
| P(3)  | 142(3)   | 132(3)   | 180(3)   | 31(2)    | 27(2)    | 4(2)     |
| B     | 151(12)  | 109(11)  | 135(13)  | -9(9)    | 8(10)    | -7(9)    |
| Br    | 204(1)   | 228(1)   | 228(1)   | 67(1)    | 44(1)    | 0(1)     |
| Tl    | 118(1)   | 113(1)   | 160(1)   | -4(1)    | -12(1)   | -11(1)   |
| O(1)  | 307(11)  | 244(9)   | 321(11)  | -33(8)   | 80(9)    | -46(8)   |
| O(2)  | 302(11)  | 316(10)  | 244(11)  | 68(8)    | 2(9)     | -40(8)   |
| O(3)  | 183(9)   | 308(10)  | 399(12)  | -49(9)   | 47(9)    | 8(8)     |
| O(4)  | 337(12)  | 348(11)  | 373(13)  | -6(9)    | -138(10) | -150(9)  |
| C(1)  | 168(11)  | 137(10)  | 115(11)  | 0(8)     | 37(9)    | -19(8)   |
| C(2)  | 194(12)  | 159(11)  | 231(14)  | -51(9)   | 3(10)    | 19(9)    |
| C(3)  | 165(12)  | 264(13)  | 212(14)  | -60(10)  | -29(10)  | 31(10)   |
| C(4)  | 232(13)  | 232(12)  | 145(13)  | -40(9)   | -18(10)  | -70(10)  |
| C(5)  | 431(17)  | 128(11)  | 260(15)  | -38(10)  | -100(13) | -4(11)   |
| C(6)  | 332(15)  | 142(11)  | 206(14)  | -12(9)   | -107(11) | 55(10)   |
| C(7)  | 135(11)  | 124(10)  | 148(12)  | -8(8)    | -11(9)   | -12(8)   |
| C(8)  | 157(11)  | 128(10)  | 111(11)  | 1(8)     | 2(9)     | -16(8)   |
| C(9)  | 162(11)  | 126(11)  | 152(12)  | 2(8)     | 18(9)    | 13(8)    |
| C(10) | 242(13)  | 150(11)  | 340(16)  | 27(10)   | -1(12)   | -24(10)  |
| C(11) | 187(12)  | 128(10)  | 213(13)  | 30(9)    | 21(10)   | -3(9)    |
| C(12) | 266(14)  | 190(12)  | 214(14)  | 53(10)   | -21(11)  | 10(10)   |
| C(13) | 218(13)  | 211(12)  | 207(14)  | -51(10)  | 40(11)   | 17(10)   |
| C(14) | 168(12)  | 153(11)  | 193(13)  | -51(9)   | 8(10)    | 11(9)    |
| C(15) | 179(12)  | 241(12)  | 282(15)  | -64(10)  | 11(11)   | 63(10)   |
| C(16) | 273(14)  | 271(13)  | 154(13)  | -45(10)  | 21(11)   | -14(11)  |
| C(17) | 194(12)  | 161(11)  | 172(13)  | -26(9)   | 16(10)   | -25(9)   |
| C(18) | 290(15)  | 365(15)  | 280(16)  | -90(12)  | 120(12)  | -143(12) |
| C(19) | 231(13)  | 199(12)  | 232(14)  | 7(10)    | -47(11)  | 44(10)   |
| C(20) | 203(12)  | 142(10)  | 142(12)  | 15(8)    | 2(10)    | 6(9)     |
| C(21) | 359(15)  | 141(11)  | 191(13)  | 33(9)    | 36(11)   | 4(10)    |
| C(22) | 209(13)  | 212(12)  | 416(18)  | 90(11)   | 36(12)   | 59(10)   |
| C(23) | 220(13)  | 174(11)  | 195(13)  | 20(9)    | 54(10)   | 44(9)    |
| C(24) | 457(19)  | 417(17)  | 305(17)  | -77(13)  | 96(14)   | 201(14)  |
| C(28) | 142(11)  | 177(11)  | 106(11)  | 34(8)    | -28(9)   | -107(9)  |
| C(29) | 173(12)  | 197(12)  | 235(14)  | -22(10)  | -5(10)   | -31(9)   |
| C(30) | 165(12)  | 218(12)  | 224(14)  | 20(9)    | -22(10)  | -52(9)   |
| C(31) | 231(13)  | 238(13)  | 239(14)  | 46(10)   | -14(11)  | -6(10)   |
| C(25) | 211(13)  | 239(12)  | 245(14)  | 11(10)   | 99(11)   | -25(10)  |
| C(26) | 260(15)  | 518(19)  | 480(20)  | 357(16)  | -61(14)  | -133(13) |
| C(27) | 350(20)  | 1590(40) | 460(20)  | 660(30)  | -41(18)  | -280(20) |

**Table 37. Crystal Data and Structure Analysis Details for [PhBP<sup>i</sup>Pr<sub>3</sub>]Mn(CN<sup>t</sup>Bu)<sub>3</sub> (10).**

|                         |                                                                  |
|-------------------------|------------------------------------------------------------------|
| Empirical formula       | C <sub>42</sub> H <sub>80</sub> BMnN <sub>3</sub> P <sub>3</sub> |
| Formula weight          | 785.75                                                           |
| Crystallization solvent | petroleum ether                                                  |
| Crystal shape           | rough block                                                      |
| Crystal color           | pale yellow                                                      |
| Crystal size            | 0.18 x 0.28 x 0.33 mm                                            |

### Data Collection

|                                                                 |                                                        |                                      |
|-----------------------------------------------------------------|--------------------------------------------------------|--------------------------------------|
| Preliminary photograph(s)                                       | rotation                                               |                                      |
| Type of diffractometer                                          | Bruker SMART 1000                                      |                                      |
| Wavelength                                                      | 0.71073 Å MoKα                                         |                                      |
| Data collection temperature                                     | 100 K                                                  |                                      |
| Theta range for 36474 reflections used in lattice determination | 2.32 to 35.87°                                         |                                      |
| Unit cell dimensions                                            | a = 11.2996(7) Å<br>b = 17.578(1) Å<br>c = 23.108(1) Å | α = 90°<br>β = 93.660(2)°<br>γ = 90° |
| Volume                                                          | 4580.4(5) Å <sup>3</sup>                               |                                      |
| Z                                                               | 4                                                      |                                      |
| Crystal system                                                  | monoclinic                                             |                                      |
| Space group                                                     | P 21/n (# 14)                                          |                                      |
| Density (calculated)                                            | 1.139 g/cm <sup>3</sup>                                |                                      |
| F(000)                                                          | 1712                                                   |                                      |
| Theta range for data collection                                 | 2.0 to 36.1°                                           |                                      |
| Completeness to theta = 36.13°                                  | 89.9%                                                  |                                      |
| Index ranges                                                    | -16 ≤ h ≤ 18, -28 ≤ k ≤ 28, -37 ≤ l ≤ 38               |                                      |
| Data collection scan type                                       | ω scans                                                |                                      |
| Reflections collected                                           | 80212                                                  |                                      |
| Independent reflections                                         | 19689 [R <sub>int</sub> = 0.0796]                      |                                      |
| Reflections > 2σ(I)                                             | 13052                                                  |                                      |
| Average σ(I)/(net I)                                            | 0.0760                                                 |                                      |
| Absorption coefficient                                          | 0.42 mm <sup>-1</sup>                                  |                                      |
| Absorption correction                                           | none                                                   |                                      |
| Reflections monitored for decay                                 | initial data recollected at end                        |                                      |
| Decay of standards                                              | 0%                                                     |                                      |

**Table 37 (cont.)****Structure Solution and Refinement**

|                                                         |                                                                              |
|---------------------------------------------------------|------------------------------------------------------------------------------|
| Primary solution method                                 | direct methods                                                               |
| Secondary solution method                               | difference map                                                               |
| Hydrogen placement                                      | calculated                                                                   |
| Refinement method                                       | Full-matrix least-squares on $F^2$                                           |
| Data / restraints / parameters                          | 19689 / 0 / 472                                                              |
| Treatment of hydrogen atoms                             | not refined, $U_{\text{iso}}$ fixed at 120% $U_{\text{eq}}$ of attached atom |
| Goodness-of-fit on $F^2$                                | 1.28                                                                         |
| Final R indices [ $I > 2\sigma(I)$ , 13052 reflections] | $R1 = 0.0437$ , $wR2 = 0.0707$                                               |
| R indices (all data)                                    | $R1 = 0.0784$ , $wR2 = 0.0752$                                               |
| Type of weighting scheme used                           | sigma                                                                        |
| Weighting scheme used                                   | calc $w=1/[\sigma^2(F_o^2)]$ where $P=(F_o^2+2F_c^2)/3$                      |
| Max shift/error                                         | 0.001                                                                        |
| Average shift/error                                     | 0.000                                                                        |
| Largest diff. peak and hole                             | 1.15 and $-0.67 \text{ e} \cdot \text{\AA}^{-3}$                             |

**Programs Used**

|                      |                     |
|----------------------|---------------------|
| Cell refinement      | Bruker SMART 5.606  |
| Data collection      | Bruker SMART 5.054  |
| Data reduction       | Bruker SAINT 6.45   |
| Structure solution   | Bruker SHELXTL 6.14 |
| Structure refinement | Bruker SHELXTL 6.14 |

**Special Refinement Details**

Three bad reflections were omitted (011, 002, -103).

Refinement of  $F^2$  against ALL reflections. The weighted R-factor ( $wR$ ) and goodness of fit ( $S$ ) are based on  $F^2$ , conventional R-factors ( $R$ ) are based on  $F$ , with  $F$  set to zero for negative  $F^2$ . The threshold expression of  $F^2 > 2\sigma(F^2)$  is used only for calculating R-factors(gt) etc. and is not relevant to the choice of reflections for refinement. R-factors based on  $F^2$  are statistically about twice as large as those based on  $F$ , and R-factors based on ALL data will be even larger.

All esds (except the esd in the dihedral angle between two l.s. planes) are estimated using the full covariance matrix. The cell esds are taken into account individually in the estimation of esds in distances, angles and torsion angles; correlations between esds in cell parameters are only used when they are defined by crystal symmetry. An approximate (isotropic) treatment of cell esds is used for estimating esds involving l.s. planes.

**Table 38. Atomic coordinates ( $\times 10^4$ ) and equivalent isotropic displacement parameters ( $\text{\AA}^2 \times 10^3$ ) for  $[\text{PhBP}^{i\text{Pr}}_3]\text{Mn}(\text{CN}^t\text{Bu})_3$  (10).  $U(\text{eq})$  is defined as one third of the trace of the orthogonalized  $U_{ij}$  tensor.**

|       | x           | y          | z          | $U_{\text{eq}}$ |
|-------|-------------|------------|------------|-----------------|
| Mn    | 7128.9(2)   | 2488.7(1)  | 847.9(1)   | 9.6(1)          |
| P(1)  | 5523.2(3)   | 2949.8(2)  | 244.8(1)   | 10.2(1)         |
| P(2)  | 8078.4(3)   | 3688.9(2)  | 753.3(1)   | 10.2(1)         |
| P(3)  | 8082.7(3)   | 2116.3(2)  | 11.0(1)    | 11.1(1)         |
| B     | 7301.5(12)  | 3574.4(7)  | -499.5(5)  | 11.6(2)         |
| N(1)  | 6174.5(11)  | 2770.3(6)  | 2028.2(4)  | 22.5(2)         |
| N(2)  | 9130.9(10)  | 1842.8(6)  | 1639.7(5)  | 21.3(2)         |
| N(3)  | 5844.2(10)  | 994.7(6)   | 959.6(5)   | 19.7(2)         |
| C(1)  | 7396.3(11)  | 4068.9(6)  | -1098.1(5) | 12.7(2)         |
| C(2)  | 6573.7(11)  | 4635.8(6)  | -1275.2(5) | 14.4(2)         |
| C(3)  | 6679.1(12)  | 5076.2(7)  | -1770.6(5) | 17.0(2)         |
| C(4)  | 7629.7(12)  | 4975.0(7)  | -2112.5(5) | 18.2(3)         |
| C(5)  | 8463.7(12)  | 4425.0(7)  | -1954.7(5) | 18.9(3)         |
| C(6)  | 8343.6(11)  | 3984.8(7)  | -1459.8(5) | 16.7(2)         |
| C(7)  | 5955.8(10)  | 3672.9(6)  | -267.0(5)  | 11.7(2)         |
| C(8)  | 8297.5(10)  | 3932.6(6)  | -9.8(5)    | 11.8(2)         |
| C(9)  | 7570.9(11)  | 2659.0(6)  | -630.4(5)  | 12.1(2)         |
| C(10) | 3735.3(11)  | 1805.7(7)  | 54.2(5)    | 18.5(3)         |
| C(11) | 4746.5(11)  | 2208.8(7)  | -236.1(5)  | 13.4(2)         |
| C(12) | 4283.5(11)  | 2461.1(8)  | -846.8(5)  | 19.5(3)         |
| C(13) | 3704.6(11)  | 3005.6(7)  | 1082.1(5)  | 17.2(2)         |
| C(14) | 4320.2(11)  | 3453.8(7)  | 615.2(5)   | 13.4(2)         |
| C(15) | 3395.1(11)  | 3852.4(7)  | 205.2(5)   | 17.3(2)         |
| C(16) | 6735.2(11)  | 4572.7(7)  | 1557.0(5)  | 17.8(3)         |
| C(17) | 7355.2(11)  | 4598.4(6)  | 985.3(5)   | 13.6(2)         |
| C(18) | 8144.1(12)  | 5313.8(7)  | 983.5(5)   | 18.1(3)         |
| C(19) | 9516.9(11)  | 3811.8(7)  | 1801.6(5)  | 16.9(2)         |
| C(20) | 9583.5(10)  | 3686.9(7)  | 1145.6(5)  | 13.6(2)         |
| C(21) | 10540.0(11) | 4187.6(7)  | 896.6(5)   | 18.6(3)         |
| C(22) | 10423.2(12) | 1558.9(8)  | 329.3(6)   | 22.1(3)         |
| C(23) | 9750.0(11)  | 2229.6(7)  | 40.4(5)    | 14.1(2)         |
| C(24) | 10301.5(11) | 2420.8(7)  | -531.3(5)  | 18.4(3)         |
| C(25) | 8150.0(12)  | 484.8(7)   | 233.9(6)   | 23.0(3)         |
| C(26) | 7800.9(12)  | 1103.6(7)  | -217.7(5)  | 16.7(2)         |
| C(27) | 8252.9(13)  | 883.1(7)   | -809.4(6)  | 24.8(3)         |
| C(28) | 6505.0(11)  | 2719.1(6)  | 1557.3(5)  | 13.9(2)         |
| C(29) | 5897.3(13)  | 2801.5(7)  | 2634.3(5)  | 20.5(3)         |
| C(30) | 6282.8(15)  | 2059.3(9)  | 2922.8(6)  | 34.0(4)         |
| C(31) | 4564.0(15)  | 2899.1(11) | 2664.1(7)  | 43.3(5)         |
| C(32) | 6578(2)     | 3462.3(10) | 2919.5(7)  | 55.0(6)         |
| C(33) | 8390.9(11)  | 2095.8(7)  | 1313.8(5)  | 14.1(2)         |
| C(34) | 9992.8(12)  | 1455.6(8)  | 2032.5(6)  | 22.4(3)         |
| C(35) | 9664.1(16)  | 1595.5(10) | 2650.9(6)  | 43.1(4)         |
| C(36) | 11221.3(13) | 1778.1(9)  | 1945.2(7)  | 36.9(4)         |
| C(37) | 9944.9(15)  | 609.3(8)   | 1888.2(7)  | 35.3(4)         |
| C(38) | 6355.2(11)  | 1576.6(7)  | 905.7(5)   | 13.2(2)         |

|       |            |           |           |         |
|-------|------------|-----------|-----------|---------|
| C(39) | 5300.3(12) | 404.4(7)  | 1292.0(5) | 19.1(3) |
| C(40) | 6183.6(16) | 152.3(10) | 1776.6(7) | 44.9(4) |
| C(41) | 4969.6(16) | -250.5(8) | 883.7(7)  | 38.4(4) |
| C(42) | 4181.6(14) | 726.8(8)  | 1535.6(6) | 30.7(3) |

---

**Table 39. Bond lengths [Å] and angles [°] for [PhBP<sup>i</sup>Pr<sub>3</sub>]Mn(CN<sup>t</sup>Bu)<sub>3</sub> (10).**

|              |            |              |            |
|--------------|------------|--------------|------------|
| Mn-C(38)     | 1.8352(12) | C(13)-C(14)  | 1.5377(16) |
| Mn-C(33)     | 1.8637(12) | C(13)-H(13A) | 0.9800     |
| Mn-C(28)     | 1.8698(12) | C(13)-H(13B) | 0.9800     |
| Mn-P(1)      | 2.3597(4)  | C(13)-H(13C) | 0.9800     |
| Mn-P(3)      | 2.3655(3)  | C(14)-C(15)  | 1.5345(17) |
| Mn-P(2)      | 2.3831(4)  | C(14)-H(14)  | 1.0000     |
| P(1)-C(7)    | 1.8240(11) | C(15)-H(15A) | 0.9800     |
| P(1)-C(14)   | 1.8744(12) | C(15)-H(15B) | 0.9800     |
| P(1)-C(11)   | 1.8914(12) | C(15)-H(15C) | 0.9800     |
| P(2)-C(8)    | 1.8466(11) | C(16)-C(17)  | 1.5349(16) |
| P(2)-C(20)   | 1.8755(12) | C(16)-H(16A) | 0.9800     |
| P(2)-C(17)   | 1.8888(12) | C(16)-H(16B) | 0.9800     |
| P(3)-C(9)    | 1.8253(11) | C(16)-H(16C) | 0.9800     |
| P(3)-C(26)   | 1.8782(12) | C(17)-C(18)  | 1.5416(16) |
| P(3)-C(23)   | 1.8914(12) | C(17)-H(17)  | 1.0000     |
| B-C(1)       | 1.6430(17) | C(18)-H(18A) | 0.9800     |
| B-C(7)       | 1.6539(17) | C(18)-H(18B) | 0.9800     |
| B-C(8)       | 1.6676(17) | C(18)-H(18C) | 0.9800     |
| B-C(9)       | 1.6688(17) | C(19)-C(20)  | 1.5383(16) |
| N(1)-C(28)   | 1.1762(15) | C(19)-H(19A) | 0.9800     |
| N(1)-C(29)   | 1.4555(15) | C(19)-H(19B) | 0.9800     |
| N(2)-C(33)   | 1.1763(15) | C(19)-H(19C) | 0.9800     |
| N(2)-C(34)   | 1.4569(16) | C(20)-C(21)  | 1.5340(16) |
| N(3)-C(38)   | 1.1849(15) | C(20)-H(20)  | 1.0000     |
| N(3)-C(39)   | 1.4508(15) | C(21)-H(21A) | 0.9800     |
| C(1)-C(2)    | 1.4056(17) | C(21)-H(21B) | 0.9800     |
| C(1)-C(6)    | 1.4071(16) | C(21)-H(21C) | 0.9800     |
| C(2)-C(3)    | 1.3934(16) | C(22)-C(23)  | 1.5328(17) |
| C(2)-H(2)    | 0.9500     | C(22)-H(22A) | 0.9800     |
| C(3)-C(4)    | 1.3850(18) | C(22)-H(22B) | 0.9800     |
| C(3)-H(3)    | 0.9500     | C(22)-H(22C) | 0.9800     |
| C(4)-C(5)    | 1.3828(18) | C(23)-C(24)  | 1.5334(16) |
| C(4)-H(4)    | 0.9500     | C(23)-H(23)  | 1.0000     |
| C(5)-C(6)    | 1.3945(16) | C(24)-H(24A) | 0.9800     |
| C(5)-H(5)    | 0.9500     | C(24)-H(24B) | 0.9800     |
| C(6)-H(6)    | 0.9500     | C(24)-H(24C) | 0.9800     |
| C(7)-H(7A)   | 0.9900     | C(25)-C(26)  | 1.5412(18) |
| C(7)-H(7B)   | 0.9900     | C(25)-H(25A) | 0.9800     |
| C(8)-H(8A)   | 0.9900     | C(25)-H(25B) | 0.9800     |
| C(8)-H(8B)   | 0.9900     | C(25)-H(25C) | 0.9800     |
| C(9)-H(9A)   | 0.9900     | C(26)-C(27)  | 1.5395(17) |
| C(9)-H(9B)   | 0.9900     | C(26)-H(26)  | 1.0000     |
| C(10)-C(11)  | 1.5349(16) | C(27)-H(27A) | 0.9800     |
| C(10)-H(10A) | 0.9800     | C(27)-H(27B) | 0.9800     |
| C(10)-H(10B) | 0.9800     | C(27)-H(27C) | 0.9800     |
| C(10)-H(10C) | 0.9800     | C(29)-C(30)  | 1.5164(19) |
| C(11)-C(12)  | 1.5386(16) | C(29)-C(32)  | 1.520(2)   |
| C(11)-H(11)  | 1.0000     | C(29)-C(31)  | 1.522(2)   |
| C(12)-H(12A) | 0.9800     | C(30)-H(30A) | 0.9800     |
| C(12)-H(12B) | 0.9800     | C(30)-H(30B) | 0.9800     |
| C(12)-H(12C) | 0.9800     | C(30)-H(30C) | 0.9800     |



|                  |            |                  |            |
|------------------|------------|------------------|------------|
| C(31)-H(31A)     | 0.9800     | C(20)-P(2)-C(17) | 105.05(5)  |
| C(31)-H(31B)     | 0.9800     | C(8)-P(2)-Mn     | 112.43(4)  |
| C(31)-H(31C)     | 0.9800     | C(20)-P(2)-Mn    | 110.71(4)  |
| C(32)-H(32A)     | 0.9800     | C(17)-P(2)-Mn    | 121.19(4)  |
| C(32)-H(32B)     | 0.9800     | C(9)-P(3)-C(26)  | 103.16(5)  |
| C(32)-H(32C)     | 0.9800     | C(9)-P(3)-C(23)  | 103.73(5)  |
| C(34)-C(35)      | 1.519(2)   | C(26)-P(3)-C(23) | 105.10(6)  |
| C(34)-C(36)      | 1.525(2)   | C(9)-P(3)-Mn     | 112.45(4)  |
| C(34)-C(37)      | 1.5248(19) | C(26)-P(3)-Mn    | 114.48(4)  |
| C(35)-H(35A)     | 0.9800     | C(23)-P(3)-Mn    | 116.51(4)  |
| C(35)-H(35B)     | 0.9800     | C(1)-B-C(7)      | 109.20(9)  |
| C(35)-H(35C)     | 0.9800     | C(1)-B-C(8)      | 107.10(9)  |
| C(36)-H(36A)     | 0.9800     | C(7)-B-C(8)      | 109.55(9)  |
| C(36)-H(36B)     | 0.9800     | C(1)-B-C(9)      | 109.58(9)  |
| C(36)-H(36C)     | 0.9800     | C(7)-B-C(9)      | 110.00(9)  |
| C(37)-H(37A)     | 0.9800     | C(8)-B-C(9)      | 111.35(9)  |
| C(37)-H(37B)     | 0.9800     | C(28)-N(1)-C(29) | 173.50(14) |
| C(37)-H(37C)     | 0.9800     | C(33)-N(2)-C(34) | 174.29(13) |
| C(39)-C(40)      | 1.518(2)   | C(38)-N(3)-C(39) | 153.99(12) |
| C(39)-C(41)      | 1.5199(18) | C(2)-C(1)-C(6)   | 114.56(10) |
| C(39)-C(42)      | 1.5255(19) | C(2)-C(1)-B      | 122.86(10) |
| C(40)-H(40A)     | 0.9800     | C(6)-C(1)-B      | 122.51(11) |
| C(40)-H(40B)     | 0.9800     | C(3)-C(2)-C(1)   | 122.91(11) |
| C(40)-H(40C)     | 0.9800     | C(3)-C(2)-H(2)   | 118.5      |
| C(41)-H(41A)     | 0.9800     | C(1)-C(2)-H(2)   | 118.5      |
| C(41)-H(41B)     | 0.9800     | C(4)-C(3)-C(2)   | 120.49(12) |
| C(41)-H(41C)     | 0.9800     | C(4)-C(3)-H(3)   | 119.8      |
| C(42)-H(42A)     | 0.9800     | C(2)-C(3)-H(3)   | 119.8      |
| C(42)-H(42B)     | 0.9800     | C(5)-C(4)-C(3)   | 118.66(11) |
| C(42)-H(42C)     | 0.9800     | C(5)-C(4)-H(4)   | 120.7      |
|                  |            | C(3)-C(4)-H(4)   | 120.7      |
| C(38)-Mn-C(33)   | 89.12(5)   | C(4)-C(5)-C(6)   | 120.26(12) |
| C(38)-Mn-C(28)   | 85.26(5)   | C(4)-C(5)-H(5)   | 119.9      |
| C(33)-Mn-C(28)   | 83.75(5)   | C(6)-C(5)-H(5)   | 119.9      |
| C(38)-Mn-P(1)    | 89.49(4)   | C(5)-C(6)-C(1)   | 123.12(12) |
| C(33)-Mn-P(1)    | 178.27(4)  | C(5)-C(6)-H(6)   | 118.4      |
| C(28)-Mn-P(1)    | 97.16(4)   | C(1)-C(6)-H(6)   | 118.4      |
| C(38)-Mn-P(3)    | 93.54(4)   | B-C(7)-P(1)      | 115.32(8)  |
| C(33)-Mn-P(3)    | 89.88(4)   | B-C(7)-H(7A)     | 108.4      |
| C(28)-Mn-P(3)    | 173.54(4)  | P(1)-C(7)-H(7A)  | 108.4      |
| P(1)-Mn-P(3)     | 89.173(12) | B-C(7)-H(7B)     | 108.4      |
| C(38)-Mn-P(2)    | 178.09(4)  | P(1)-C(7)-H(7B)  | 108.4      |
| C(33)-Mn-P(2)    | 92.79(4)   | H(7A)-C(7)-H(7B) | 107.5      |
| C(28)-Mn-P(2)    | 94.93(4)   | B-C(8)-P(2)      | 115.75(8)  |
| P(1)-Mn-P(2)     | 88.594(12) | B-C(8)-H(8A)     | 108.3      |
| P(3)-Mn-P(2)     | 86.485(12) | P(2)-C(8)-H(8A)  | 108.3      |
| C(7)-P(1)-C(14)  | 101.47(5)  | B-C(8)-H(8B)     | 108.3      |
| C(7)-P(1)-C(11)  | 103.44(5)  | P(2)-C(8)-H(8B)  | 108.3      |
| C(14)-P(1)-C(11) | 105.73(5)  | H(8A)-C(8)-H(8B) | 107.4      |
| C(7)-P(1)-Mn     | 113.23(4)  | B-C(9)-P(3)      | 114.13(7)  |
| C(14)-P(1)-Mn    | 116.44(4)  | B-C(9)-H(9A)     | 108.7      |
| C(11)-P(1)-Mn    | 114.89(4)  | P(3)-C(9)-H(9A)  | 108.7      |
| C(8)-P(2)-C(20)  | 106.81(5)  | B-C(9)-H(9B)     | 108.7      |
| C(8)-P(2)-C(17)  | 99.29(5)   | P(3)-C(9)-H(9B)  | 108.7      |

|                     |            |                     |            |
|---------------------|------------|---------------------|------------|
| H(9A)-C(9)-H(9B)    | 107.6      | H(18B)-C(18)-H(18C) | 109.5      |
| C(11)-C(10)-H(10A)  | 109.5      | C(20)-C(19)-H(19A)  | 109.5      |
| C(11)-C(10)-H(10B)  | 109.5      | C(20)-C(19)-H(19B)  | 109.5      |
| H(10A)-C(10)-H(10B) | 109.5      | H(19A)-C(19)-H(19B) | 109.5      |
| C(11)-C(10)-H(10C)  | 109.5      | C(20)-C(19)-H(19C)  | 109.5      |
| H(10A)-C(10)-H(10C) | 109.5      | H(19A)-C(19)-H(19C) | 109.5      |
| H(10B)-C(10)-H(10C) | 109.5      | H(19B)-C(19)-H(19C) | 109.5      |
| C(10)-C(11)-C(12)   | 108.35(10) | C(21)-C(20)-C(19)   | 111.57(10) |
| C(10)-C(11)-P(1)    | 113.05(8)  | C(21)-C(20)-P(2)    | 117.17(8)  |
| C(12)-C(11)-P(1)    | 117.28(8)  | C(19)-C(20)-P(2)    | 112.09(8)  |
| C(10)-C(11)-H(11)   | 105.8      | C(21)-C(20)-H(20)   | 104.9      |
| C(12)-C(11)-H(11)   | 105.8      | C(19)-C(20)-H(20)   | 104.9      |
| P(1)-C(11)-H(11)    | 105.8      | P(2)-C(20)-H(20)    | 104.9      |
| C(11)-C(12)-H(12A)  | 109.5      | C(20)-C(21)-H(21A)  | 109.5      |
| C(11)-C(12)-H(12B)  | 109.5      | C(20)-C(21)-H(21B)  | 109.5      |
| H(12A)-C(12)-H(12B) | 109.5      | H(21A)-C(21)-H(21B) | 109.5      |
| C(11)-C(12)-H(12C)  | 109.5      | C(20)-C(21)-H(21C)  | 109.5      |
| H(12A)-C(12)-H(12C) | 109.5      | H(21A)-C(21)-H(21C) | 109.5      |
| H(12B)-C(12)-H(12C) | 109.5      | H(21B)-C(21)-H(21C) | 109.5      |
| C(14)-C(13)-H(13A)  | 109.5      | C(23)-C(22)-H(22A)  | 109.5      |
| C(14)-C(13)-H(13B)  | 109.5      | C(23)-C(22)-H(22B)  | 109.5      |
| H(13A)-C(13)-H(13B) | 109.5      | H(22A)-C(22)-H(22B) | 109.5      |
| C(14)-C(13)-H(13C)  | 109.5      | C(23)-C(22)-H(22C)  | 109.5      |
| H(13A)-C(13)-H(13C) | 109.5      | H(22A)-C(22)-H(22C) | 109.5      |
| H(13B)-C(13)-H(13C) | 109.5      | H(22B)-C(22)-H(22C) | 109.5      |
| C(15)-C(14)-C(13)   | 110.25(10) | C(22)-C(23)-C(24)   | 109.03(10) |
| C(15)-C(14)-P(1)    | 114.78(8)  | C(22)-C(23)-P(3)    | 113.58(8)  |
| C(13)-C(14)-P(1)    | 116.87(8)  | C(24)-C(23)-P(3)    | 116.80(8)  |
| C(15)-C(14)-H(14)   | 104.5      | C(22)-C(23)-H(23)   | 105.5      |
| C(13)-C(14)-H(14)   | 104.5      | C(24)-C(23)-H(23)   | 105.5      |
| P(1)-C(14)-H(14)    | 104.5      | P(3)-C(23)-H(23)    | 105.5      |
| C(14)-C(15)-H(15A)  | 109.5      | C(23)-C(24)-H(24A)  | 109.5      |
| C(14)-C(15)-H(15B)  | 109.5      | C(23)-C(24)-H(24B)  | 109.5      |
| H(15A)-C(15)-H(15B) | 109.5      | H(24A)-C(24)-H(24B) | 109.5      |
| C(14)-C(15)-H(15C)  | 109.5      | C(23)-C(24)-H(24C)  | 109.5      |
| H(15A)-C(15)-H(15C) | 109.5      | H(24A)-C(24)-H(24C) | 109.5      |
| H(15B)-C(15)-H(15C) | 109.5      | H(24B)-C(24)-H(24C) | 109.5      |
| C(17)-C(16)-H(16A)  | 109.5      | C(26)-C(25)-H(25A)  | 109.5      |
| C(17)-C(16)-H(16B)  | 109.5      | C(26)-C(25)-H(25B)  | 109.5      |
| H(16A)-C(16)-H(16B) | 109.5      | H(25A)-C(25)-H(25B) | 109.5      |
| C(17)-C(16)-H(16C)  | 109.5      | C(26)-C(25)-H(25C)  | 109.5      |
| H(16A)-C(16)-H(16C) | 109.5      | H(25A)-C(25)-H(25C) | 109.5      |
| H(16B)-C(16)-H(16C) | 109.5      | H(25B)-C(25)-H(25C) | 109.5      |
| C(16)-C(17)-C(18)   | 108.79(9)  | C(27)-C(26)-C(25)   | 109.79(10) |
| C(16)-C(17)-P(2)    | 116.67(8)  | C(27)-C(26)-P(3)    | 115.38(9)  |
| C(18)-C(17)-P(2)    | 115.41(8)  | C(25)-C(26)-P(3)    | 116.55(9)  |
| C(16)-C(17)-H(17)   | 104.9      | C(27)-C(26)-H(26)   | 104.5      |
| C(18)-C(17)-H(17)   | 104.9      | C(25)-C(26)-H(26)   | 104.5      |
| P(2)-C(17)-H(17)    | 104.9      | P(3)-C(26)-H(26)    | 104.5      |
| C(17)-C(18)-H(18A)  | 109.5      | C(26)-C(27)-H(27A)  | 109.5      |
| C(17)-C(18)-H(18B)  | 109.5      | C(26)-C(27)-H(27B)  | 109.5      |
| H(18A)-C(18)-H(18B) | 109.5      | H(27A)-C(27)-H(27B) | 109.5      |
| C(17)-C(18)-H(18C)  | 109.5      | C(26)-C(27)-H(27C)  | 109.5      |
| H(18A)-C(18)-H(18C) | 109.5      | H(27A)-C(27)-H(27C) | 109.5      |

|                     |            |                     |            |
|---------------------|------------|---------------------|------------|
| H(27B)-C(27)-H(27C) | 109.5      | H(35B)-C(35)-H(35C) | 109.5      |
| N(1)-C(28)-Mn       | 170.91(11) | C(34)-C(36)-H(36A)  | 109.5      |
| N(1)-C(29)-C(30)    | 108.50(11) | C(34)-C(36)-H(36B)  | 109.5      |
| N(1)-C(29)-C(32)    | 108.18(11) | H(36A)-C(36)-H(36B) | 109.5      |
| C(30)-C(29)-C(32)   | 110.10(14) | C(34)-C(36)-H(36C)  | 109.5      |
| N(1)-C(29)-C(31)    | 108.80(11) | H(36A)-C(36)-H(36C) | 109.5      |
| C(30)-C(29)-C(31)   | 109.53(12) | H(36B)-C(36)-H(36C) | 109.5      |
| C(32)-C(29)-C(31)   | 111.67(14) | C(34)-C(37)-H(37A)  | 109.5      |
| C(29)-C(30)-H(30A)  | 109.5      | C(34)-C(37)-H(37B)  | 109.5      |
| C(29)-C(30)-H(30B)  | 109.5      | H(37A)-C(37)-H(37B) | 109.5      |
| H(30A)-C(30)-H(30B) | 109.5      | C(34)-C(37)-H(37C)  | 109.5      |
| C(29)-C(30)-H(30C)  | 109.5      | H(37A)-C(37)-H(37C) | 109.5      |
| H(30A)-C(30)-H(30C) | 109.5      | H(37B)-C(37)-H(37C) | 109.5      |
| H(30B)-C(30)-H(30C) | 109.5      | N(3)-C(38)-Mn       | 177.92(10) |
| C(29)-C(31)-H(31A)  | 109.5      | N(3)-C(39)-C(40)    | 108.58(11) |
| C(29)-C(31)-H(31B)  | 109.5      | N(3)-C(39)-C(41)    | 107.99(11) |
| H(31A)-C(31)-H(31B) | 109.5      | C(40)-C(39)-C(41)   | 111.16(13) |
| C(29)-C(31)-H(31C)  | 109.5      | N(3)-C(39)-C(42)    | 108.59(11) |
| H(31A)-C(31)-H(31C) | 109.5      | C(40)-C(39)-C(42)   | 110.94(12) |
| H(31B)-C(31)-H(31C) | 109.5      | C(41)-C(39)-C(42)   | 109.50(12) |
| C(29)-C(32)-H(32A)  | 109.5      | C(39)-C(40)-H(40A)  | 109.5      |
| C(29)-C(32)-H(32B)  | 109.5      | C(39)-C(40)-H(40B)  | 109.5      |
| H(32A)-C(32)-H(32B) | 109.5      | H(40A)-C(40)-H(40B) | 109.5      |
| C(29)-C(32)-H(32C)  | 109.5      | C(39)-C(40)-H(40C)  | 109.5      |
| H(32A)-C(32)-H(32C) | 109.5      | H(40A)-C(40)-H(40C) | 109.5      |
| H(32B)-C(32)-H(32C) | 109.5      | H(40B)-C(40)-H(40C) | 109.5      |
| N(2)-C(33)-Mn       | 175.09(11) | C(39)-C(41)-H(41A)  | 109.5      |
| N(2)-C(34)-C(35)    | 108.46(11) | C(39)-C(41)-H(41B)  | 109.5      |
| N(2)-C(34)-C(36)    | 108.79(11) | H(41A)-C(41)-H(41B) | 109.5      |
| C(35)-C(34)-C(36)   | 110.10(13) | C(39)-C(41)-H(41C)  | 109.5      |
| N(2)-C(34)-C(37)    | 107.85(11) | H(41A)-C(41)-H(41C) | 109.5      |
| C(35)-C(34)-C(37)   | 110.86(13) | H(41B)-C(41)-H(41C) | 109.5      |
| C(36)-C(34)-C(37)   | 110.71(12) | C(39)-C(42)-H(42A)  | 109.5      |
| C(34)-C(35)-H(35A)  | 109.5      | C(39)-C(42)-H(42B)  | 109.5      |
| C(34)-C(35)-H(35B)  | 109.5      | H(42A)-C(42)-H(42B) | 109.5      |
| H(35A)-C(35)-H(35B) | 109.5      | C(39)-C(42)-H(42C)  | 109.5      |
| C(34)-C(35)-H(35C)  | 109.5      | H(42A)-C(42)-H(42C) | 109.5      |
| H(35A)-C(35)-H(35C) | 109.5      | H(42B)-C(42)-H(42C) | 109.5      |

---

Symmetry transformations used to generate equivalent atoms:

**Table 40. Anisotropic displacement parameters ( $\text{\AA}^2 \times 10^4$ ) for  $[\text{PhBP}^{\text{iPr}}_3]\text{Mn}(\text{CN}^t\text{Bu})_3$  (10). The anisotropic displacement factor exponent takes the form:  $-2\pi^2 [h^2 a^{*2} U^{11} + \dots + 2 h k a^* b^* U^{12}]$**

|       | $U^{11}$ | $U^{22}$ | $U^{33}$ | $U^{23}$ | $U^{13}$ | $U^{12}$ |
|-------|----------|----------|----------|----------|----------|----------|
| Mn    | 93(1)    | 99(1)    | 96(1)    | 6(1)     | 4(1)     | -2(1)    |
| P(1)  | 86(1)    | 119(1)   | 102(1)   | 0(1)     | 7(1)     | -4(1)    |
| P(2)  | 101(2)   | 110(1)   | 94(1)    | -2(1)    | 2(1)     | -8(1)    |
| P(3)  | 104(2)   | 106(1)   | 124(1)   | -6(1)    | 18(1)    | 2(1)     |
| B     | 115(6)   | 128(6)   | 105(6)   | 5(4)     | 4(5)     | -10(5)   |
| N(1)  | 283(7)   | 245(6)   | 153(5)   | -15(4)   | 62(5)    | -55(5)   |
| N(2)  | 191(6)   | 231(6)   | 212(5)   | 54(4)    | -38(5)   | 28(5)    |
| N(3)  | 185(6)   | 152(5)   | 257(6)   | 25(4)    | 29(5)    | -28(4)   |
| C(1)  | 138(6)   | 139(5)   | 100(5)   | -19(4)   | -14(4)   | -35(4)   |
| C(2)  | 154(6)   | 144(6)   | 134(5)   | -4(4)    | 8(5)     | -27(5)   |
| C(3)  | 209(7)   | 146(6)   | 149(6)   | 21(4)    | -29(5)   | -13(5)   |
| C(4)  | 257(7)   | 182(6)   | 106(5)   | 27(4)    | -4(5)    | -72(5)   |
| C(5)  | 218(7)   | 221(6)   | 131(5)   | -1(5)    | 46(5)    | -29(5)   |
| C(6)  | 180(7)   | 181(6)   | 139(5)   | 9(4)     | 21(5)    | -3(5)    |
| C(7)  | 116(6)   | 120(5)   | 114(5)   | 10(4)    | -5(4)    | -7(4)    |
| C(8)  | 119(6)   | 131(5)   | 105(5)   | 10(4)    | 8(4)     | -7(4)    |
| C(9)  | 108(6)   | 147(6)   | 109(5)   | -8(4)    | 6(4)     | -6(4)    |
| C(10) | 135(6)   | 194(6)   | 226(6)   | -16(5)   | 21(5)    | -46(5)   |
| C(11) | 97(6)    | 161(6)   | 142(5)   | -22(4)   | -3(4)    | -7(4)    |
| C(12) | 188(7)   | 243(6)   | 149(5)   | -24(5)   | -30(5)   | -20(6)   |
| C(13) | 139(6)   | 217(6)   | 164(6)   | 6(5)     | 43(5)    | 8(5)     |
| C(14) | 117(6)   | 150(5)   | 135(5)   | -14(4)   | 10(4)    | 9(4)     |
| C(15) | 126(6)   | 196(6)   | 198(6)   | 16(5)    | 9(5)     | 36(5)    |
| C(16) | 179(7)   | 192(6)   | 166(6)   | -26(4)   | 29(5)    | 23(5)    |
| C(17) | 155(6)   | 121(5)   | 131(5)   | -7(4)    | -3(5)    | 4(4)     |
| C(18) | 241(7)   | 132(6)   | 168(6)   | -20(4)   | -9(5)    | -17(5)   |
| C(19) | 166(6)   | 216(6)   | 122(5)   | -3(4)    | -19(5)   | -7(5)    |
| C(20) | 116(6)   | 166(6)   | 124(5)   | -9(4)    | -7(4)    | -19(5)   |
| C(21) | 125(6)   | 251(7)   | 181(6)   | -11(5)   | -1(5)    | -64(5)   |
| C(22) | 130(6)   | 287(7)   | 246(7)   | 67(5)    | 28(5)    | 45(5)    |
| C(23) | 116(6)   | 169(6)   | 140(5)   | -2(4)    | 19(5)    | 6(5)     |
| C(24) | 112(6)   | 257(7)   | 186(6)   | 5(5)     | 35(5)    | 10(5)    |
| C(25) | 219(7)   | 143(6)   | 336(8)   | 16(5)    | 69(6)    | 31(5)    |
| C(26) | 162(6)   | 121(5)   | 223(6)   | -40(4)   | 50(5)    | -5(5)    |
| C(27) | 288(8)   | 189(7)   | 276(7)   | -96(5)   | 86(6)    | -22(6)   |
| C(28) | 123(6)   | 124(5)   | 169(6)   | 8(4)     | -3(5)    | -22(4)   |
| C(29) | 298(8)   | 229(6)   | 96(5)    | -9(4)    | 65(5)    | -18(6)   |
| C(30) | 435(10)  | 352(9)   | 244(7)   | 77(6)    | 103(7)   | 100(7)   |
| C(31) | 383(10)  | 696(12)  | 234(8)   | 112(8)   | 127(7)   | 216(9)   |
| C(32) | 1004(17) | 476(11)  | 187(8)   | -128(7)  | 177(9)   | -394(11) |
| C(33) | 145(6)   | 120(5)   | 159(5)   | -4(4)    | 23(5)    | -21(5)   |
| C(34) | 191(7)   | 239(7)   | 231(7)   | 55(5)    | -75(5)   | 78(5)    |
| C(35) | 487(11)  | 581(11)  | 219(8)   | 66(7)    | -34(7)   | 271(9)   |
| C(36) | 214(8)   | 431(9)   | 445(10)  | 85(7)    | -111(7)  | 16(7)    |
| C(37) | 400(10)  | 245(7)   | 393(9)   | 73(6)    | -146(7)  | 60(7)    |
| C(38) | 120(6)   | 161(6)   | 116(5)   | -4(4)    | 9(4)     | 26(5)    |

|       |         |         |         |         |        |         |
|-------|---------|---------|---------|---------|--------|---------|
| C(39) | 257(7)  | 153(6)  | 165(6)  | 20(4)   | 29(5)  | -74(5)  |
| C(40) | 445(11) | 483(11) | 406(10) | 207(8)  | -61(8) | 11(9)   |
| C(41) | 568(11) | 208(7)  | 395(9)  | -107(6) | 175(8) | -176(7) |
| C(42) | 363(9)  | 315(8)  | 260(7)  | 22(6)   | 142(7) | -29(7)  |

---

**Table 41. Crystal Data and Structure Analysis Details for  $\{(Hdbabh)MnI(\mu-N-dbabh)\}_2$ .**

|                         |                              |
|-------------------------|------------------------------|
| Empirical formula       | $C_{104}H_{92}I_2Mn_2N_6O_2$ |
| Formula weight          | 1821.52                      |
| Crystallization solvent | benzene/THF/petroleum ether  |
| Crystal shape           | thin blade                   |
| Crystal color           | colorless                    |
| Crystal size            | 0.03 x 0.13 x 0.43 mm        |

### Data Collection

|                                                                |                                                       |                                                                                       |
|----------------------------------------------------------------|-------------------------------------------------------|---------------------------------------------------------------------------------------|
| Preliminary photograph(s)                                      | rotation                                              |                                                                                       |
| Type of diffractometer                                         | Bruker SMART 1000                                     |                                                                                       |
| Wavelength                                                     | 0.71073 Å MoK $\alpha$                                |                                                                                       |
| Data collection temperature                                    | 100 K                                                 |                                                                                       |
| Theta range for 1766 reflections used in lattice determination | 2.20 to 26.94°                                        |                                                                                       |
| Unit cell dimensions                                           | a = 10.602(3) Å<br>b = 12.269(3) Å<br>c = 17.484(4) Å | $\alpha = 81.448(5)^\circ$<br>$\beta = 81.588(5)^\circ$<br>$\gamma = 76.562(5)^\circ$ |
| Volume                                                         | 2172.6(9) Å <sup>3</sup>                              |                                                                                       |
| Z                                                              | 1                                                     |                                                                                       |
| Crystal system                                                 | triclinic                                             |                                                                                       |
| Space group                                                    | P-1                                                   |                                                                                       |
| Density (calculated)                                           | 1.392 g/cm <sup>3</sup>                               |                                                                                       |
| F(000)                                                         | 930                                                   |                                                                                       |
| Theta range for data collection                                | 2.2 to 28.3°                                          |                                                                                       |
| Completeness to theta = 28.33°                                 | 66.1%                                                 |                                                                                       |
| Index ranges                                                   | -13 ≤ h ≤ 14, -15 ≤ k ≤ 16, 0 ≤ l ≤ 23                |                                                                                       |
| Data collection scan type                                      | $\omega$ scans                                        |                                                                                       |
| Reflections collected                                          | 7486                                                  |                                                                                       |
| Independent reflections                                        | 7486 [ $R_{int} = 0.0000$ ]                           |                                                                                       |
| Reflections > 2 $\sigma$ (I)                                   | 4104                                                  |                                                                                       |
| Average $\sigma$ (I)/(net I)                                   | 0.2405                                                |                                                                                       |
| Absorption coefficient                                         | 1.06 mm <sup>-1</sup>                                 |                                                                                       |
| Absorption correction                                          | Semi-empirical from equivalents                       |                                                                                       |
| Max. and min. transmission                                     | 0.969 and 0.851                                       |                                                                                       |
| Reflections monitored for decay                                | initial data recollected at end                       |                                                                                       |

Decay of standards 0%

## Structure Solution and Refinement

|                                                        |                                                                              |
|--------------------------------------------------------|------------------------------------------------------------------------------|
| Primary solution method                                | direct methods                                                               |
| Secondary solution method                              | difference map                                                               |
| Hydrogen placement                                     | calculated                                                                   |
| Refinement method                                      | Full-matrix least-squares on $F^2$                                           |
| Data / restraints / parameters                         | 7486 / 0 / 244                                                               |
| Treatment of hydrogen atoms                            | not refined, $U_{\text{iso}}$ fixed at 120% $U_{\text{eq}}$ of attached atom |
| Goodness-of-fit on $F^2$                               | 1.28                                                                         |
| Final R indices [ $I > 2\sigma(I)$ , 4104 reflections] | $R1 = 0.0892$ , $wR2 = 0.1213$                                               |
| R indices (all data)                                   | $R1 = 0.1561$ , $wR2 = 0.1304$                                               |
| Type of weighting scheme used                          | sigma                                                                        |
| Weighting scheme used                                  | calc $w=1/[\sigma^2(F_o^2)]$ where $P=(F_o^2+2F_c^2)/3$                      |
| Max shift/error                                        | 0.000                                                                        |
| Average shift/error                                    | 0.000                                                                        |
| Largest diff. peak and hole                            | 2.83 and $-1.50 \text{ e} \cdot \text{\AA}^{-3}$                             |

## Programs Used

|                      |                     |
|----------------------|---------------------|
| Cell refinement      | Bruker SMART 5.606  |
| Data collection      | Bruker SMART 5.054  |
| Data reduction       | Bruker SAINT 6.45   |
| Structure solution   | Bruker SHELXTL 6.14 |
| Structure refinement | Bruker SHELXTL 6.14 |

## Special Refinement Details

Refinement of  $F^2$  against ALL reflections. The weighted R-factor ( $wR$ ) and goodness of fit ( $S$ ) are based on  $F^2$ , conventional R-factors ( $R$ ) are based on  $F$ , with  $F$  set to zero for negative  $F^2$ . The threshold expression of  $F^2 > 2\sigma(F^2)$  is used only for calculating R-factors(gt) etc. and is not relevant to the choice of reflections for refinement. R-factors based on  $F^2$  are statistically about twice as large as those based on  $F$ , and R-factors based on ALL data will be even larger.

All esds (except the esd in the dihedral angle between two l.s. planes) are estimated using the full covariance matrix. The cell esds are taken into account individually in the estimation of esds in distances, angles and torsion angles; correlations between esds in cell parameters are only used when they are defined by crystal symmetry. An approximate (isotropic) treatment of cell esds is used for estimating esds involving l.s. planes.

**Table 42. Atomic coordinates (  $\times 10^4$ ) and equivalent isotropic displacement parameters ( $\text{\AA}^2 \times 10^3$ ) for  $\{(\text{Hdbabh})\text{MnI}(\mu\text{-N-dbabh})\}_2$ .  $U(\text{eq})$  is defined as one third of the trace of the orthogonalized  $U^{ij}$  tensor.**

|       | x        | y        | z       | $U_{\text{eq}}$ |
|-------|----------|----------|---------|-----------------|
| Mn    | 9659(2)  | 847(1)   | 5553(1) | 13(1)           |
| N(1)  | 8427(9)  | 1627(8)  | 6450(5) | 15(2)           |
| N(2)  | 9351(8)  | 936(7)   | 4363(5) | 8(2)            |
| N(3)  | 723(9)   | 1919(8)  | 7634(5) | 20(3)           |
| I     | 11646(1) | 2051(1)  | 5463(1) | 16(1)           |
| O     | 8950(8)  | 4286(6)  | 6586(4) | 23(2)           |
| C(1)  | 7018(11) | 2197(10) | 6347(7) | 20(3)           |
| C(2)  | 6540(11) | 2519(10) | 7163(6) | 12(3)           |
| C(3)  | 5563(11) | 3412(10) | 7446(7) | 22(3)           |
| C(4)  | 5353(12) | 3431(11) | 8254(7) | 29(4)           |
| C(5)  | 6020(12) | 2651(10) | 8758(8) | 28(4)           |
| C(6)  | 6989(11) | 1724(10) | 8458(7) | 23(3)           |
| C(7)  | 7212(11) | 1706(9)  | 7665(6) | 10(3)           |
| C(8)  | 8058(12) | 867(10)  | 7125(7) | 22(3)           |
| C(9)  | 7144(11) | 285(10)  | 6810(6) | 16(3)           |
| C(10) | 6806(11) | -726(10) | 6964(7) | 24(3)           |
| C(11) | 5845(12) | -901(11) | 6563(7) | 27(4)           |
| C(12) | 5196(13) | -95(11)  | 6051(7) | 32(4)           |
| C(13) | 5496(12) | 1000(11) | 5929(7) | 28(4)           |
| C(14) | 6496(12) | 1145(10) | 6312(7) | 21(3)           |
| C(15) | 9832(11) | 1830(9)  | 3815(6) | 7(3)            |
| C(16) | 8648(12) | 2893(10) | 4006(6) | 23(3)           |
| C(17) | 8665(11) | 4013(10) | 3971(6) | 17(3)           |
| C(18) | 7398(12) | 4701(11) | 4148(7) | 28(4)           |
| C(19) | 6360(12) | 4294(10) | 4268(6) | 20(3)           |
| C(20) | 6351(12) | 3168(10) | 4297(6) | 21(3)           |
| C(21) | 7610(11) | 2448(10) | 4181(6) | 14(3)           |
| C(22) | 8015(11) | 1168(10) | 4096(6) | 18(3)           |
| C(23) | 8365(10) | 1163(9)  | 3208(6) | 6(3)            |
| C(24) | 7727(12) | 944(10)  | 2656(7) | 22(3)           |
| C(25) | 8290(12) | 1158(10) | 1883(7) | 31(4)           |
| C(26) | 9315(12) | 1590(10) | 1700(7) | 29(4)           |
| C(27) | 9973(12) | 1859(10) | 2282(7) | 25(3)           |
| C(28) | 9466(10) | 1643(9)  | 3040(6) | 9(3)            |
| C(29) | 1982(11) | 2317(9)  | 7580(7) | 17(3)           |
| C(30) | 2634(12) | 1494(10) | 8228(6) | 14(3)           |
| C(31) | 3961(12) | 1000(10) | 8288(7) | 22(3)           |
| C(32) | 4230(12) | 289(10)  | 8962(7) | 24(3)           |
| C(33) | 3277(11) | 83(10)   | 9569(6) | 19(3)           |
| C(34) | 1954(12) | 607(10)  | 9509(7) | 21(3)           |
| C(35) | 1678(11) | 1271(10) | 8838(7) | 15(3)           |
| C(36) | 382(12)  | 1947(10) | 8517(6) | 22(3)           |
| C(37) | 467(12)  | 3228(10) | 8522(7) | 21(3)           |
| C(38) | -173(13) | 4015(11) | 9013(7) | 36(4)           |
| C(39) | 175(12)  | 5044(11) | 8903(7) | 33(4)           |
| C(40) | 1175(13) | 5227(11) | 8342(7) | 38(4)           |



|       |          |          |          |        |
|-------|----------|----------|----------|--------|
| C(41) | 1859(12) | 4446(10) | 7843(7)  | 32(4)  |
| C(42) | 1446(11) | 3436(10) | 7954(6)  | 16(3)  |
| C(43) | 8383(13) | 4947(10) | 7229(7)  | 30(4)  |
| C(44) | 7535(13) | 5976(11) | 6801(7)  | 41(4)  |
| C(45) | 7225(13) | 5560(11) | 6112(7)  | 44(4)  |
| C(46) | 8427(12) | 4725(10) | 5853(7)  | 25(4)  |
| C(47) | 5860(17) | 7307(15) | 8833(10) | 79(6)  |
| C(48) | 5390(20) | 6440(20) | 8790(13) | 138(9) |
| C(49) | 6040(20) | 5617(18) | 9364(12) | 120(8) |
| C(50) | 6877(19) | 5747(17) | 9973(12) | 116(8) |
| C(51) | 7161(15) | 6791(13) | 9943(9)  | 55(5)  |
| C(52) | 6686(16) | 7446(15) | 9341(9)  | 70(5)  |

---

**Table 43. Bond lengths [ $\text{\AA}$ ] and angles [ $^\circ$ ] for  $\{(\text{Hdbabh})\text{MnI}(\mu\text{-N-dbabh})\}_2$ .**

|             |            |              |           |
|-------------|------------|--------------|-----------|
| Mn-N(1)     | 2.085(8)   | C(19)-C(20)  | 1.377(14) |
| Mn-N(2)     | 2.137(8)   | C(19)-H(19)  | 0.9500    |
| Mn-N(2)#1   | 2.189(8)   | C(20)-C(21)  | 1.425(14) |
| Mn-I        | 2.8149(18) | C(20)-H(20)  | 0.9500    |
| Mn-Mn#1     | 2.945(3)   | C(21)-C(22)  | 1.552(14) |
| N(1)-C(8)   | 1.457(13)  | C(22)-C(23)  | 1.543(13) |
| N(1)-C(1)   | 1.520(13)  | C(22)-H(22)  | 1.0000    |
| N(1)-H      | 0.9300     | C(23)-C(24)  | 1.346(14) |
| N(2)-C(15)  | 1.478(12)  | C(23)-C(28)  | 1.401(12) |
| N(2)-C(22)  | 1.507(13)  | C(24)-C(25)  | 1.409(14) |
| N(2)-Mn#1   | 2.189(8)   | C(24)-H(24)  | 0.9500    |
| N(3)-C(29)  | 1.511(12)  | C(25)-C(26)  | 1.295(14) |
| N(3)-C(36)  | 1.538(12)  | C(25)-H(25)  | 0.9500    |
| N(3)-H(3A)  | 0.9469     | C(26)-C(27)  | 1.432(15) |
| O-C(46)     | 1.451(13)  | C(26)-H(26)  | 0.9500    |
| O-C(43)     | 1.459(12)  | C(27)-C(28)  | 1.367(13) |
| C(1)-C(2)   | 1.521(13)  | C(27)-H(27)  | 0.9500    |
| C(1)-C(14)  | 1.530(14)  | C(29)-C(30)  | 1.532(15) |
| C(1)-H(1)   | 1.0000     | C(29)-C(42)  | 1.560(14) |
| C(2)-C(7)   | 1.366(15)  | C(29)-H(29)  | 1.0000    |
| C(2)-C(3)   | 1.414(14)  | C(30)-C(35)  | 1.402(13) |
| C(3)-C(4)   | 1.400(14)  | C(30)-C(31)  | 1.409(15) |
| C(3)-H(3)   | 0.9500     | C(31)-C(32)  | 1.380(15) |
| C(4)-C(5)   | 1.346(16)  | C(31)-H(31)  | 0.9500    |
| C(4)-H(4)   | 0.9500     | C(32)-C(33)  | 1.392(13) |
| C(5)-C(6)   | 1.449(15)  | C(32)-H(32)  | 0.9500    |
| C(5)-H(5)   | 0.9500     | C(33)-C(34)  | 1.412(14) |
| C(6)-C(7)   | 1.374(14)  | C(33)-H(33)  | 0.9500    |
| C(6)-H(6)   | 0.9500     | C(34)-C(35)  | 1.352(15) |
| C(7)-C(8)   | 1.539(14)  | C(34)-H(34)  | 0.9500    |
| C(8)-C(9)   | 1.531(14)  | C(35)-C(36)  | 1.565(15) |
| C(8)-H(8)   | 1.0000     | C(36)-C(37)  | 1.595(14) |
| C(9)-C(10)  | 1.349(14)  | C(36)-H(36)  | 1.0000    |
| C(9)-C(14)  | 1.382(16)  | C(37)-C(42)  | 1.369(14) |
| C(10)-C(11) | 1.389(15)  | C(37)-C(38)  | 1.379(14) |
| C(10)-H(10) | 0.9500     | C(38)-C(39)  | 1.376(14) |
| C(11)-C(12) | 1.360(16)  | C(38)-H(38)  | 0.9500    |
| C(11)-H(11) | 0.9500     | C(39)-C(40)  | 1.370(14) |
| C(12)-C(13) | 1.430(14)  | C(39)-H(39)  | 0.9500    |
| C(12)-H(12) | 0.9500     | C(40)-C(41)  | 1.396(15) |
| C(13)-C(14) | 1.390(15)  | C(40)-H(40)  | 0.9500    |
| C(13)-H(13) | 0.9500     | C(41)-C(42)  | 1.386(14) |
| C(15)-C(28) | 1.524(13)  | C(41)-H(41)  | 0.9500    |
| C(15)-C(16) | 1.623(15)  | C(43)-C(44)  | 1.533(16) |
| C(15)-H(15) | 1.0000     | C(43)-H(43A) | 0.9900    |
| C(16)-C(21) | 1.317(13)  | C(43)-H(43B) | 0.9900    |
| C(16)-C(17) | 1.371(14)  | C(44)-C(45)  | 1.481(14) |
| C(17)-C(18) | 1.428(15)  | C(44)-H(44A) | 0.9900    |
| C(17)-H(17) | 0.9500     | C(44)-H(44B) | 0.9900    |
| C(18)-C(19) | 1.288(14)  | C(45)-C(46)  | 1.497(15) |
| C(18)-H(18) | 0.9500     | C(45)-H(45A) | 0.9900    |

|                  |           |                   |           |
|------------------|-----------|-------------------|-----------|
| C(45)-H(45B)     | 0.9900    | C(5)-C(4)-C(3)    | 123.4(13) |
| C(46)-H(46A)     | 0.9900    | C(5)-C(4)-H(4)    | 118.3     |
| C(46)-H(46B)     | 0.9900    | C(3)-C(4)-H(4)    | 118.3     |
| C(47)-C(48)      | 1.29(2)   | C(4)-C(5)-C(6)    | 118.8(12) |
| C(47)-C(52)      | 1.388(19) | C(4)-C(5)-H(5)    | 120.6     |
| C(47)-H(47)      | 0.9500    | C(6)-C(5)-H(5)    | 120.6     |
| C(48)-C(49)      | 1.44(3)   | C(7)-C(6)-C(5)    | 118.1(12) |
| C(48)-H(48)      | 0.9500    | C(7)-C(6)-H(6)    | 120.9     |
| C(49)-C(50)      | 1.53(2)   | C(5)-C(6)-H(6)    | 120.9     |
| C(49)-H(49)      | 0.9500    | C(2)-C(7)-C(6)    | 122.0(11) |
| C(50)-C(51)      | 1.37(2)   | C(2)-C(7)-C(8)    | 103.3(10) |
| C(50)-H(50)      | 0.9500    | C(6)-C(7)-C(8)    | 134.6(12) |
| C(51)-C(52)      | 1.31(2)   | N(1)-C(8)-C(9)    | 102.5(9)  |
| C(51)-H(51)      | 0.9500    | N(1)-C(8)-C(7)    | 101.5(9)  |
| C(52)-H(52)      | 0.9500    | C(9)-C(8)-C(7)    | 107.7(9)  |
|                  |           | N(1)-C(8)-H(8)    | 114.6     |
| N(1)-Mn-N(2)     | 128.7(4)  | C(9)-C(8)-H(8)    | 114.6     |
| N(1)-Mn-N(2)#1   | 124.9(4)  | C(7)-C(8)-H(8)    | 114.6     |
| N(2)-Mn-N(2)#1   | 94.2(3)   | C(10)-C(9)-C(14)  | 121.2(12) |
| N(1)-Mn-I        | 97.2(2)   | C(10)-C(9)-C(8)   | 136.1(12) |
| N(2)-Mn-I        | 103.0(2)  | C(14)-C(9)-C(8)   | 102.4(10) |
| N(2)#1-Mn-I      | 105.5(2)  | C(9)-C(10)-C(11)  | 117.7(13) |
| N(1)-Mn-Mn#1     | 151.5(3)  | C(9)-C(10)-H(10)  | 121.1     |
| N(2)-Mn-Mn#1     | 47.8(2)   | C(11)-C(10)-H(10) | 121.1     |
| N(2)#1-Mn-Mn#1   | 46.3(2)   | C(12)-C(11)-C(10) | 123.6(13) |
| I-Mn-Mn#1        | 111.23(8) | C(12)-C(11)-H(11) | 118.2     |
| C(8)-N(1)-C(1)   | 93.2(8)   | C(10)-C(11)-H(11) | 118.2     |
| C(8)-N(1)-Mn     | 115.4(7)  | C(11)-C(12)-C(13) | 118.5(13) |
| C(1)-N(1)-Mn     | 120.8(7)  | C(11)-C(12)-H(12) | 120.7     |
| C(8)-N(1)-H      | 108.8     | C(13)-C(12)-H(12) | 120.7     |
| C(1)-N(1)-H      | 108.8     | C(14)-C(13)-C(12) | 117.0(13) |
| Mn-N(1)-H        | 108.8     | C(14)-C(13)-H(13) | 121.5     |
| C(15)-N(2)-C(22) | 96.2(8)   | C(12)-C(13)-H(13) | 121.5     |
| C(15)-N(2)-Mn    | 116.6(6)  | C(9)-C(14)-C(13)  | 121.8(11) |
| C(22)-N(2)-Mn    | 123.2(6)  | C(9)-C(14)-C(1)   | 107.2(11) |
| C(15)-N(2)-Mn#1  | 123.8(6)  | C(13)-C(14)-C(1)  | 130.8(13) |
| C(22)-N(2)-Mn#1  | 113.8(6)  | N(2)-C(15)-C(28)  | 102.5(8)  |
| Mn-N(2)-Mn#1     | 85.8(3)   | N(2)-C(15)-C(16)  | 99.0(7)   |
| C(29)-N(3)-C(36) | 95.5(8)   | C(28)-C(15)-C(16) | 98.4(9)   |
| C(29)-N(3)-H(3A) | 110.8     | N(2)-C(15)-H(15)  | 117.8     |
| C(36)-N(3)-H(3A) | 111.5     | C(28)-C(15)-H(15) | 117.8     |
| C(46)-O-C(43)    | 115.0(9)  | C(16)-C(15)-H(15) | 117.8     |
| N(1)-C(1)-C(2)   | 99.9(9)   | C(21)-C(16)-C(17) | 126.1(12) |
| N(1)-C(1)-C(14)  | 98.6(10)  | C(21)-C(16)-C(15) | 104.0(10) |
| C(2)-C(1)-C(14)  | 105.0(9)  | C(17)-C(16)-C(15) | 129.8(10) |
| N(1)-C(1)-H(1)   | 116.8     | C(16)-C(17)-C(18) | 112.8(11) |
| C(2)-C(1)-H(1)   | 116.8     | C(16)-C(17)-H(17) | 123.6     |
| C(14)-C(1)-H(1)  | 116.8     | C(18)-C(17)-H(17) | 123.6     |
| C(7)-C(2)-C(3)   | 120.7(11) | C(19)-C(18)-C(17) | 122.0(12) |
| C(7)-C(2)-C(1)   | 106.9(11) | C(19)-C(18)-H(18) | 119.0     |
| C(3)-C(2)-C(1)   | 132.3(12) | C(17)-C(18)-H(18) | 119.0     |
| C(4)-C(3)-C(2)   | 116.9(12) | C(18)-C(19)-C(20) | 124.7(13) |
| C(4)-C(3)-H(3)   | 121.6     | C(18)-C(19)-H(19) | 117.7     |
| C(2)-C(3)-H(3)   | 121.6     | C(20)-C(19)-H(19) | 117.7     |

|                   |           |                     |           |
|-------------------|-----------|---------------------|-----------|
| C(19)-C(20)-C(21) | 114.6(11) | N(3)-C(36)-C(35)    | 102.4(9)  |
| C(19)-C(20)-H(20) | 122.7     | N(3)-C(36)-C(37)    | 96.7(8)   |
| C(21)-C(20)-H(20) | 122.7     | C(35)-C(36)-C(37)   | 102.8(9)  |
| C(16)-C(21)-C(20) | 119.5(11) | N(3)-C(36)-H(36)    | 117.3     |
| C(16)-C(21)-C(22) | 109.2(11) | C(35)-C(36)-H(36)   | 117.3     |
| C(20)-C(21)-C(22) | 130.7(10) | C(37)-C(36)-H(36)   | 117.3     |
| N(2)-C(22)-C(23)  | 101.3(8)  | C(42)-C(37)-C(38)   | 121.9(11) |
| N(2)-C(22)-C(21)  | 98.3(8)   | C(42)-C(37)-C(36)   | 106.7(10) |
| C(23)-C(22)-C(21) | 102.5(9)  | C(38)-C(37)-C(36)   | 131.1(11) |
| N(2)-C(22)-H(22)  | 117.2     | C(39)-C(38)-C(37)   | 117.9(12) |
| C(23)-C(22)-H(22) | 117.2     | C(39)-C(38)-H(38)   | 121.1     |
| C(21)-C(22)-H(22) | 117.2     | C(37)-C(38)-H(38)   | 121.1     |
| C(24)-C(23)-C(28) | 123.4(11) | C(40)-C(39)-C(38)   | 119.2(13) |
| C(24)-C(23)-C(22) | 132.0(10) | C(40)-C(39)-H(39)   | 120.4     |
| C(28)-C(23)-C(22) | 103.8(9)  | C(38)-C(39)-H(39)   | 120.4     |
| C(23)-C(24)-C(25) | 115.6(11) | C(39)-C(40)-C(41)   | 124.5(12) |
| C(23)-C(24)-H(24) | 122.2     | C(39)-C(40)-H(40)   | 117.7     |
| C(25)-C(24)-H(24) | 122.2     | C(41)-C(40)-H(40)   | 117.7     |
| C(26)-C(25)-C(24) | 123.2(13) | C(42)-C(41)-C(40)   | 114.3(11) |
| C(26)-C(25)-H(25) | 118.4     | C(42)-C(41)-H(41)   | 122.8     |
| C(24)-C(25)-H(25) | 118.4     | C(40)-C(41)-H(41)   | 122.8     |
| C(25)-C(26)-C(27) | 121.5(13) | C(37)-C(42)-C(41)   | 122.1(11) |
| C(25)-C(26)-H(26) | 119.2     | C(37)-C(42)-C(29)   | 105.9(9)  |
| C(27)-C(26)-H(26) | 119.2     | C(41)-C(42)-C(29)   | 131.7(10) |
| C(28)-C(27)-C(26) | 116.8(11) | O-C(43)-C(44)       | 100.7(10) |
| C(28)-C(27)-H(27) | 121.6     | O-C(43)-H(43A)      | 111.6     |
| C(26)-C(27)-H(27) | 121.6     | C(44)-C(43)-H(43A)  | 111.6     |
| C(27)-C(28)-C(23) | 119.4(10) | O-C(43)-H(43B)      | 111.6     |
| C(27)-C(28)-C(15) | 133.5(10) | C(44)-C(43)-H(43B)  | 111.6     |
| C(23)-C(28)-C(15) | 107.1(9)  | H(43A)-C(43)-H(43B) | 109.4     |
| N(3)-C(29)-C(30)  | 99.9(8)   | C(45)-C(44)-C(43)   | 105.0(11) |
| N(3)-C(29)-C(42)  | 99.2(8)   | C(45)-C(44)-H(44A)  | 110.8     |
| C(30)-C(29)-C(42) | 104.0(9)  | C(43)-C(44)-H(44A)  | 110.8     |
| N(3)-C(29)-H(29)  | 117.0     | C(45)-C(44)-H(44B)  | 110.8     |
| C(30)-C(29)-H(29) | 117.0     | C(43)-C(44)-H(44B)  | 110.8     |
| C(42)-C(29)-H(29) | 117.0     | H(44A)-C(44)-H(44B) | 108.8     |
| C(35)-C(30)-C(31) | 120.1(11) | C(44)-C(45)-C(46)   | 105.5(12) |
| C(35)-C(30)-C(29) | 109.4(11) | C(44)-C(45)-H(45A)  | 110.6     |
| C(31)-C(30)-C(29) | 130.5(10) | C(46)-C(45)-H(45A)  | 110.6     |
| C(32)-C(31)-C(30) | 116.1(11) | C(44)-C(45)-H(45B)  | 110.6     |
| C(32)-C(31)-H(31) | 122.0     | C(46)-C(45)-H(45B)  | 110.6     |
| C(30)-C(31)-H(31) | 122.0     | H(45A)-C(45)-H(45B) | 108.8     |
| C(31)-C(32)-C(33) | 123.4(13) | O-C(46)-C(45)       | 101.4(9)  |
| C(31)-C(32)-H(32) | 118.3     | O-C(46)-H(46A)      | 111.5     |
| C(33)-C(32)-H(32) | 118.3     | C(45)-C(46)-H(46A)  | 111.5     |
| C(32)-C(33)-C(34) | 119.8(12) | O-C(46)-H(46B)      | 111.5     |
| C(32)-C(33)-H(33) | 120.1     | C(45)-C(46)-H(46B)  | 111.5     |
| C(34)-C(33)-H(33) | 120.1     | H(46A)-C(46)-H(46B) | 109.3     |
| C(35)-C(34)-C(33) | 117.1(11) | C(48)-C(47)-C(52)   | 129(2)    |
| C(35)-C(34)-H(34) | 121.5     | C(48)-C(47)-H(47)   | 115.3     |
| C(33)-C(34)-H(34) | 121.5     | C(52)-C(47)-H(47)   | 115.3     |
| C(34)-C(35)-C(30) | 123.4(12) | C(47)-C(48)-C(49)   | 102(2)    |
| C(34)-C(35)-C(36) | 133.9(11) | C(47)-C(48)-H(48)   | 129.2     |
| C(30)-C(35)-C(36) | 102.7(10) | C(49)-C(48)-H(48)   | 129.2     |

|                   |        |                   |           |
|-------------------|--------|-------------------|-----------|
| C(48)-C(49)-C(50) | 131(2) | C(52)-C(51)-C(50) | 109.1(17) |
| C(48)-C(49)-H(49) | 114.7  | C(52)-C(51)-H(51) | 125.5     |
| C(50)-C(49)-H(49) | 114.7  | C(50)-C(51)-H(51) | 125.5     |
| C(51)-C(50)-C(49) | 116(2) | C(51)-C(52)-C(47) | 131.9(18) |
| C(51)-C(50)-H(50) | 121.8  | C(51)-C(52)-H(52) | 114.0     |
| C(49)-C(50)-H(50) | 121.8  | C(47)-C(52)-H(52) | 114.0     |

---

Symmetry transformations used to generate equivalent atoms:

#1  $-x+2, -y, -z+1$

**Table 44.** Anisotropic displacement parameters ( $\text{\AA}^2 \times 10^4$ ) for  $\{(\text{Hdbabh})\text{MnI}(\mu\text{-N-dbabh})\}_2$ . The anisotropic displacement factor exponent takes the form:  $-2\pi^2 [ h^2 a^*^2 U^{11} + \dots + 2 h k a^* b^* U^{12} ]$

|    | $U^{11}$ | $U^{22}$ | $U^{33}$ | $U^{23}$ | $U^{13}$ | $U^{12}$ |
|----|----------|----------|----------|----------|----------|----------|
| Mn | 98(12)   | 103(12)  | 165(12)  | -47(11)  | -22(9)   | 36(10)   |
| I  | 111(4)   | 136(5)   | 235(5)   | -64(5)   | -27(4)   | 21(4)    |
